# Supplementary material
Source: publisher figshare collection journal article supplement (https://acs.figshare.com/ndownloader/files/3594690)
Supplement: Supplementary file 1 [file 3594690]

## **Supporting Information**

### **Comparing embodied greenhouse gas emissions of modern computing and electronics products**

**Paul Teehan, Milind Kandlikar**

**This document contains 95 pages, one figure, and 42 tables.**

## Table of Contents

|                                                      |     |
|------------------------------------------------------|-----|
| Table of Contents .....                              | S2  |
| List of Tables .....                                 | S3  |
| List of Figures .....                                | S4  |
| S1. Summary data tables .....                        | S5  |
| S2. Adjustments and comparison to ecoinvent .....    | S12 |
| A. System boundary .....                             | S12 |
| B. Silicon die and integrated circuits .....         | S13 |
| C. LCD assembly .....                                | S13 |
| D. LCD power supply .....                            | S14 |
| E. Other variation .....                             | S14 |
| S3. Uncertainty factors .....                        | S15 |
| S4. Silicon die content in integrated circuits ..... | S16 |
| A. Discrepancy in ecoinvent models .....             | S16 |
| B. Stacked IC's .....                                | S17 |
| S5. Linear regression model selection .....          | S19 |
| S6. Bills of materials for products analyzed .....   | S20 |
| A. Full-size desktop .....                           | S21 |
| B. Small desktop .....                               | S30 |
| C. Thin client .....                                 | S36 |
| D. LCD Monitor .....                                 | S40 |
| E. Laptop .....                                      | S43 |
| F. Netbook .....                                     | S49 |
| G. Apple iPad .....                                  | S55 |
| H. Apple iPod Touch .....                            | S59 |
| I. Amazon Kindle .....                               | S63 |
| J. Dell rack server .....                            | S66 |
| K. 3Com network switch .....                         | S74 |
| L. Desktop: ecoinvent adjusted dataset .....         | S77 |
| M. Laptop: ecoinvent adjusted dataset .....          | S78 |
| N. LCD monitor: ecoinvent adjusted dataset .....     | S79 |
| S7. Mapping to ecoinvent processes .....             | S80 |
| A. Metals .....                                      | S80 |
| B. Plastics and paper .....                          | S82 |
| C. Circuit boards and integrated circuits .....      | S84 |
| D. Small electronic components .....                 | S88 |
| E. Other electronic and electrical components .....  | S90 |
| F. Non-material processes .....                      | S93 |
| S8. References .....                                 | S95 |

## List of Tables

|                                                                                                                                |     |
|--------------------------------------------------------------------------------------------------------------------------------|-----|
| Table S1-I: Summary data table, product composition by mass .....                                                              | S5  |
| Table S1-II: Summary data table, embodied GHG emissions, in kg CO <sub>2</sub> -eq.....                                        | S6  |
| Table S1-III: Summary data table, product cumulative energy demand, in MJ.....                                                 | S7  |
| Table S1-IV: Summary data table, mass and embodied impacts, this study .....                                                   | S8  |
| Table S1-V: Summary data table, mass and embodied impacts, Apple dataset (1) .....                                             | S9  |
| Table S1-VI: Monte Carlo analysis results .....                                                                                | S10 |
| Table S1-VII: Linear regression model outputs, this study's dataset .....                                                      | S10 |
| Table S1-VIII: Linear regression model outputs, Apple dataset.....                                                             | S11 |
| Table S2-I: Global warming potential results for original ecoinvent study and our adjustments, in kg CO <sub>2</sub> -eq ..... | S12 |
| Table S3-I: Pedigree matrix scoring for uncertainty characterization .....                                                     | S15 |
| Table S5-I: Model selection results for the top fifteen models. ....                                                           | S19 |
| Table S6-I: Summary of bill of materials, large desktop .....                                                                  | S21 |
| Table S6-II: Full bill of materials, large desktop .....                                                                       | S29 |
| Table S6-III: Summary of bill of materials, small desktop .....                                                                | S30 |
| Table S6-IV: Full bill of materials, small desktop .....                                                                       | S35 |
| Table S6-V: Summary of bill of materials, thin client.....                                                                     | S36 |
| Table S6-VI: Full bill of materials, thin client.....                                                                          | S39 |
| Table S6-VII: Summary of bill of materials, LCD monitor .....                                                                  | S40 |
| Table S6-VIII: Full bill of materials, LCD monitor .....                                                                       | S42 |
| Table S6-IX: Summary of bill of materials, laptop.....                                                                         | S43 |
| Table S6-X: Full bill of materials, laptop.....                                                                                | S48 |
| Table S6-XI: Summary of bill of materials, netbook.....                                                                        | S49 |
| Table S6-XII: Full bill of materials, netbook .....                                                                            | S54 |
| Table S6-XIII: Summary of bill of materials, iPad .....                                                                        | S55 |
| Table S6-XIV: Full bill of materials, iPad.....                                                                                | S58 |
| Table S6-XV: Summary of bill of materials, iPod touch .....                                                                    | S59 |
| Table S6-XVI: Full bill of materials, iPod touch .....                                                                         | S62 |
| Table S6-XVII: Summary of bill of materials, Amazon Kindle.....                                                                | S63 |
| Table S6-XVIII: Full bill of materials, Amazon Kindle.....                                                                     | S65 |
| Table S6-XIX: Summary of bill of materials, rack server .....                                                                  | S66 |
| Table S6-XX: Full bill of materials, rack server .....                                                                         | S73 |
| Table S6-XXI: Summary of bill of materials, network switch .....                                                               | S74 |
| Table S6-XXII: Full bill of materials, network switch .....                                                                    | S76 |
| Table S6-XXIII: Summary of bill of materials, desktop (adjusted ecoinvent dataset).....                                        | S77 |
| Table S6-XXIV: Summary of bill of materials, laptop (adjusted ecoinvent dataset) .....                                         | S78 |
| Table S6-XXV: Summary of bill of materials, LCD monitor (adjusted ecoinvent dataset) .....                                     | S79 |
| Table S7-I: Process ecoinvent mapping, metals.....                                                                             | S82 |
| Table S7-II: Process ecoinvent mapping, plastics and paper .....                                                               | S84 |
| Table S7-III: Process ecoinvent mapping, circuit boards and integrated circuits .....                                          | S87 |

|                                                                                        |     |
|----------------------------------------------------------------------------------------|-----|
| Table S7-IV: Process ecoinvent mapping, small electronic components.....               | S89 |
| Table S7-V: Process ecoinvent mapping, other electronic and electrical components..... | S92 |
| Table S7-VI: Process ecoinvent mapping, non-material processes .....                   | S94 |

## List of Figures

|                                                            |     |
|------------------------------------------------------------|-----|
| Figure S4-1: Silicon die area measurements via x-ray ..... | S16 |
|------------------------------------------------------------|-----|

## S1. Summary data tables

This section contains data tables summarizing all results for each graph in the text.

|                                    |                         | Desktop (ei) | Desktop - tower | Desktop - small | Thin client | LCD monitor, 17" (ei) | LCD monitor, 21.5" | Laptop, with dock, 12" (ei) | Laptop, 16" | Netbook, 10" | iPad | iPod touch | Kindle | Rack server | Switch |
|------------------------------------|-------------------------|--------------|-----------------|-----------------|-------------|-----------------------|--------------------|-----------------------------|-------------|--------------|------|------------|--------|-------------|--------|
| <b>Power supply</b>                | Mass (g)                | 1463         | 1461            | 476             | 182         | 114                   | 173                | 537                         | 433         | 297          | 89   | 89         | 89     | 2911        | 193    |
| <b>Casing</b>                      | Mass (g)                | 6207         | 6171            | 1258            | 860         | 862                   | 2157               | 1413                        | 904         | 265          | 151  | 49         | 59     | 8767        | 1404   |
| <b>Circuit boards (excl. IC's)</b> | Mass (g)                | 1558         | 1028            | 407             | 227         | 94                    | 38                 | 345                         | 281         | 127          | 30   | 6          | 33     | 2199        | 460    |
| <b>IC's (packages)</b>             | Mass (g)                | 119          | 40              | 35              | 8           | 19                    | 2                  | 86                          | 21          | 17           | 2    | 1          | 2      | 88          | 47     |
| <b>IC's (die)</b>                  | Area (mm <sup>2</sup> ) | 2195         | 500             | 218             | 126         | 355                   | 22                 | 1577                        | 483         | 463          | 170  | 52         | 66     | 1683        | 366    |
| <b>IC's (die)</b>                  | Mass (mg)               | 3970         | 905             | 394             | 228         | 642                   | 39                 | 2851                        | 873         | 837          | 307  | 94         | 120    | 3043        | 663    |
| <b>Battery</b>                     | Mass (g)                | 0            | 0               | 0               | 0           | 0                     | 0                  | 273                         | 244         | 178          | 129  | 16         | 51     | 0           | 0      |
| <b>Display</b>                     | Mass (g)                | 0            | 0               | 0               | 0           | 4006                  | 2350               | 328                         | 553         | 204          | 342  | 35         | 34     | 0           | 0      |
| <b>Other</b>                       | Mass (g)                | 1796         | 1959            | 796             | 0           | 0                     | 350                | 367                         | 334         | 250          | 34   | 3          | 45     | 1506        | 16     |
| <b>Total</b>                       | Mass(g)                 | 11144        | 10660           | 2972            | 1277        | 5096                  | 5070               | 3349                        | 2770        | 1337         | 777  | 198        | 312    | 15471       | 2119   |

Table S1-I: Summary data table, product composition by mass

|                                    | Desktop (ei) | Desktop - tower | Desktop - small | Thin client | LCD monitor, 17" (ei) | LCD monitor, 21.5" | Laptop, with dock, 12" (ei) | Laptop, 16" | Netbook, 10" | iPad | iPod touch | Kindle | Rack server | Switch |
|------------------------------------|--------------|-----------------|-----------------|-------------|-----------------------|--------------------|-----------------------------|-------------|--------------|------|------------|--------|-------------|--------|
| <b>Power supply</b>                | 38.2         | 40.5            | 17.2            | 5.1         | 10.9                  | 10.1               | 2.9                         | 9.0         | 7.8          | 2.3  | 2.3        | 2.3    | 89.3        | 10.8   |
| <b>Casing</b>                      | 13.1         | 15.3            | 2.9             | 3.7         | 6.8                   | 10.2               | 64.4                        | 6.8         | 2.0          | 1.3  | 0.4        | 0.5    | 18.5        | 3.8    |
| <b>Circuit boards (excl. IC's)</b> | 76.9         | 38.6            | 23.7            | 12.6        | 9.6                   | 2.2                | 32.0                        | 16.2        | 8.6          | 1.7  | 0.4        | 2.4    | 128.8       | 25.3   |
| <b>IC's (packages)</b>             | 80.4         | 15.0            | 11.2            | 5.6         | 14.2                  | 1.2                | 58.9                        | 15.5        | 12.1         | 1.3  | 0.6        | 1.2    | 50.8        | 34.3   |
| <b>IC's (die)</b>                  | 79.0         | 21.5            | 9.4             | 5.4         | 17.0                  | 1.0                | 67.8                        | 20.8        | 19.9         | 7.3  | 2.2        | 3.6    | 72.4        | 15.8   |
| <b>Battery</b>                     | 0.0          | 0.0             | 0.0             | 0.0         | 0.0                   | 0.0                | 1.4                         | 1.3         | 0.9          | 0.7  | 0.1        | 0.3    | 0.0         | 0.0    |
| <b>Display</b>                     | 0.0          | 0.0             | 0.0             | 0.0         | 236.3                 | 138.6              | 19.3                        | 31.9        | 6.7          | 9.9  | 0.8        | 2.0    | 0.0         | 0.0    |
| <b>Other</b>                       | 29.9         | 28.9            | 7.2             | 0.0         | 0.0                   | 1.9                | 7.4                         | 4.9         | 2.9          | 0.1  | 0.0        | 0.3    | 18.2        | 0.2    |
| <b>Transport</b>                   | 2.8          | 2.7             | 0.8             | 0.3         | 1.3                   | 1.3                | 0.8                         | 0.7         | 0.3          | 0.2  | 0.0        | 0.1    | 3.9         | 0.5    |
| <b>Assembly</b>                    | 1.2          | 1.2             | 1.2             | 0.9         | 1.2                   | 1.2                | 1.2                         | 0.9         | 0.9          | 0.6  | 0.6        | 0.6    | 1.2         | 1.2    |
| <b>Total</b>                       | 321.6        | 163.7           | 73.5            | 33.6        | 297.3                 | 167.8              | 256.2                       | 107.8       | 62.2         | 25.5 | 7.5        | 13.3   | 383.1       | 91.8   |

Table S1-II: Summary data table, embodied GHG emissions, in kg CO<sub>2</sub>-eq

|                                    | Desktop (ei) | Desktop - tower | Desktop - small | Thin client | LCD monitor, 17" (ei) | LCD monitor, 21.5" | Laptop, with dock, 12" (ei) | Laptop, 16" | Netbook, 10" | iPad  | iPod touch | Kindle | Rack server | Switch |
|------------------------------------|--------------|-----------------|-----------------|-------------|-----------------------|--------------------|-----------------------------|-------------|--------------|-------|------------|--------|-------------|--------|
| <b>Power supply</b>                | 722.9        | 753.7           | 314.1           | 96.4        | 200.5                 | 189.9              | 53.5                        | 172.9       | 151.3        | 42.2  | 42.2       | 42.2   | 1653.4      | 202.7  |
| <b>Casing</b>                      | 214.7        | 272.9           | 48.5            | 70.1        | 120.8                 | 203.2              | 330.2                       | 134.2       | 39.1         | 21.8  | 7.2        | 7.9    | 302.4       | 57.6   |
| <b>Circuit boards (excl. IC's)</b> | 1620.9       | 757.0           | 439.0           | 233.1       | 180.4                 | 41.0               | 605.6                       | 322.7       | 160.9        | 32.0  | 7.0        | 44.8   | 2407.3      | 479.9  |
| <b>IC's (packages)</b>             | 1778.1       | 301.1           | 229.0           | 126.0       | 268.5                 | 23.7               | 1259.0                      | 306.2       | 245.4        | 25.1  | 11.1       | 22.3   | 1008.2      | 650.1  |
| <b>IC's (die)</b>                  | 1222.8       | 318.3           | 138.4           | 80.3        | 255.5                 | 15.7               | 1002.8                      | 307.2       | 294.2        | 108.1 | 33.0       | 53.0   | 961.0       | 233.1  |
| <b>Battery</b>                     | 0.0          | 0.0             | 0.0             | 0.0         | 0.0                   | 0.0                | 27.5                        | 24.6        | 17.9         | 13.0  | 1.6        | 5.1    | 0.0         | 0.0    |
| <b>Display</b>                     | 0.0          | 0.0             | 0.0             | 0.0         | 3518.1                | 2063.8             | 288.0                       | 475.4       | 100.7        | 148.4 | 11.4       | 29.8   | 0.0         | 0.0    |
| <b>Other</b>                       | 536.0        | 516.0           | 131.9           | 0.0         | 0.0                   | 41.3               | 133.0                       | 87.8        | 53.8         | 3.3   | 0.3        | 6.0    | 341.9       | 3.6    |
| <b>Transport</b>                   | 44.5         | 42.5            | 12.1            | 5.1         | 20.3                  | 20.2               | 13.4                        | 11.1        | 5.3          | 3.1   | 0.8        | 1.2    | 61.7        | 8.5    |
| <b>Assembly</b>                    | 25.3         | 25.3            | 25.3            | 19.0        | 25.3                  | 25.3               | 25.3                        | 19.0        | 19.0         | 12.7  | 12.7       | 12.7   | 25.3        | 25.3   |
| <b>Total</b>                       | 6165.2       | 2986.8          | 1338.3          | 630.1       | 4589.5                | 2624.1             | 3738.2                      | 1861.1      | 1087.8       | 409.6 | 127.1      | 225.1  | 6761.1      | 1660.8 |

Table S1-III: Summary data table, product cumulative energy demand, in MJ

| Product (this study)        | Mass (g) | GHG (kg CO <sub>2</sub> -eq) | MJ primary energy |
|-----------------------------|----------|------------------------------|-------------------|
| Desktop (ei)                | 11144    | 321.6                        | 6165.2            |
| Desktop - tower             | 10660    | 163.7                        | 2986.8            |
| Desktop - small             | 2972     | 73.5                         | 1338.3            |
| Thin client                 | 1277     | 33.6                         | 630.1             |
| LCD monitor, 17" (ei)       | 5096     | 297.3                        | 4589.5            |
| LCD monitor, 21.5"          | 5070     | 167.8                        | 2624.1            |
| Laptop, with dock, 12" (ei) | 3350     | 256.2                        | 3738.2            |
| Laptop, 16"                 | 2770     | 107.8                        | 1861.1            |
| Netbook, 10"                | 1337     | 62.2                         | 1087.8            |
| iPad                        | 777      | 25.5                         | 409.6             |
| iPod touch                  | 198      | 7.5                          | 127.1             |
| Kindle                      | 312      | 13.3                         | 225.1             |
| Rack server                 | 15471    | 383.1                        | 6761.1            |
| Switch                      | 2119     | 91.8                         | 1660.8            |

Table S1-IV: Summary data table, mass and embodied impacts, this study



| Apple Product                     | Mass (g) | GHG (kg CO <sub>2</sub> -eq) |
|-----------------------------------|----------|------------------------------|
| <b>27-inch LED Cinema Display</b> | 10900    | 516.6                        |
| <b>Thunderbolt Display</b>        | 10922    | 301.6                        |
| <b>Apple TV</b>                   | 270      | 25.2                         |
| <b>21.5-inch iMac</b>             | 9304     | 349.2                        |
| <b>27-inch iMac</b>               | 13800    | 455.7                        |
| <b>iPad 2</b>                     | 590      | 63                           |
| <b>iPhone 3GS</b>                 | 135      | 24.75                        |
| <b>iPhone 4</b>                   | 135      | 25.65                        |
| <b>iPod classic</b>               | 139      | 11.5                         |
| <b>iPod nano</b>                  | 21.1     | 7.02                         |
| <b>iPod shuffle</b>               | 12.5     | 2.88                         |
| <b>iPod touch</b>                 | 101      | 15.37                        |
| <b>11-inch MacBook Air</b>        | 1080     | 162                          |
| <b>13-inch MacBook Air</b>        | 1350     | 198.4                        |
| <b>MacBook</b>                    | 2132     | 142.6                        |
| <b>13-inch MacBook Pro</b>        | 2041     | 203                          |
| <b>15-inch MacBook Pro</b>        | 2539     | 289.8                        |
| <b>17-inch MacBook Pro</b>        | 2994     | 334.8                        |
| <b>Mac mini with Lion Server</b>  | 1400     | 146.9                        |
| <b>Mac mini</b>                   | 1300     | 153.9                        |
| <b>Mac pro</b>                    | 18100    | 789.6                        |
| <b>Xserve</b>                     | 13540    | 416                          |

Table S1-V: Summary data table, mass and embodied impacts, Apple dataset (1)

| Product                     | Mean<br>(kg CO <sub>2</sub> -eq) | Standard deviation<br>(kg CO <sub>2</sub> -eq) | Standard deviation<br>(% of mean) |
|-----------------------------|----------------------------------|------------------------------------------------|-----------------------------------|
| Rack server                 | 378.6                            | 40.9                                           | 0.11                              |
| Desktop (ei)                | 307.9                            | 31.6                                           | 0.10                              |
| LCD monitor, 17" (ei)       | 295.0                            | 45.4                                           | 0.15                              |
| Laptop, with dock, 12" (ei) | 249.3                            | 44.8                                           | 0.18                              |
| LCD monitor, 21.5"          | 167.4                            | 31.8                                           | 0.19                              |
| Desktop – tower             | 158.0                            | 15.2                                           | 0.10                              |
| Laptop, 16"                 | 107.2                            | 10.6                                           | 0.10                              |
| Switch                      | 91.4                             | 8.8                                            | 0.10                              |
| Desktop – small             | 72.7                             | 7.6                                            | 0.10                              |
| Netbook, 10"                | 60.6                             | 7.0                                            | 0.12                              |
| Thin client                 | 34.9                             | 3.4                                            | 0.10                              |
| iPad                        | 25.7                             | 3.9                                            | 0.15                              |
| Kindle                      | 13.2                             | 1.7                                            | 0.13                              |
| iPod touch                  | 7.5                              | 0.9                                            | 0.12                              |

Table S1-VI: Monte Carlo analysis results

|                               | Mass(g) | GHG (kg CO <sub>2</sub> -eq) | Model estimates (kg CO <sub>2</sub> -eq) |           |              |
|-------------------------------|---------|------------------------------|------------------------------------------|-----------|--------------|
|                               |         |                              | pcb+disp+batt                            | Mass only | All internal |
| Desktop (ei)                  | 11144   | 321.6                        | 285.4                                    | 302.5     | 310.3        |
| Desktop - tower               | 10660   | 163.7                        | 188.3                                    | 289.3     | 181.0        |
| Desktop - small               | 2972    | 73.5                         | 74.5                                     | 80.7      | 64.9         |
| Thin client                   | 1277    | 33.6                         | 41.5                                     | 34.7      | 50.3         |
| LCD monitor 17-inch (ei)      | 5095    | 297.3                        | 296.2                                    | 138.3     | 294.7        |
| LCD monitor 21.5-inch         | 5070    | 167.8                        | 160.5                                    | 137.6     | 162.9        |
| Laptop with dock 12-inch (ei) | 3349    | 256.2                        | 167.6                                    | 90.9      | 171.4        |
| Laptop 16-inch                | 2770    | 107.8                        | 161.8                                    | 75.2      | 162.2        |
| Netbook 10-inch               | 1337    | 62.2                         | 90.7                                     | 36.3      | 83.9         |
| iPad                          | 777     | 25.5                         | 67.1                                     | 21.1      | 69.3         |
| iPod touch                    | 198     | 7.5                          | 8.2                                      | 5.4       | 2.8          |
| Kindle                        | 312     | 13.3                         | 23.8                                     | 8.5       | 21.5         |
| Rack server                   | 15471   | 383.1                        | 402.7                                    | 419.9     | 383.5        |
| Switch                        | 2119    | 91.8                         | 84.2                                     | 57.5      | 111.7        |

Table S1-VII: Linear regression model outputs, this study's dataset

|                                   | Mass(g) | GHG (kg CO <sub>2</sub> -eq) | Model estimates (kg CO <sub>2</sub> -eq) |           |              |
|-----------------------------------|---------|------------------------------|------------------------------------------|-----------|--------------|
|                                   |         |                              | pcb+disp+batt                            | Mass only | All internal |
| <b>27-inch LED Cinema Display</b> | 10900   | 517                          | 351.3                                    | 430.4     | 375.9        |
| <b>Thunderbolt Display</b>        | 10922   | 302                          | 359.4                                    | 431.2     | 386.5        |
| <b>Apple TV</b>                   | 270     | 25                           | 16.2                                     | 10.7      | 0.3          |
| <b>21.5-inch iMac</b>             | 9304    | 349                          | 363.7                                    | 367.4     | 317.0        |
| <b>27-inch iMac</b>               | 13800   | 456                          | 551.8                                    | 544.9     | 525.8        |
| <b>iPad 2</b>                     | 590     | 63                           | 74.2                                     | 23.3      | 68.9         |
| <b>iPhone 3GS</b>                 | 135     | 25                           | 18.1                                     | 5.3       | 17.2         |
| <b>iPhone 4</b>                   | 135     | 26                           | 17.2                                     | 5.3       | 16.8         |
| <b>iPod classic</b>               | 139     | 12                           | 8.1                                      | 5.5       | 8.7          |
| <b>iPod nano</b>                  | 21      | 7                            | 1.9                                      | 0.8       | 1.1          |
| <b>iPod shuffle</b>               | 13      | 3                            | 0.9                                      | 0.5       | 0.0          |
| <b>iPod touch</b>                 | 101     | 15                           | 10.6                                     | 4.0       | 7.1          |
| <b>11-inch MacBook Air</b>        | 1080    | 162                          | 128.3                                    | 42.6      | 112.0        |
| <b>13-inch MacBook Air</b>        | 1350    | 198                          | 163.8                                    | 53.3      | 140.6        |
| <b>MacBook</b>                    | 2132    | 143                          | 204.8                                    | 84.2      | 193.7        |
| <b>13-inch MacBook Pro</b>        | 2041    | 203                          | 222.1                                    | 80.6      | 237.6        |
| <b>15-inch MacBook Pro</b>        | 2539    | 290                          | 264.3                                    | 100.2     | 272.1        |
| <b>17-inch MacBook Pro</b>        | 2994    | 335                          | 334.0                                    | 118.2     | 344.7        |
| <b>Mac mini with Lion Server</b>  | 1400    | 147                          | 132.5                                    | 55.3      | 112.1        |
| <b>Mac mini</b>                   | 1300    | 154                          | 132.5                                    | 51.3      | 102.0        |
| <b>Mac pro</b>                    | 18100   | 790                          | 588.7                                    | 714.7     | 782.5        |
| <b>Xserve</b>                     | 13540   | 416                          | 588.7                                    | 534.6     | 428.1        |

Table S1-VIII: Linear regression model outputs, Apple dataset

## S2. Adjustments and comparison to ecoinvent

This study used the data and assumptions from the ecoinvent database, with a few adjustments and modifications. Three products from the ecoinvent database (2), a desktop ('desktop computer, without screen, at plant'), laptop ('laptop computer, at plant'), and LCD monitor ('LCD flat screen, 17 inches, at plant'), were re-implemented in our modeling framework. Our results can be compared against the original results from the ecoinvent database both to illustrate the impact of the adjustments we have made, and to confirm that our framework reproduces the ecoinvent modeling assumptions. A summary of the original results and our adjusted results is in Table S2-I below, followed by a summary of the major adjustments we have made.

Parts were categorized as follows: *circuit boards* includes mainboards, RAM, video cards, and any other circuit boards, as well as all integrated circuits, connectors, capacitors, processor heat sinks, and other board-mounted components; *casing* includes all metal and plastic frames and screws from the device exterior; *display* is the screen unit only; *power supply* includes power cables as well as internal power supplies and smaller external supplies including chargers; *battery* includes only large cells, such as lithium-ion laptop batteries; and *other* includes any remaining components such as interior power cables, internal frames, disk and optical drives, case fans, and any remaining parts.

|                       | Desktop | Adjusted | Laptop | Adjusted | LCD monitor | Adjusted |
|-----------------------|---------|----------|--------|----------|-------------|----------|
| <b>Assembly</b>       | 1.4     | 1.2      | 0.9    | 1.2      | 52.7        | 1.2      |
| <b>Battery</b>        |         |          | 1.6    | 1.4      |             |          |
| <b>Casing</b>         | 15.6    | 13.1     | 61.0   | 64.4     | 6.9         | 6.8      |
| <b>Circuit boards</b> | 180.1   | 236.4    | 104.0  | 158.7    | 34.3        | 40.8     |
| <b>Display</b>        |         |          | 19.3   | 19.3     | 236.3       | 236.3    |
| <b>EOL</b>            | 5.5     |          | 3.9    |          |             |          |
| <b>Other</b>          | 32.7    | 29.9     | 9.1    | 7.4      |             |          |
| <b>Packaging</b>      | 2.8     |          | 2.9    |          | 3.1         |          |
| <b>Power supply</b>   | 28.4    | 38.2     | 3.8    | 2.9      |             | 10.9     |
| <b>Transport</b>      | 2.7     | 2.8      | 0.8    | 0.7      |             | 1.3      |
| <b>Total</b>          | 269.3   | 321.6    | 207.4  | 256.0    | 333.3       | 297.3    |

Table S2-I: Global warming potential results for original ecoinvent study and our adjustments, in kg CO<sub>2</sub>-eq

### A. System boundary

Our study excludes the use and end-of-life phases, because we are focusing on impacts during device production. We exclude device packaging because we did not have any information about packaging for some of the products in our study; ideally we would include packaging for all products, but the magnitude of impacts due to packaging are typically small, so its exclusion will not significantly affect the results. Final assembly and transport are included using the standard ecoinvent assumptions. Note that

the LCD screen in ecoinvent did not include transport, and included an extra assembly step which we believe is spurious (see discussion below); we have adjusted this study so it is consistent with the others.

## **B. Silicon die and integrated circuits**

We calculate the silicon die content using an empirically derived relationship, discussed in Section S4. The silicon die content per packaged chip is estimated to be about  $18\text{mm}^2$  die per gram of packaged chip, which is significantly larger than the ecoinvent processes, which estimates  $5.5\text{mm}^2$  per gram for logic chips (integrated circuit, IC, logic type, at plant) and  $10.1\text{mm}^2$  die per gram for memory chips (integrated circuit, IC, memory type, at plant). The lower estimates in ecoinvent are due to apparently erroneous assumptions in the ecoinvent database, discussed in previous work (3, 4) and in Section S4. We have adjusted the desktop, laptop, and LCD monitor processes to use our estimates, which has significantly increased the impacts due to integrated circuits. In addition, we have applied updated life cycle assessment results for silicon die (5), though this has a relatively small influence on the results.

## **C. LCD assembly**

The ecoinvent process ‘LCD flat screen, 17 inches, at plant’ includes an assembly process called ‘assembly, LCD screen’ which includes significant chemical usage. However, the top-level process for the LCD monitor also includes an LCD module (‘LCD module, at plant’) which itself contains a very similar assembly process (‘assembly, LCD module’). The two processes, ‘assembly, LCD screen’ and ‘assembly, LCD module’, are in fact nearly identical in their contents, except the inventory contents in the latter are 3.91 times larger in all cases, and there are a small number of items present in the latter process but not in the former. The ecoinvent documentation is not fully clear on the purpose and function of the ‘assembly, LCD screen’ process.

There is no reason to suppose that additional chemical-intensive processes are required in order to assemble the completed components of an LCD monitor (casing, LCD module, cables, etc.); the finished product can be disassembled into such components using a hand screwdriver. Therefore, either the chemical-intensive ‘assembly, LCD screen’ process is spurious, or the ‘LCD module, at plant’ process is intended to represent only part of the central display apparatus. We believe the former is more likely, for two reasons. First, this would be more consistent with the conventions of ecoinvent in which top-level processes include finished components; notably, the laptop computer process includes this LCD module, but not the ‘assembly, LCD screen’ process. Second, the study upon which this data was originally drawn defines an ‘LCD module’ as including “the LCD panel (i.e., front and back glass panels, liquid crystals and polarizers, column and row drivers), the backlight unit, and the main LCD controller PWB” (6). This represents all of the major components in an LCD monitor (6) which implies that the LCD module is indeed the entire central display apparatus.

In order to maintain a consistent approach we have assumed that the ‘LCD module, at plant’ process represents a finished display component, and that products which include this component do not require an additional chemical-intensive assembly step. Therefore, we have adjusted the ‘LCD flat screen, 17 inches, at plant’ process to remove the ‘assembly, LCD screen’ component. This process accounted for 53.0 kg CO<sub>2</sub>-eq of the LCD flat screen’s global warming potential.

#### **D. LCD power supply**

There is no power supply modeled in the ecoinvent LCD monitor process. However, the main circuit board process is defined as a mixture of a surface-mount populated printed wiring board and a through-hole populated printed wiring board. The surface-mount board modeled in ecoinvent contains components which suggest it is used for logic applications, while the through-hole board contains power electronics which suggest it is used in power supplies. In order to maintain consistency with other products, we have split these two components in our adjusted study and assumed that the through-hole circuit board models the monitor's power supply.

#### **E. Other variation**

The above adjustments account for nearly all of the differences between our results and the original ecoinvent studies. The remainder is caused by our modeling framework which has condensed the ecoinvent database into a subset of about 100 important processes. In some cases there is a reduction of detail in which we have chosen to use proxy materials; for example, we model only one type of radial cylindrical inductor, whereas ecoinvent has separate processes for small and large inductors. The reduction of detail simplifies our project with minimal loss of accuracy.

### S3. Uncertainty factors

The ecoinvent database uses a semi-quantitative scale based on pedigree matrices to assign uncertainty distributions (7). In general, if a product includes  $n$  kg of a substance, then  $n$  is assumed to be the mean of a random variable  $N$  with standard deviation  $s$ , where  $s$  depends on the quality of data which produced the estimate of  $n$  kg, and the value of  $s$  is a function of expert judgments and is determined using a pedigree matrix. Because impact models are linear, the calculated impacts due to this substance will have a relative standard deviation (i.e. standard deviation divided by mean) equivalent to the amount of the substance present.

We have assigned standard deviations to all line items in our bills of materials according to our judgments of how well the ecoinvent processes, especially those modeling electronics components, map to the components in the products we have analyzed. In the interests of simplicity we have assigned a general data quality score to the entire ecoinvent dataset and applied this score to all items, with the exception of silicon die and LCD screens. The scoring according to the pedigree matrix format in the ecoinvent database is shown below in Table S3-I.

| Category                                 | Score                                                                                                                                            | Uncertainty factors $U_i$ |
|------------------------------------------|--------------------------------------------------------------------------------------------------------------------------------------------------|---------------------------|
| <b>Reliability</b>                       | 3: Non-verified data partly based on qualified estimates                                                                                         | 1.10                      |
| <b>Completeness</b>                      | 4: Representative data from only one site relevant for the market considered OR some sites but from shorter periods                              | 1.10                      |
| <b>Temporal correlation</b>              | 3: Less than 10 years of difference to our reference year (2000)                                                                                 | 1.10                      |
| <b>Geographical correlation</b>          | 2: Average data from larger area in which the area under study is included                                                                       | 1.01                      |
| <b>Further technological correlation</b> | 3: Data on related processes or materials but same technology, OR<br>Data from processes and materials under study but from different technology | 1.20                      |
| <b>Sample size</b>                       | 5: unknown                                                                                                                                       | 1.20                      |

Table S3-I: Pedigree matrix scoring for uncertainty characterization

Using the formulas supplied in the ecoinvent documentation  $\sigma_g^2 = \exp(U)$  where  $U = \sqrt{\sum_i (\ln^2 U_i)}$  with the above uncertainty factors yields a geometric standard deviation  $\sigma_g^2 = 1.36$ . This factor is applied as the default for all inventory items in our study.

For silicon die and LCD screens which have additional uncertainty, we downgrade the reliability and technological correlation scores from 3 to 4, which changes the uncertainty factors from 1.10 and 1.20 to 1.20 and 1.50, respectively, and results in a new geometric standard deviation  $\sigma_g^2 = 1.65$ .

Transport processes are assigned a score of  $\sigma_g^2 = 2.1$  in order to maintain consistency with other electronics processes in ecoinvent.

## S4. Silicon die content in integrated circuits

Figure S4-1 below shows the results of X-ray measurements of packaged IC's which were used to derive conversion ratios for estimating silicon die content. Twenty-two IC's were successfully X-rayed and their silicon die area measured. The dataset is split to illustrate that most surface-mount IC's are very small and show high diversity in package types; the linear trend is mostly driven by large ball-grid array IC's with large die. Errors are thus likely when estimating die content of small IC's, but the absolute magnitude of these errors will also be small in proportion to the size of these IC's. Diversity in packaging technique leads to non-linear variation which is more pronounced in measurements of mass; it is thus preferable to use the top-down area of the package to estimate die content.

These results were used to create ratios that allow estimation of silicon die by packaged IC area and by IC mass. The mass of a die was calculated using the volume density of silicon, 2.33g per  $\text{cm}^3$ , and the standard thickness of a 300mm wafer, 775 $\mu\text{m}$  (8). Using a simple linear fit, we derived a best-fit mass ratio of about 18 $\text{mm}^2$  of silicon die per gram of packaged chip ( $R^2=0.58$ ), and a best-fit area ratio of about 0.078 $\text{mm}^2$  of silicon die per  $\text{mm}^2$  of package area ( $R^2=0.70$ ). By comparison, the ecoinvent database assumes 5.5 $\text{mm}^2$  silicon die per gram for logic chips and 10.1 $\text{mm}^2$  silicon die per gram for memory chip.

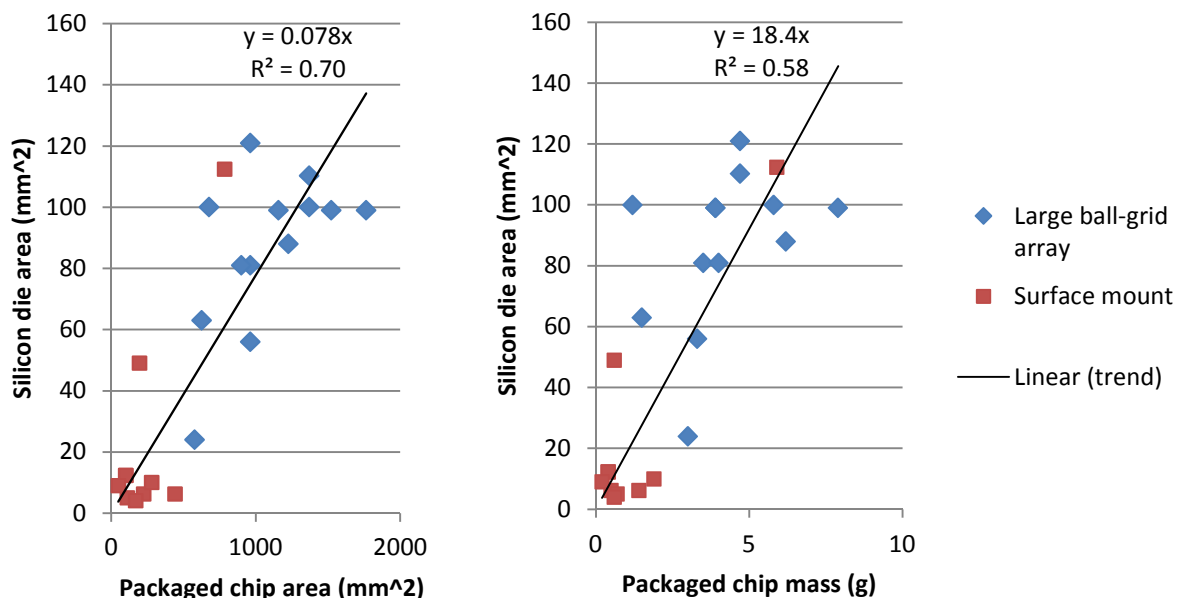

Figure S4-1: Silicon die area measurements via X-ray

### A. Discrepancy in ecoinvent models



The ecoinvent calculation uses a mass ratio to determine die size. Given an example packaged chip with dimensions of 27mm\*27mm\*2.36mm, a mass of 2.6g, and an assumption that the silicon die is 2% of the packaged chip mass, the ecoinvent calculation of silicon die area per kilogram of packaged chip is as follows, from (1):

$$\text{Die area per kg packaged chip} = (0.027 \times 0.027) \times 0.02 / 0.00262 = 0.0056 \text{ m}^2 \text{ per kg}$$

The equation has the following factors:

Left side of equation: Die area / packaged chip mass

Right side of equation: Packaged chip area \* (die mass / packaged chip mass) / (packaged chip mass)

The units of each factor are as follows:

Left side of equation: m<sup>2</sup> die/ kg chip

Right side of equation: (kg die/kg chip) / kg chip

Unfortunately, the units on the right side of the equation do not resolve to those on the left side; this is the source of the discrepancy. The difficulty could be resolved by replacing the mass ratio with a ratio expressing die area divided by packaged chip area:

Left side of equation: m<sup>2</sup> die / kg chip

Right side of equation: m<sup>2</sup> chip \* (m<sup>2</sup> die/m<sup>2</sup> chip) / kg chip

We measured an area ratio of 0.078 mm<sup>2</sup> die per mm<sup>2</sup> chip. Using the example chip with area 27 mm \* 27 mm and mass of 2.6 g would imply a die area of  $(0.027 \times 0.027) \times 0.078 / 0.00262 = 0.021 \text{ m}^2 \text{ per kg}$ , which is a factor of 3.9 higher than the ecoinvent calculated result of 0.0056 m<sup>2</sup> per kg.

Alternatively, the intended result, m<sup>2</sup> die / kg chip, can be determined empirically as we have done by examining the die area and chip masses of several packaged chips. The area ratio we measured, 18mm<sup>2</sup> per gram of packaged chip, or 0.018 m<sup>2</sup> per kg, is a factor of 3.2 higher than ecoinvent's assumption of 0.0056 m<sup>2</sup> per kg. These results indicate that the ecoinvent dataset significantly underestimates the silicon die content of packaged IC's.

## B. Stacked IC's

Some IC packages contain multiple die in order to save space and improve connectivity between modules. The practice is especially common in mobile devices which require high performance but are heavily space-constrained; a common use is to combine multiple memory die, alone or with a processor, either by stacking silicon die directly on top of one another within one package, a technique known as "stacked die", or by stacking packaged chips, a technique known as "package-on-package" (9). Our assessment technique of x-raying packages was not able to clearly detect stacked die or package-on-package configurations, so we referred to industrial literature to identify these chips and make appropriate corrections to our bills-of-materials.

Third party analysis of the iPad showed that its A4 processor contains one CPU die and two memory die (10). Cross-sectional photographs from that analysis show that the RAM dies are 85% of the size of the processor die in one dimension. Assuming the same is true in the other dimension, the RAM die area is 72% of the processor die, which means that the approximately 50mm<sup>2</sup> CPU die is accompanied by two RAM die with area about 36mm<sup>2</sup> each. The NAND solid-state storage chip did not include stacked die in the iPad model we analyzed, though higher-capacity iPad models would have (11). The 4<sup>th</sup> generation iPod touch uses the same A4 processor with memory die as the iPad (12). The 3<sup>rd</sup> generation model we analyzed has a Samsung ARM processor with the same amount of RAM (13) and thus also likely uses a stacked configuration; the package is smaller, but we assume the same ratio of stacked memory die to processor die as in the iPad. The 3<sup>rd</sup> generation Kindle uses a low-cost ARM processor which does not appear to include stacked die or chips (14). The use of stacked packaging technologies is unlikely in this product due to its low cost and lower performance requirements.

Stacked-die packages are common in flash memory used in memory cards and in cell-phone processors (9). Because of the added cost and complexity of using stacked die packaging, they are most likely to appear in small devices which are heavily area-constrained, and unlikely to appear in laptop and desktop computers and other larger equipment. We found no third-party teardowns of the other products in our study to compare against, but did search for information on each major IC (CPU and RAM) and found no evidence to suggest that any stacked-die or package-on-package technologies were in use. As such, we made no further adjustments to account for stacking technologies.

Technical and economic constraints point to future widespread usage of many types of stacking technologies, especially in mobile devices (9). These trends will make identifying the die area used in a product considerably more difficult. Mass of packaged chips would no longer be viable as a functional unit; life cycle assessments must accurately account for die area. X-raying would no longer be a viable technique for tabulating this area, unless very high-resolution cross-sectional x-rays were available; grinding packages away to reveal the die inside will probably be the only reliable technique for accurately measuring silicon die content of an integrated circuit. Ideally, manufacturer specifications could be made available and incorporated into life cycle assessments in order to make such painstaking measurements unnecessary.

## S5. Linear regression model selection

Three linear models are discussed in the text. Below are the fit results for the best fifteen models which were attempted during the model selection process. The cross-validated sum of squares (cvss) and raw and adjusted  $R^2$  are shown for each of two datasets; dataset one represents our study, and dataset two is Apple's dataset. The cvss scores are normalized to the mass-only model. The combined score is equal to the sum of the squares of the two cvss scores. Shaded rows represent the three models which are presented in the text.

| Model predictors              | cvss <sub>1</sub> | cvss <sub>2</sub> | score | $R^2_1$ | $R^2_1$ -adj | $R^2_2$ | $R^2_2$ -adj |
|-------------------------------|-------------------|-------------------|-------|---------|--------------|---------|--------------|
| Ma, int=0                     | 1.00              | 1.00              | 2.00  | 0.85    | 0.84         | 0.89    | 0.88         |
| Bo, Ps, Di, Ba, int=0         | 0.38              | 1.39              | 2.09  | 0.97    | 0.96         | 0.96    | 0.96         |
| Bo, Di, Ba, int=0             | 0.42              | 1.40              | 2.12  | 0.97    | 0.96         | 0.94    | 0.93         |
| Bo, Di, Ba                    | 0.45              | 1.40              | 2.17  | 0.92    | 0.90         | 0.87    | 0.84         |
| Ca                            | 1.32              | 1.25              | 3.30  | 0.55    | 0.51         | 0.75    | 0.74         |
| Bo, Ps, Di, Ba, Ca, Ot        | 0.62              | 1.81              | 3.66  | 0.94    | 0.88         | 0.95    | 0.93         |
| Bo, Ps                        | 1.36              | 1.91              | 5.50  | 0.55    | 0.47         | 0.68    | 0.64         |
| Ca, int=0                     | 1.63              | 1.94              | 6.42  | 0.73    | 0.71         | 0.80    | 0.79         |
| Bo                            | 1.24              | 2.36              | 7.11  | 0.55    | 0.51         | 0.59    | 0.57         |
| Bo, Vo                        | 1.98              | 1.91              | 7.56  | 0.57    | 0.50         | 0.70    | 0.67         |
| Bo, Ps, Di, Ba, Ca, Ot, int=0 | 0.45              | 2.77              | 7.85  | 0.97    | 0.95         | 0.97    | 0.96         |
| Bo, Ps, Di                    | 0.51              | 2.76              | 7.88  | 0.86    | 0.82         | 0.82    | 0.78         |
| Ca, Vo, int=0                 | 2.30              | 1.94              | 9.04  | 0.74    | 0.69         | 0.82    | 0.80         |
| Bo, Ps, Di, Ba, Vo, int=0     | 0.56              | 3.01              | 9.37  | 0.97    | 0.95         | 0.96    | 0.95         |
| Bo, Ps, Di, Ba, Vo            | 1.69              | 2.77              | 10.49 | 0.93    | 0.89         | 0.93    | 0.91         |

Ma: product mass; Bo: circuit board mass; Ps: power supply mass; Di: display mass; Ba: battery mass; Ca: casing mass; Ot: other mass; Vo: product volume; int: y-intercept term

**Table S5-I: Model selection results for the top fifteen models.**

The circuit board + display + battery model, which had the third-best score, was selected because its score is very close to that of the model with the second-best score, and it requires one fewer predictor. The circuit board + power supply + display + battery + casing + other model was selected as an illustrative case because it had very low residual error (visible through its high  $R^2$ ) but performed poorly when cross-validated on Apple's dataset. This suggests that the apparent additional precision supplied by adding more terms to that model is due to over fitting.

## **S6. Bills of materials for products analyzed**

This section contains full bills-of-materials (BOM) for each of the 11 products under study and the 3 ecoinvent products compared against. Measurements are the result of primary disassembly and weighing. All parts are identified with a physical description, and mapped to the best-fitting process from a custom-developed listing of appropriate processes. The processes are in turn mapped to ecoinvent processes according to the mapping provided in the final section of this document.

A summary table is provided before each full bill of materials. Parts are categorized as either power supply, casing, circuit boards (excluding IC's), IC's (packages), IC's (die), battery, display, and 'other'; the only non-material impacts considered are transport and assembly. Packaging, exterior parts such as manuals and CDs, production facilities, R&D, and logistics aside from assembly and final ship are all excluded due to non-uniform or missing data. Activities related to use-phase and end-of-life are excluded as out of scope.

Impact assessment results are provided in aggregate by subsystem. The impact values of each line item are not provided in order to protect the copyright of the underlying data source.

## A. Full-size desktop

The product is a Dell Optiplex 780 Minitower desktop, circa 2010 manufacture, with dimensions 41cm x 43cm x 19cm, and total mass 10.7kg, excluding external packaging.

| Category                    | Unit                    | Measurement | GHG (kg CO <sub>2</sub> -eq) | Primary energy (MJ) |
|-----------------------------|-------------------------|-------------|------------------------------|---------------------|
| Power supply (excl. IC's)   | Mass (g)                | 1461        | 40                           | 749                 |
| Casing                      | Mass (g)                | 6171        | 14                           | 255                 |
| Circuit boards (excl. IC's) | Mass (g)                | 1028        | 38                           | 744                 |
| IC's (packages)             | Mass (g)                | 40          | 15                           | 301                 |
| IC's (die)                  | Area (mm <sup>2</sup> ) | 500         | 22                           | 318                 |
| Battery                     | Mass (g)                | 0           | 0                            | 0                   |
| Display                     | Mass (g)                | 0           | 0                            | 0                   |
| Other                       | Mass (g)                | 1959        | 28                           | 502                 |
| Transport                   | Mass (g)                | 10660       | 3                            | 43                  |
| Assembly                    | Products                | 1           | 1                            | 25                  |
| <b>Total</b>                | Mass(g)                 | 10660       | 161                          | 2937                |

Table S6-I: Summary of bill of materials, large desktop

| Subsystem    | Description                       | Process (best fit)                                                 | Unit     | Measurement |
|--------------|-----------------------------------|--------------------------------------------------------------------|----------|-------------|
| Assembly     | Assembly                          | 099-Assembly - large product                                       | Products | 1           |
| Transport    | Transport to regional assembly    | 087-Transport - SE Asia to regional assembly (per g)               | Mass (g) | 10659.7     |
| Power supply | 240W power supply - PCB           | 019-Electronics - PCB (2 layer, bare)                              | Mass (g) | 60          |
| Power supply | Internal power cables             | 082-Electronics - cables - power cords, thick cables and cords     | Mass (g) | 158         |
| Power supply | 24-pin connectors                 | 081-Electronics - connectors - misc. on-board plugs and connectors | Mass (g) | 12          |
| Power supply | Casing, magnetic metal            | 001-Metal - steel (sheet)                                          | Mass (g) | 560         |
| Power supply | Medium case fan 8x8cm 12V 2.6W    | 067-Electronics - components - medium case fan                     | Mass (g) | 91.4        |
| Power supply | Large cylindrical coil 35x23x42mm | 049-Electronics - Inductor, large cylindrical wound                | Mass (g) | 84          |

| Subsystem           | Description                                                | Process (best fit)                                                                                       | Unit     | Measurement |
|---------------------|------------------------------------------------------------|----------------------------------------------------------------------------------------------------------|----------|-------------|
| <b>Power supply</b> | Large cylindrical coil 25x15x20mm                          | 049-Electronics - Inductor, large cylindrical wound                                                      | Mass (g) | 13.3        |
| <b>Power supply</b> | Large cylindrical coil 10x10x11                            | 049-Electronics - Inductor, large cylindrical wound                                                      | Mass (g) | 2.6         |
| <b>Power supply</b> | Toroidal coil 3cm diameter                                 | 047-Electronics - Inductor, toroidal                                                                     | Mass (g) | 55          |
| <b>Power supply</b> | Toroidal coil 3cm diameter                                 | 047-Electronics - Inductor, toroidal                                                                     | Mass (g) | 62          |
| <b>Power supply</b> | Thick wire cylindrical coil 1x2.5cm<br>(diameter x height) | 049-Electronics - Inductor, large cylindrical wound                                                      | Mass (g) | 6.4         |
| <b>Power supply</b> | Thick wire cylindrical coil 1x2.5cm                        | 049-Electronics - Inductor, large cylindrical wound                                                      | Mass (g) | 6.4         |
| <b>Power supply</b> | Thick wire cylindrical coil 7x11mm                         | 049-Electronics - Inductor, large cylindrical wound                                                      | Mass (g) | 3.1         |
| <b>Power supply</b> | Thick wire cylindrical coil 6x8mm                          | 049-Electronics - Inductor, large cylindrical wound                                                      | Mass (g) | 1           |
| <b>Power supply</b> | Secondary board 10x5cm 2-layer                             | 019-Electronics - PCB (2 layer, bare)                                                                    | Mass (g) | 18.3        |
| <b>Power supply</b> | Toroidal coil 2cm diameter                                 | 047-Electronics - Inductor, toroidal                                                                     | Mass (g) | 16.4        |
| <b>Power supply</b> | Toroidal coil 2cm diameter                                 | 047-Electronics - Inductor, toroidal                                                                     | Mass (g) | 16.4        |
| <b>Power supply</b> | Boxed coil 2x2x1cm                                         | 049-Electronics - Inductor, large cylindrical wound                                                      | Mass (g) | 6.8         |
| <b>Power supply</b> | Boxed coil 8x18x15mm                                       | 049-Electronics - Inductor, large cylindrical wound                                                      | Mass (g) | 2.8         |
| <b>Power supply</b> | Boxed coil 16x11x16mm                                      | 049-Electronics - Inductor, large cylindrical wound                                                      | Mass (g) | 3.5         |
| <b>Power supply</b> | Boxed coil 18x4x11mm                                       | 049-Electronics - Inductor, large cylindrical wound                                                      | Mass (g) | 6.3         |
| <b>Power supply</b> | Cap, large ceramic 15x6x15mm                               | 045-Electronics - Capacitor, ceramic (button)                                                            | Mass (g) | 2.5         |
| <b>Power supply</b> | Cap, ceramic 15mm diameter                                 | 045-Electronics - Capacitor, ceramic (button)                                                            | Mass (g) | 1.6         |
| <b>Power supply</b> | Cap, ceramic 8mm diameter                                  | 045-Electronics - Capacitor, ceramic (button)                                                            | Mass (g) | 0.5         |
| <b>Power supply</b> | Cap, ceramic 8mm diameter                                  | 045-Electronics - Capacitor, ceramic (button)                                                            | Mass (g) | 0.5         |
| <b>Power supply</b> | Power transistor 20x3x19mm                                 | 042-Electronics - Transistor, large/power                                                                | Mass (g) | 3.6         |
| <b>Power supply</b> | Cap, ceramic 15mm diameter                                 | 045-Electronics - Capacitor, ceramic (button)                                                            | Mass (g) | 2.3         |
| <b>Power supply</b> | Cap, ceramic 9mm diameter                                  | 045-Electronics - Capacitor, ceramic (button)                                                            | Mass (g) | 0.7         |
| <b>Power supply</b> | Cap, ceramic 9mm diameter                                  | 045-Electronics - Capacitor, ceramic (button)                                                            | Mass (g) | 0.7         |
| <b>Power supply</b> | Cap, electrolytic, 2cm diameter x<br>4.5cm height          | 043-Electronics - Capacitor, electrolytic cylindrical, radial<br>(both leads on the same side) - by mass | Mass (g) | 29.1        |
| <b>Power supply</b> | Cap, electrolytic, 13mmx25mm                               | 043-Electronics - Capacitor, electrolytic cylindrical, radial<br>(both leads on the same side) - by mass | Mass (g) | 4.6         |

| Subsystem           | Description                                                | Process (best fit)                                                                                    | Unit        | Measurement |
|---------------------|------------------------------------------------------------|-------------------------------------------------------------------------------------------------------|-------------|-------------|
| <b>Power supply</b> | Cap, electrolytic, 9x30mm                                  | 043-Electronics - Capacitor, electrolytic cylindrical, radial (both leads on the same side) - by mass | Mass (g)    | 3.3         |
| <b>Power supply</b> | Cap, electrolytic, 10x25mm, 2X@2.8g each                   | 043-Electronics - Capacitor, electrolytic cylindrical, radial (both leads on the same side) - by mass | Mass (g)    | 5.6         |
| <b>Power supply</b> | Cap, electrolytic, 10x21mm, 3X@1.7g each                   | 043-Electronics - Capacitor, electrolytic cylindrical, radial (both leads on the same side) - by mass | Mass (g)    | 5.1         |
| <b>Power supply</b> | Cap, electrolytic, 9x16mm                                  | 043-Electronics - Capacitor, electrolytic cylindrical, radial (both leads on the same side) - by mass | Mass (g)    | 1.6         |
| <b>Power supply</b> | Cap, electrolytic, 8x14mm                                  | 043-Electronics - Capacitor, electrolytic cylindrical, radial (both leads on the same side) - by mass | Mass (g)    | 0.9         |
| <b>Power supply</b> | Cap, electrolytic, 7x13mm                                  | 043-Electronics - Capacitor, electrolytic cylindrical, radial (both leads on the same side) - by mass | Mass (g)    | 0.7         |
| <b>Power supply</b> | Cap, electrolytic, 6x11mm                                  | 043-Electronics - Capacitor, electrolytic cylindrical, radial (both leads on the same side) - by mass | Mass (g)    | 0.6         |
| <b>Power supply</b> | Cap, electrolytic, 5x11mm, 7X@0.4g each                    | 043-Electronics - Capacitor, electrolytic cylindrical, radial (both leads on the same side) - by mass | Mass (g)    | 2.8         |
| <b>Power supply</b> | Power transistor 9x4x9mm, 13X @ 2.0g each                  | 042-Electronics - Transistor, large/power                                                             | Mass (g)    | 26          |
| <b>Power supply</b> | Heat spreaders - gray non-magnetic metal                   | 006-Metal - aluminum heatsink                                                                         | Mass (g)    | 108.9       |
| <b>Power supply</b> | Small SMT IC's, 2X 16-pin @ 1.1g each                      | 039-Electronics - IC, medium SMT, < 64 pin                                                            | Mass (g)    | 2.2         |
| <b>Power supply</b> | Silicon die, by mass ratio                                 | 095-Silicon die - 2007 process (65 nm)                                                                | Area (mm^2) | 40.48       |
| <b>Power supply</b> | Tiny SMT IC's                                              | 040-Electronics - IC, tiny < 0.1g                                                                     | Mass (g)    | 1.4         |
| <b>Power supply</b> | Power resistors 2X @ 3.8g each, 7mm diameter x 24mm length | 051-Electronics - Resistor, large (power)                                                             | Mass (g)    | 7.6         |
| <b>Power supply</b> | Power resistors 3X @0.6g each 11mm length                  | 051-Electronics - Resistor, large (power)                                                             | Mass (g)    | 1.8         |
| <b>Power supply</b> | Power resistors 3X @0.25g each 8mm length                  | 051-Electronics - Resistor, large (power)                                                             | Mass (g)    | 0.75        |
| <b>Power supply</b> | Power resistors 4X @0.1g each 7mm length                   | 051-Electronics - Resistor, large (power)                                                             | Mass (g)    | 0.4         |

| Subsystem            | Description                                                | Process (best fit)                                                                                    | Unit            | Measurement    |
|----------------------|------------------------------------------------------------|-------------------------------------------------------------------------------------------------------|-----------------|----------------|
| <b>Power supply</b>  | Power diode 3X @ 0.7g each 8mm length                      | 050-Electronics - Diode, large (power)                                                                | Mass (g)        | 2.1            |
| <b>Power supply</b>  | Power diode 5X @ 0.2g each 4 to 6mm length                 | 050-Electronics - Diode, large (power)                                                                | Mass (g)        | 1              |
| <b>Power supply</b>  | Toroidal coil (small)                                      | 047-Electronics - Inductor, toroidal                                                                  | Mass (g)        | 2.3            |
| <b>Power supply</b>  | Small cables/wires                                         | 084-Electronics - cables - small cables and wires                                                     | Mass (g)        | 11             |
| <b>Power supply</b>  | AC power plug                                              | 075-Electronics - ports - AC power plug                                                               | Mass (g)        | 13.6           |
| <b>Power supply</b>  | White epoxy blobs                                          | 016-Plastic - epoxy                                                                                   | Mass (g)        | 3.4            |
| <b>Power supply</b>  | Rubber/plastic wrapping                                    | 012-Plastic - silicone rubber                                                                         | Mass (g)        | 1.6            |
| <b>Power supply</b>  | Small plastic connector/plug                               | 081-Electronics - connectors - misc. on-board plugs and connectors                                    | Mass (g)        | 1.5            |
| <b>Power supply</b>  | Metal screws                                               | 002-Metal - steel (screws)                                                                            | Mass (g)        | 9              |
| <b>Power supply</b>  | Foam padding                                               | 015-Plastic - polyurethane foam (packaging)                                                           | Mass (g)        | 1              |
| <b>Power supply</b>  | Clear stiff plastic piece                                  | 008-Plastic - ABS                                                                                     | Mass (g)        | 2              |
| <b>Power supply</b>  | Hard plastic piece                                         | 008-Plastic - ABS                                                                                     | Mass (g)        | 3.2            |
| <b>Power supply</b>  | Remaining bits                                             | 040-Electronics - IC, tiny < 0.1g                                                                     | Mass (g)        | 8              |
| <b>Power supply</b>  | <b>Subtotal: Power supply (excl IC's)</b>                  |                                                                                                       | <b>Mass (g)</b> | <b>1461.15</b> |
| <b>Graphics card</b> | ATI Radeon. Bare PCB 12 layer 17x6cm                       | 024-Electronics - PCB (12 layer, bare)                                                                | Mass (g)        | 43.9           |
| <b>Graphics card</b> | ATI GPU. Mounted bare die 644-pin, 25x25mm PCB, 7x9mm die. | 033-Electronics - IC, large BGA (mounted bare die, 672 pin)                                           | Mass (g)        | 1.5            |
| <b>Graphics card</b> | Silicon die, exposed                                       | 095-Silicon die - 2007 process (65 nm)                                                                | Area (mm^2)     | 63             |
| <b>Graphics card</b> | Video RAM, 82-pin, 8x14mm, 4@0.2g each                     | 037-Electronics - IC, packaged RAM chip                                                               | Mass (g)        | 0.8            |
| <b>Graphics card</b> | Silicon die, by area ratio                                 | 095-Silicon die - 2007 process (65 nm)                                                                | Area (mm^2)     | 34.944         |
| <b>Graphics card</b> | Small SMT IC's 8 to 16 pin, 13X, 0.8g total                | 039-Electronics - IC, medium SMT, < 64 pin                                                            | Mass (g)        | 0.8            |
| <b>Graphics card</b> | Silicon die, by mass ratio                                 | 095-Silicon die - 2007 process (65 nm)                                                                | Area (mm^2)     | 14.72          |
| <b>Graphics card</b> | Cap, electrolytic, 8mm dia x 14mm height                   | 043-Electronics - Capacitor, electrolytic cylindrical, radial (both leads on the same side) - by mass | Mass (g)        | 1.5            |



| Subsystem     | Description                                      | Process (best fit)                                                                                    | Unit        | Measurement |
|---------------|--------------------------------------------------|-------------------------------------------------------------------------------------------------------|-------------|-------------|
| Graphics card | Cap, electrolytic, 6x8                           | 043-Electronics - Capacitor, electrolytic cylindrical, radial (both leads on the same side) - by mass | Mass (g)    | 0.5         |
| Graphics card | Cap, electrolytic, 6x8                           | 043-Electronics - Capacitor, electrolytic cylindrical, radial (both leads on the same side) - by mass | Mass (g)    | 0.4         |
| Graphics card | Small wound coils, thick wire: 8x10mm            | 049-Electronics - Inductor, large cylindrical wound                                                   | Mass (g)    | 2.4         |
| Graphics card | Small wound coils, thick wire: 8x5mm             | 049-Electronics - Inductor, large cylindrical wound                                                   | Mass (g)    | 1.2         |
| Graphics card | Small wound coils, thick wire: 4x4mm             | 049-Electronics - Inductor, large cylindrical wound                                                   | Mass (g)    | 0.4         |
| Graphics card | S-video port                                     | 072-Electronics - ports - video multi-pin                                                             | Mass (g)    | 4.1         |
| Graphics card | DVI port                                         | 072-Electronics - ports - video multi-pin                                                             | Mass (g)    | 10.3        |
| Graphics card | Small connector                                  | 081-Electronics - connectors - misc. on-board plugs and connectors                                    | Mass (g)    | 0.1         |
| Graphics card | Tiny IC's                                        | 040-Electronics - IC, tiny < 0.1g                                                                     | Mass (g)    | 1           |
| Graphics card | Front plate - magnetic metal                     | 001-Metal - steel (sheet)                                                                             | Mass (g)    | 15.1        |
| Graphics card | Back brace for man connector - magnetic metal    | 001-Metal - steel (sheet)                                                                             | Mass (g)    | 3.6         |
| Graphics card | Metal screws                                     | 002-Metal - steel (screws)                                                                            | Mass (g)    | 3           |
| Graphics card | Heat sink - black coated metal non-magnetic      | 006-Metal - aluminum heat sink                                                                        | Mass (g)    | 29.5        |
| Graphics card | Clear plastic cover - polycarbonate ("PC" label) | 010-Plastic - PC                                                                                      | Mass (g)    | 9.7         |
| Graphics card | CPU fan - 12V DV 2.3W - 4.5cm diameter           | 065-Electronics - components - small CPU fan                                                          | Mass (g)    | 11.2        |
| Mainboard     | Main logic board - 10 layer - 26.5x26.5cm        | 024-Electronics - PCB (12 layer, bare)                                                                | Mass (g)    | 247         |
| RAM           | RAM IC's - 8X @ 0.15g each, 78-pin 8x11mm        | 037-Electronics - IC, packaged RAM chip                                                               | Mass (g)    | 1.2         |
| RAM           | Silicon die, by area ratio                       | 095-Silicon die - 2007 process (65 nm)                                                                | Area (mm^2) | 54.912      |
| RAM           | RAM: PCB - 13.3x3cm, 4 Layer                     | 020-Electronics - PCB (4 layer, bare)                                                                 | Mass (g)    | 13.2        |
| Mainboard     | 2xUSB + Ethernet port                            | 073-Electronics - ports - small metal (USB, firewire, ethernet)                                       | Mass (g)    | 15          |

| Subsystem | Description                                   | Process (best fit)                                                                                    | Unit     | Measurement |
|-----------|-----------------------------------------------|-------------------------------------------------------------------------------------------------------|----------|-------------|
| Mainboard | VGA+serial port                               | 072-Electronics - ports - video multi-pin                                                             | Mass (g) | 26.1        |
| Mainboard | 2x audio port                                 | 073-Electronics - ports - small metal (USB, firewire, ethernet)                                       | Mass (g) | 9.6         |
| Mainboard | 4x USB port                                   | 073-Electronics - ports - small metal (USB, firewire, ethernet)                                       | Mass (g) | 16.9        |
| Mainboard | Parallel port                                 | 072-Electronics - ports - video multi-pin                                                             | Mass (g) | 24          |
| Mainboard | Firewire port, 2X @ 2.2g each                 | 073-Electronics - ports - small metal (USB, firewire, ethernet)                                       | Mass (g) | 4.4         |
| Mainboard | Firewire port                                 | 073-Electronics - ports - small metal (USB, firewire, ethernet)                                       | Mass (g) | 1           |
| Mainboard | RAM slots 14cm, 2X @ 19g each                 | 076-Electronics - connectors - full-size RAM slot                                                     | Mass (g) | 38          |
| Mainboard | PCI-type slots - 2X @ 12.2g each              | 079-Electronics - connectors - PCI-type slot                                                          | Mass (g) | 24.4        |
| Mainboard | Video (AGP) slot                              | 078-Electronics - connectors - video card slot                                                        | Mass (g) | 7.1         |
| Mainboard | On-board connectors and plug                  | 081-Electronics - connectors - misc. on-board plugs and connectors                                    | Mass (g) | 20.2        |
| Mainboard | Cap, electrolytic, 7x20mm: 4X @ 1.6g each     | 043-Electronics - Capacitor, electrolytic cylindrical, radial (both leads on the same side) - by mass | Mass (g) | 6.4         |
| Mainboard | Cap, electrolytic, 9x12mm: 2X @ 1.2g each     | 043-Electronics - Capacitor, electrolytic cylindrical, radial (both leads on the same side) - by mass | Mass (g) | 2.4         |
| Mainboard | Cap, electrolytic, 7x9mm: 7x @ 0.5 each       | 043-Electronics - Capacitor, electrolytic cylindrical, radial (both leads on the same side) - by mass | Mass (g) | 3.5         |
| Mainboard | Cap, electrolytic, 7x12mm: 8x @ 1.0 each      | 043-Electronics - Capacitor, electrolytic cylindrical, radial (both leads on the same side) - by mass | Mass (g) | 8           |
| Mainboard | Cap, electrolytic, 6x12mm: 24x @ 0.5 each     | 043-Electronics - Capacitor, electrolytic cylindrical, radial (both leads on the same side) - by mass | Mass (g) | 12          |
| Mainboard | Cap, electrolytic, 5x11mm: 2x @ 0.4 each      | 043-Electronics - Capacitor, electrolytic cylindrical, radial (both leads on the same side) - by mass | Mass (g) | 0.8         |
| Mainboard | Coil, toroidal: 13mm diameter, 2X @ 5.8g each | 047-Electronics - Inductor, toroidal                                                                  | Mass (g) | 11.6        |
| Mainboard | Coil, toroidal: 11mm diameter, 3X @ 3.2g each | 047-Electronics - Inductor, toroidal                                                                  | Mass (g) | 9.6         |

| Subsystem            | Description                                                                                     | Process (best fit)                                                  | Unit        | Measurement |
|----------------------|-------------------------------------------------------------------------------------------------|---------------------------------------------------------------------|-------------|-------------|
| <b>Mainboard</b>     | Coil, toroidal: 8mm diameter, 2X @ 1.2g each                                                    | 047-Electronics - Inductor, toroidal                                | Mass (g)    | 2.4         |
| <b>Mainboard</b>     | Intel Pentium E5800 3.2 Ghz; Mounted with heat spreader, 777-pin, 37x37mm PCB, 35x35mm spreader | 030-Electronics - IC, large BGA (with heat spreader, 672 pin)       | Mass (g)    | 23.6        |
| <b>Mainboard</b>     | Silicon die, by area ratio                                                                      | 095-Silicon die - 2007 process (65 nm)                              | Area (mm^2) | 106.782     |
| <b>Mainboard</b>     | 1225-pin mounted bare die, 39x39mm PCB, 11x9mm die                                              | 033-Electronics - IC, large BGA (mounted bare die, 672 pin)         | Mass (g)    | 3.9         |
| <b>Mainboard</b>     | Silicon die, exposed                                                                            | 095-Silicon die - 2007 process (65 nm)                              | Area (mm^2) | 99          |
| <b>Mainboard</b>     | 652-pin mounted package; 31x31mm PCB, 26x26mm package                                           | 027-Electronics - IC, large BGA (mounted, plastic package, 672 pin) | Mass (g)    | 3.8         |
| <b>Mainboard</b>     | Silicon die, by area ratio                                                                      | 095-Silicon die - 2007 process (65 nm)                              | Area (mm^2) | 52.728      |
| <b>Mainboard</b>     | CPU socket - magnetic metal                                                                     | 001-Metal - steel (sheet)                                           | Mass (g)    | 25.6        |
| <b>Mainboard</b>     | CPU socket - plastic seat                                                                       | 008-Plastic - ABS                                                   | Mass (g)    | 6.9         |
| <b>Mainboard</b>     | CPU heatsink - white non-mag metal                                                              | 006-Metal - aluminum heatsink                                       | Mass (g)    | 256.3       |
| <b>Mainboard</b>     | Secondary chip heatsink - white non-mag metal                                                   | 006-Metal - aluminum heatsink                                       | Mass (g)    | 34.3        |
| <b>Mainboard</b>     | 128-pin SMT, 14x20mm                                                                            | 038-Electronics - IC, medium SMT, >= 64 pin                         | Mass (g)    | 1.7         |
| <b>Mainboard</b>     | 56-pin SMT, 14x6mm                                                                              | 039-Electronics - IC, medium SMT, < 64 pin                          | Mass (g)    | 0.3         |
| <b>Mainboard</b>     | 16-pn SMT, 7x10mm                                                                               | 039-Electronics - IC, medium SMT, < 64 pin                          | Mass (g)    | 0.4         |
| <b>Mainboard</b>     | Silicon die, by area ratio                                                                      | 095-Silicon die - 2007 process (65 nm)                              | Area (mm^2) | 33.852      |
| <b>Mainboard</b>     | Transistors 6x6mm, 21X @ 0.33g each                                                             | 041-Electronics - Transistor, small                                 | Mass (g)    | 6.93        |
| <b>Mainboard</b>     | Crystal oscillator                                                                              | 085-Electronics - crystal oscillator                                | Mass (g)    | 0.4         |
| <b>Mainboard</b>     | CR2032 3V Li battery                                                                            | 056-Battery - CR2032 3V Li-Ion (CMOS)                               | Mass (g)    | 2.7         |
| <b>Mainboard</b>     | Buzzer - KPM1205A                                                                               | 071-Electronics - components - speaker                              | Mass (g)    | 1.3         |
| <b>Mainboard</b>     | Small IC's and little bits                                                                      | 040-Electronics - IC, tiny < 0.1g                                   | Mass (g)    | 8.2         |
| <b>Daughtercards</b> | Small PCB: 4x12.5cm, 2 layer                                                                    | 019-Electronics - PCB (2 layer, bare)                               | Mass (g)    | 21.1        |
| <b>Daughtercards</b> | USB port: 2X @ 3g each                                                                          | 073-Electronics - ports - small metal (USB, firewire,               | Mass (g)    | 6           |

| Subsystem             | Description                                      | Process (best fit)                                                                                    | Unit            | Measurement    |
|-----------------------|--------------------------------------------------|-------------------------------------------------------------------------------------------------------|-----------------|----------------|
|                       |                                                  | ethernet)                                                                                             |                 |                |
| <b>Daughtercards</b>  | Audio port: 2X @ 2.4g each                       | 073-Electronics - ports - small metal (USB, firewire, ethernet)                                       | Mass (g)        | 4.8            |
| <b>Daughtercards</b>  | Cap, electrolytic, 6x12mm: 3X @ 0.6g each        | 043-Electronics - Capacitor, electrolytic cylindrical, radial (both leads on the same side) - by mass | Mass (g)        | 1.8            |
| <b>Daughtercards</b>  | Misc. connectors                                 | 081-Electronics - connectors - misc. on-board plugs and connectors                                    | Mass (g)        | 3.9            |
| <b>Daughtercards</b>  | Ribbon cable 40 cm                               | 083-Electronics - cables - large ribbon cables                                                        | Mass (g)        | 49             |
|                       | <b>Subtotal: Circuit boards (total)</b>          |                                                                                                       | <b>Mass (g)</b> | <b>1068.25</b> |
|                       | <b>Subtotal: Circuit boards (excluding IC's)</b> |                                                                                                       | <b>Mass (g)</b> | <b>1028.05</b> |
| <b>Interior parts</b> | Plastic heatsink airflow ducting "PC + 20% GF"   | 010-Plastic - PC                                                                                      | Mass (g)        | 145            |
| <b>Interior parts</b> | Front-plating: ABS plastic                       | 008-Plastic - ABS                                                                                     | Mass (g)        | 86             |
| <b>Interior parts</b> | Fan housing: "PC + 20% GF"                       | 010-Plastic - PC                                                                                      | Mass (g)        | 171            |
| <b>Interior parts</b> | Large case fan: 12x12cm, 12V 0.9A (10.8W)        | 068-Electronics - components - large case fan                                                         | Mass (g)        | 215            |
| <b>Interior parts</b> | Blue plastic piece "PC + ABS - FR(40)"           | 009-Plastic - ABS + PC blend                                                                          | Mass (g)        | 18             |
| <b>Interior parts</b> | Plastic piece ABS                                | 008-Plastic - ABS                                                                                     | Mass (g)        | 11             |
| <b>Interior parts</b> | Metal piece magnetic                             | 001-Metal - steel (sheet)                                                                             | Mass (g)        | 11             |
| <b>Interior parts</b> | Plastic piece PC+20%GF                           | 010-Plastic - PC                                                                                      | Mass (g)        | 14             |
| <b>Interior parts</b> | Plastic piece PC+ABS-FR40K                       | 009-Plastic - ABS + PC blend                                                                          | Mass (g)        | 40             |
| <b>Interior parts</b> | Plastic piece PC+ABS-FR40K                       | 009-Plastic - ABS + PC blend                                                                          | Mass (g)        | 3.5            |
| <b>Interior parts</b> | Plastic piece - clear plastic                    | 015-Plastic - polyurethane foam (packaging)                                                           | Mass (g)        | 4.8            |
| <b>Interior parts</b> | Hard drive: 4", 10x15x2.5 cm                     | 062-Electronics - components - full-size hard disk                                                    | Mass (g)        | 447            |
| <b>Interior parts</b> | DVD+RW drive, 14.5x17x4cm                        | 061-Electronics - components - DVD drive                                                              | Mass (g)        | 690            |
| <b>Interior parts</b> | Small metal bits - magnetic                      | 001-Metal - steel (sheet)                                                                             | Mass (g)        | 61             |
| <b>Interior parts</b> | Power cables - 130cm                             | 084-Electronics - cables - small cables and wires                                                     | Mass (g)        | 42             |
| <b>Interior parts</b> | <b>Subtotal: Other</b>                           |                                                                                                       | <b>Mass (g)</b> | <b>1959.3</b>  |

| Subsystem     | Description                      | Process (best fit)         | Unit               | Measurement    |
|---------------|----------------------------------|----------------------------|--------------------|----------------|
| <b>Casing</b> | Interior frame, magnetic metal   | 001-Metal - steel (sheet)  | Mass (g)           | 4260           |
| <b>Casing</b> | Side panel, magnetic metal       | 001-Metal - steel (sheet)  | Mass (g)           | 1250           |
| <b>Casing</b> | Plastic panels "ABS"             | 008-Plastic - ABS          | Mass (g)           | 640            |
| <b>Casing</b> | Metal screws                     | 002-Metal - steel (screws) | Mass (g)           | 21             |
| <b>Casing</b> | <b>Subtotal: Casing</b>          |                            | <b>Mass (g)</b>    | <b>6171</b>    |
|               |                                  |                            |                    |                |
|               | <b>Subtotal: IC's (packaged)</b> |                            | <b>Mass (g)</b>    | <b>40.2</b>    |
|               | <b>Subtotal: IC's (die)</b>      |                            | <b>Area (mm^2)</b> | <b>500.418</b> |
|               |                                  |                            |                    | 0              |
|               | <b>Total</b>                     |                            | <b>Mass(g)</b>     | <b>10659.7</b> |

Table S6-II: Full bill of materials, large desktop

## B. Small desktop

The product is a Dell Optiplex 780 Ultra-Small Form Factor (USFF) desktop, circa 2010 manufacture, with dimensions 24x23.5x6.5cm, and total mass 2.97kg, excluding external packaging.

| Category                    | Unit                    | Measurement | GHG (kg CO <sub>2</sub> -eq) | Primary energy (MJ) |
|-----------------------------|-------------------------|-------------|------------------------------|---------------------|
| Power supply (excl. IC's)   | Mass (g)                | 476         | 17.2                         | 314.1               |
| Casing                      | Mass (g)                | 1258        | 2.9                          | 48.5                |
| Circuit boards (excl. IC's) | Mass (g)                | 407         | 23.7                         | 439.0               |
| IC's (packages)             | Mass (g)                | 35          | 11.2                         | 229.0               |
| IC's (die)                  | Area (mm <sup>2</sup> ) | 218         | 9.4                          | 138.4               |
| Battery                     | Mass (g)                | 0           | 0                            | 0                   |
| Display                     | Mass (g)                | 0           | 0                            | 0                   |
| Other                       | Mass (g)                | 796         | 7.2                          | 131.9               |
| Transport                   | Mass (g)                | 2972        | 0.8                          | 12.1                |
| Assembly                    | Products                | 1           | 1.2                          | 25.3                |
| Total                       | Mass(g)                 | 2972        | 73.5                         | 1338.3              |

Table S6-III: Summary of bill of materials, small desktop

| Subsystem | Description                                                           | Process (best fit)                                   | Unit                    | Measurement |
|-----------|-----------------------------------------------------------------------|------------------------------------------------------|-------------------------|-------------|
| Assembly  | Assembly                                                              | 099-Assembly - large component                       | Product                 | 1           |
| Transport | Transport to regional assembly                                        | 087-Transport - SE Asia to regional assembly (per g) | Mass (g)                | 3020        |
| Mainboard | Mainboard: 3V CR2032 Li battery                                       | 056-Battery - CR2032 3V Li-Ion (CMOS)                | Mass (g)                | 3           |
| Mainboard | Mainboard: Main logic board - 20.5x22cm - 15cm <sup>2</sup> - 8 layer | 022-Electronics - PCB (8 layer, bare)                | Mass (g)                | 180         |
| RAM       | RAM: PCB - 13.3x3cm, 4 Layer                                          | 020-Electronics - PCB (4 layer, bare)                | Mass (g)                | 13          |
| RAM       | RAM: IC's, 8x, 1.4g total                                             | 037-Electronics - IC, packaged RAM chip              | Mass (g)                | 1           |
| RAM       | Silicon die, by mass ratio                                            | 095-Silicon die - 2007 process (65 nm)               | Area (mm <sup>2</sup> ) | 26          |

| Subsystem | Description                                         | Process (best fit)                                                                                    | Unit     | Measurement |
|-----------|-----------------------------------------------------|-------------------------------------------------------------------------------------------------------|----------|-------------|
| Mainboard | Plastic CR-2032 battery housing                     | 009-Plastic - ABS + PC blend                                                                          | Mass (g) | 2           |
| Mainboard | Serial port                                         | 072-Electronics - ports - video multi-pin                                                             | Mass (g) | 6           |
| Mainboard | VGA port                                            | 072-Electronics - ports - video multi-pin                                                             | Mass (g) | 7           |
| Mainboard | Double-USB port                                     | 073-Electronics - ports - small metal (USB, firewire, ethernet)                                       | Mass (g) | 5           |
| Mainboard | Double-USB+ethernet port                            | 073-Electronics - ports - small metal (USB, firewire, ethernet)                                       | Mass (g) | 15          |
| Mainboard | Audio port                                          | 073-Electronics - ports - small metal (USB, firewire, ethernet)                                       | Mass (g) | 2           |
| Mainboard | Audio port                                          | 073-Electronics - ports - small metal (USB, firewire, ethernet)                                       | Mass (g) | 2           |
| Mainboard | RAM slot (13cm)                                     | 076-Electronics - connectors - full-size RAM slot                                                     | Mass (g) | 10          |
| Mainboard | RAM slot (13cm)                                     | 076-Electronics - connectors - full-size RAM slot                                                     | Mass (g) | 10          |
| Mainboard | Power plug, on-board 8-pin                          | 081-Electronics - connectors - misc. on-board plugs and connectors                                    | Mass (g) | 2           |
| Mainboard | Power plug, on-board 4-pin                          | 081-Electronics - connectors - misc. on-board plugs and connectors                                    | Mass (g) | 1           |
| Mainboard | Firewire port                                       | 073-Electronics - ports - small metal (USB, firewire, ethernet)                                       | Mass (g) | 2           |
| Mainboard | Firewire port                                       | 073-Electronics - ports - small metal (USB, firewire, ethernet)                                       | Mass (g) | 2           |
| Mainboard | USB port                                            | 073-Electronics - ports - small metal (USB, firewire, ethernet)                                       | Mass (g) | 2           |
| Mainboard | Jumpers                                             | 081-Electronics - connectors - misc. on-board plugs and connectors                                    | Mass (g) | 5           |
| Mainboard | Ribbon plug                                         | 081-Electronics - connectors - misc. on-board plugs and connectors                                    | Mass (g) | 1           |
| Mainboard | Small other connector bits from mainboard           | 081-Electronics - connectors - misc. on-board plugs and connectors                                    | Mass (g) | 0           |
| Mainboard | Caps - electrolytic - 9mm diameter 11mm height - 4X | 043-Electronics - Capacitor, electrolytic cylindrical, radial (both leads on the same side) - by mass | Mass (g) | 5           |

| Subsystem             | Description                                                                                               | Process (best fit)                                                                                    | Unit        | Measurement |
|-----------------------|-----------------------------------------------------------------------------------------------------------|-------------------------------------------------------------------------------------------------------|-------------|-------------|
| <b>Mainboard</b>      | Caps - electrolytic - 6mm diameter 8mm height - 13X                                                       | 043-Electronics - Capacitor, electrolytic cylindrical, radial (both leads on the same side) - by mass | Mass (g)    | 6           |
| <b>Mainboard</b>      | Coils - large cylindrical - 11x11x8mm, 4X                                                                 | 049-Electronics - Inductor, large cylindrical wound                                                   | Mass (g)    | 21          |
| <b>Mainboard</b>      | Coils - large cylindrical - 10x7x9mm, 3X                                                                  | 049-Electronics - Inductor, large cylindrical wound                                                   | Mass (g)    | 8           |
| <b>Mainboard</b>      | Coils - toroidal                                                                                          | 047-Electronics - Inductor, toroidal                                                                  | Mass (g)    | 1           |
| <b>Mainboard</b>      | Small heatsink - grey metal non-magnetic                                                                  | 006-Metal - aluminum heatsink                                                                         | Mass (g)    | 37          |
| <b>Mainboard</b>      | CPU socket - magnetic metal                                                                               | 001-Metal - steel (sheet)                                                                             | Mass (g)    | 33          |
| <b>Mainboard</b>      | CPU - Intel Celeron 2.2Ghz/512/800/86; 985-pin mounted with heat spreader; 38x38mm, 34x34mm heat spreader | 030-Electronics - IC, large BGA (with heat spreader, 672 pin)                                         | Mass (g)    | 24          |
| <b>Mainboard</b>      | Large IC mounted die 1181-pin, 34x34mm PCB, 9x11mm die                                                    | 033-Electronics - IC, large BGA (mounted bare die, 672 pin)                                           | Mass (g)    | 4           |
| <b>Mainboard</b>      | Silicon die, exposed                                                                                      | 095-Silicon die - 2007 process (65 nm)                                                                | Area (mm^2) | 99          |
| <b>Mainboard</b>      | Intel AF82801JD0 mounted package 160-pin 31x31mm PCB 25x25mm package                                      | 025-Electronics - IC, large BGA (mounted, plastic package, 144 pin)                                   | Mass (g)    | 4           |
| <b>Mainboard</b>      | Silicon die, by area ratio                                                                                | 095-Silicon die - 2007 process (65 nm)                                                                | Area (mm^2) | 49          |
| <b>Mainboard</b>      | 138-pin SMT 20x14mm                                                                                       | 038-Electronics - IC, medium SMT, >= 64 pin                                                           | Mass (g)    | 2           |
| <b>Mainboard</b>      | 16-pin SMT                                                                                                | 039-Electronics - IC, medium SMT, < 64 pin                                                            | Mass (g)    | 0           |
| <b>Mainboard</b>      | 56-pin SMT                                                                                                | 039-Electronics - IC, medium SMT, < 64 pin                                                            | Mass (g)    | 0           |
| <b>Mainboard</b>      | 28-pin SMT                                                                                                | 039-Electronics - IC, medium SMT, < 64 pin                                                            | Mass (g)    | 0           |
| <b>Mainboard</b>      | Silicon die, by mass ratio                                                                                | 095-Silicon die - 2007 process (65 nm)                                                                | Area (mm^2) | 44          |
| <b>Mainboard</b>      | Tiny bits and IC's                                                                                        | 040-Electronics - IC, tiny < 0.1g                                                                     | Mass (g)    | 10          |
| <b>Daughterboards</b> | Small PCB 10x2cm 2-layer                                                                                  | 019-Electronics - PCB (2 layer, bare)                                                                 | Mass (g)    | 8           |
| <b>Daughterboards</b> | USB port, 2x 2.1g each                                                                                    | 073-Electronics - ports - small metal (USB, firewire,                                                 | Mass (g)    | 4           |



| Subsystem             | Description                                                  | Process (best fit)                                              | Unit            | Measurement |
|-----------------------|--------------------------------------------------------------|-----------------------------------------------------------------|-----------------|-------------|
|                       |                                                              | ethernet)                                                       |                 |             |
| <b>Daughtercards</b>  | Audio port, 2x1.7g each                                      | 073-Electronics - ports - small metal (USB, firewire, ethernet) | Mass (g)        | 3           |
|                       | <b>Subtotal: Circuit boards (total)</b>                      |                                                                 | <b>Mass (g)</b> | <b>442</b>  |
|                       | <b>Subtotal: Circuit boards (excluding IC's)</b>             |                                                                 | <b>Mass (g)</b> | <b>407</b>  |
| <b>Casing</b>         | Front plate ABS plastic                                      | 008-Plastic - ABS                                               | Mass (g)        | 63          |
| <b>Casing</b>         | Main frame piece, magnetic metal                             | 001-Metal - steel (sheet)                                       | Mass (g)        | 840         |
| <b>Casing</b>         | Side piece, magnetic metal                                   | 001-Metal - steel (sheet)                                       | Mass (g)        | 330         |
| <b>Casing</b>         | Screws                                                       | 002-Metal - steel (screws)                                      | Mass (g)        | 25          |
|                       | <b>Subtotal: Casing</b>                                      |                                                                 | <b>Mass (g)</b> | <b>1258</b> |
| <b>Interior parts</b> | Medium case fan - 6x6x2cm                                    | 067-Electronics - components - medium case fan                  | Mass (g)        | 62          |
| <b>Interior parts</b> | Ribbon cables                                                | 083-Electronics - cables - large ribbon cables                  | Mass (g)        | 18          |
| <b>Interior parts</b> | Metal plate - magnetic                                       | 001-Metal - steel (sheet)                                       | Mass (g)        | 21          |
| <b>Interior parts</b> | Hard drive 2.5" (laptop size) 250GB SATA 7200 RPM            | 063-Electronics - components - laptop-size hard disk            | Mass (g)        | 106         |
| <b>Interior parts</b> | HD carriage, magnetic metal                                  | 001-Metal - steel (sheet)                                       | Mass (g)        | 267         |
| <b>Interior parts</b> | Main heatsink - welded metal, approx. 20% copper             | 007-Metal - copper heatsink                                     | Mass (g)        | 51          |
| <b>Interior parts</b> | Main heatsink - welded metal, approx. 80% non-magnetic metal | 006-Metal - aluminum heatsink                                   | Mass (g)        | 205         |
| <b>Interior parts</b> | Heatsink front plate - magnetic metal                        | 001-Metal - steel (sheet)                                       | Mass (g)        | 24          |
| <b>Interior parts</b> | Medium case fan - 7cm diameter                               | 067-Electronics - components - medium case fan                  | Mass (g)        | 42          |
|                       | <b>Subtotal: Other</b>                                       |                                                                 | <b>Mass (g)</b> | <b>796</b>  |
| <b>Power supply</b>   | 180W internal power supply - PCB, 7x15cm 2 layer             | 019-Electronics - PCB (2 layer, bare)                           | Mass (g)        | 30          |
| <b>Power supply</b>   | Tiny IC's                                                    | 040-Electronics - IC, tiny < 0.1g                               | Mass (g)        | 10          |
| <b>Power supply</b>   | Stiff clear plastic                                          | 015-Plastic - polyurethane foam (packaging)                     | Mass (g)        | 6           |

| Subsystem           | Description                                      | Process (best fit)                                                                                    | Unit     | Measurement |
|---------------------|--------------------------------------------------|-------------------------------------------------------------------------------------------------------|----------|-------------|
| <b>Power supply</b> | Casing, magnetic metal                           | 001-Metal - steel (sheet)                                                                             | Mass (g) | 216         |
| <b>Power supply</b> | Coil, large cylindrical - 3x2.5x1.8cm            | 049-Electronics - Inductor, large cylindrical wound                                                   | Mass (g) | 42          |
| <b>Power supply</b> | Coil, large cylindrical - 1.5x2.3x2.2            | 049-Electronics - Inductor, large cylindrical wound                                                   | Mass (g) | 30          |
| <b>Power supply</b> | Coil, large cylindrical - 1.1x1.7x2.1cm          | 049-Electronics - Inductor, large cylindrical wound                                                   | Mass (g) | 7           |
| <b>Power supply</b> | Coil, large cylindrical - 2.5x1.6x1.7cm          | 049-Electronics - Inductor, large cylindrical wound                                                   | Mass (g) | 27          |
| <b>Power supply</b> | Coil, large cylindrical - 1.8x1x1cm              | 049-Electronics - Inductor, large cylindrical wound                                                   | Mass (g) | 11          |
| <b>Power supply</b> | Coil, large cylindrical - 6x21x15mm              | 049-Electronics - Inductor, large cylindrical wound                                                   | Mass (g) | 4           |
| <b>Power supply</b> | Coil, large cylindrical - 7x27x20mm              | 049-Electronics - Inductor, large cylindrical wound                                                   | Mass (g) | 4           |
| <b>Power supply</b> | Caps, electrolytic - 30mm diameter x 20mm height | 043-Electronics - Capacitor, electrolytic cylindrical, radial (both leads on the same side) - by mass | Mass (g) | 18          |
| <b>Power supply</b> | Caps, electrolyte - 10x15mm                      | 043-Electronics - Capacitor, electrolytic cylindrical, radial (both leads on the same side) - by mass | Mass (g) | 2           |
| <b>Power supply</b> | Caps, electrolyte - 8x15mm                       | 043-Electronics - Capacitor, electrolytic cylindrical, radial (both leads on the same side) - by mass | Mass (g) | 1           |
| <b>Power supply</b> | Caps, electrolyte - 8x15mm                       | 043-Electronics - Capacitor, electrolytic cylindrical, radial (both leads on the same side) - by mass | Mass (g) | 1           |
| <b>Power supply</b> | Caps, electrolyte - 6x12mm                       | 043-Electronics - Capacitor, electrolytic cylindrical, radial (both leads on the same side) - by mass | Mass (g) | 1           |
| <b>Power supply</b> | Caps, electrolyte - 6x11mm                       | 043-Electronics - Capacitor, electrolytic cylindrical, radial (both leads on the same side) - by mass | Mass (g) | 1           |
| <b>Power supply</b> | Caps, electrolyte - 5x11mm                       | 043-Electronics - Capacitor, electrolytic cylindrical, radial (both leads on the same side) - by mass | Mass (g) | 0           |
| <b>Power supply</b> | Caps, electrolyte - 5x12mm                       | 043-Electronics - Capacitor, electrolytic cylindrical, radial (both leads on the same side) - by mass | Mass (g) | 0           |
| <b>Power supply</b> | Caps, electrolyte - 8x11mm                       | 043-Electronics - Capacitor, electrolytic cylindrical, radial (both leads on the same side) - by mass | Mass (g) | 1           |

| Subsystem                 | Description                                  | Process (best fit)                                                 | Unit        | Measurement |
|---------------------------|----------------------------------------------|--------------------------------------------------------------------|-------------|-------------|
| Power supply              | Caps, ceramic - 13mm diameter                | 045-Electronics - Capacitor, ceramic (button)                      | Mass (g)    | 2           |
| Power supply              | Caps, ceramic - 13mm diameter                | 045-Electronics - Capacitor, ceramic (button)                      | Mass (g)    | 2           |
| Power supply              | Caps, ceramic - 7mm diameter                 | 045-Electronics - Capacitor, ceramic (button)                      | Mass (g)    | 0           |
| Power supply              | Caps, ceramic - 9mm diameter                 | 045-Electronics - Capacitor, ceramic (button)                      | Mass (g)    | 0           |
| Power supply              | Power transistor, 10mmx17mm, 6X, 11.5g total | 042-Electronics - Transistor, large/power                          | Mass (g)    | 12          |
| Power supply              | Metal heat spreader - light non-magnetic     | 005-Metal - aluminum (solid)                                       | Mass (g)    | 11          |
| Power supply              | AC power plug + small wires                  | 075-Electronics - ports - AC power plug                            | Mass (g)    | 18          |
| Power supply              | Internal power plugs and small wires         | 081-Electronics - connectors - misc. on-board plugs and connectors | Mass (g)    | 14          |
| Power supply              | Screws                                       | 002-Metal - steel (screws)                                         | Mass (g)    | 4           |
| Power supply              | Rubber bits                                  | 012-Plastic - silicone rubber                                      | Mass (g)    | 0           |
| Power supply              | Small IC's and tiny bits                     | 040-Electronics - IC, tiny < 0.1g                                  | Mass (g)    | 2           |
| Subtotal: power supply    |                                              |                                                                    | Mass (g)    | 476         |
|                           |                                              |                                                                    |             | 0           |
| Subtotal: IC's (packaged) |                                              |                                                                    | Mass (g)    | 35          |
| Subtotal: IC's (die)      |                                              |                                                                    | Area (mm^2) | 218         |
|                           |                                              |                                                                    |             |             |
| Total                     |                                              |                                                                    | Mass (g)    | 2972        |

Table S6-IV: Full bill of materials, small desktop

### C. Thin client

This product is a Dell FX-100 thin client (or "zero client"), circa 2010 manufacture, with dimensions 13cm x 22cm x 5cm, and total mass 1.28kg, excluding external packaging, but including a 182g external power supply.

| Category                    | Unit                    | Measurement | GHG (kg CO <sub>2</sub> -eq) | Primary energy (MJ) |
|-----------------------------|-------------------------|-------------|------------------------------|---------------------|
| Power supply (excl. IC's)   | Mass (g)                | 182         | 5.1                          | 96                  |
| Casing                      | Mass (g)                | 860         | 3.7                          | 70                  |
| Circuit boards (excl. IC's) | Mass (g)                | 227         | 12.6                         | 233                 |
| IC's (packages)             | Mass (g)                | 8.4         | 5.6                          | 126.0               |
| IC's (die)                  | Area (mm <sup>2</sup> ) | 126         | 5.4                          | 80                  |
| Battery                     | Mass (g)                |             |                              |                     |
| Display                     | Mass (g)                |             |                              |                     |
| Other                       | Mass (g)                |             |                              |                     |
| Transport                   | Mass (g)                | 1277        | 0.3                          | 5                   |
| Assembly                    | Products                | 1           | 0.9                          | 19                  |
| Total                       | Mass(g)                 | 1277        | 33.6                         | 630                 |

Table S6-V: Summary of bill of materials, thin client

| Subsystem | Description                          | Process (best fit)                                   | Unit     | Measurement |
|-----------|--------------------------------------|------------------------------------------------------|----------|-------------|
| Assembly  | Assembly                             | 098-Assembly - large component or medium product     | Products | 1           |
| Transport | Transport to regional assembly       | 087-Transport - SE Asia to regional assembly (per g) | Mass (g) | 1277        |
| Casing    | Backplate - magnetic metal           | 001-Metal - steel (sheet)                            | Mass (g) | 157         |
| Casing    | Frame - magnetic metal               | 001-Metal - steel (sheet)                            | Mass (g) | 200         |
| Casing    | Backplate - plastic PC+ABS (labeled) | 009-Plastic - ABS + PC blend                         | Mass (g) | 104         |
| Casing    | Metal screws, magnetic               | 002-Metal - steel (screws)                           | Mass (g) | 10          |
| Casing    | Plastic plating - PC+ABS             | 009-Plastic - ABS + PC blend                         | Mass (g) | 111         |

| Subsystem                | Description                                                         | Process (best fit)                                                                                    | Unit            | Measurement |
|--------------------------|---------------------------------------------------------------------|-------------------------------------------------------------------------------------------------------|-----------------|-------------|
| Casing                   | Plastic plating - PC+ABS                                            | 009-Plastic - ABS + PC blend                                                                          | Mass (g)        | 37          |
| Casing                   | Bottom stand - PC+ABS plastic                                       | 009-Plastic - ABS + PC blend                                                                          | Mass (g)        | 69          |
| Casing                   | Bottom stand - metal plate, magnetic                                | 001-Metal - steel (sheet)                                                                             | Mass (g)        | 172         |
| <b>Subtotal (casing)</b> |                                                                     |                                                                                                       | <b>Mass (g)</b> | <b>860</b>  |
| Power supply             | 36W power supply, external AC/DC converter - bare PCB 3x9cm 2 layer | 019-Electronics - PCB (2 layer, bare)                                                                 | Mass (g)        | 6.2         |
| Power supply             | Plastic casing PC+FR plastic                                        | 010-Plastic - PC                                                                                      | Mass (g)        | 27          |
| Power supply             | Plastic piece PC+FR plastic                                         | 010-Plastic - PC                                                                                      | Mass (g)        | 5.8         |
| Power supply             | Power cord                                                          | 082-Electronics - cables - power cords, thick cables and cords                                        | Mass (g)        | 58          |
| Power supply             | Thin metal sheeting, non-magnetic                                   | 003-Metal - aluminum (sheet)                                                                          | Mass (g)        | 7.7         |
| Power supply             | Power plug                                                          | 081-Electronics - connectors - misc. on-board plugs and connectors                                    | Mass (g)        | 7.7         |
| Power supply             | Power transistors - 2.2g, 1.9g, 1.9g                                | 042-Electronics - Transistor, large/power                                                             | Mass (g)        | 6.0         |
| Power supply             | Copper sheeting (heat spreader)                                     | 004-Metal - copper (sheet)                                                                            | Mass (g)        | 8.4         |
| Power supply             | Large coil 3cm diameter 15mm height                                 | 049-Electronics - Inductor, large cylindrical wound                                                   | Mass (g)        | 30          |
| Power supply             | Toroidal coil 16mm diameter                                         | 047-Electronics - Inductor, toroidal                                                                  | Mass (g)        | 6.0         |
| Power supply             | Toroidal coil 11mm diameter                                         | 047-Electronics - Inductor, toroidal                                                                  | Mass (g)        | 1.8         |
| Power supply             | Cap electrolytic 15 diameter 26mm height                            | 043-Electronics - Capacitor, electrolytic cylindrical, radial (both leads on the same side) - by mass | Mass (g)        | 8.7         |
| Power supply             | Cap electrolytic 7x16mm, 2X@1.2g each                               | 043-Electronics - Capacitor, electrolytic cylindrical, radial (both leads on the same side) - by mass | Mass (g)        | 2.4         |
| Power supply             | Cap electrolytic 5x12mm                                             | 043-Electronics - Capacitor, electrolytic cylindrical, radial (both leads on the same side) - by mass | Mass (g)        | 0.3         |
| Power supply             | Cap box 18x7x14mm                                                   | 046-Electronics - Capacitor, polyester film (box)                                                     | Mass (g)        | 2.5         |
| Power supply             | Cap box small                                                       | 046-Electronics - Capacitor, polyester film (box)                                                     | Mass (g)        | 0.3         |

| Subsystem                      | Description                                | Process (best fit)                                                                                    | Unit            | Measurement |
|--------------------------------|--------------------------------------------|-------------------------------------------------------------------------------------------------------|-----------------|-------------|
| <b>Power supply</b>            | Small ceramic caps, 2X @ 0.2g each         | 045-Electronics - Capacitor, ceramic (button)                                                         | Mass (g)        | 0.4         |
| <b>Power supply</b>            | Small diodes 3X @ 0.2g each                | 050-Electronics - Diode, large (power)                                                                | Mass (g)        | 0.6         |
| <b>Power supply</b>            | Small rubbery pieces                       | 012-Plastic - silicone rubber                                                                         | Mass (g)        | 0.4         |
| <b>Power supply</b>            | Small white epoxy blobs                    | 016-Plastic - epoxy                                                                                   | Mass (g)        | 1.0         |
| <b>Subtotal (power supply)</b> |                                            |                                                                                                       | <b>Mass (g)</b> | <b>182</b>  |
| <b>Mainboard</b>               | Main logic board: 8-layer, 19x12.5cm       | 022-Electronics - PCB (8 layer, bare)                                                                 | Mass (g)        | 99          |
| <b>Mainboard</b>               | Toroidal coils, 5@ 2.4 g each average      | 047-Electronics - Inductor, toroidal                                                                  | Mass (g)        | 12          |
| <b>Mainboard</b>               | Caps, electrolytic, 5@ 2.2g each average   | 043-Electronics - Capacitor, electrolytic cylindrical, radial (both leads on the same side) - by mass | Mass (g)        | 11          |
| <b>Mainboard</b>               | LED's                                      | 052-Electronics - LED                                                                                 | Mass (g)        | 1.2         |
| <b>Mainboard</b>               | 2x USB port                                | 073-Electronics - ports - small metal (USB, firewire, ethernet)                                       | Mass (g)        | 5.2         |
| <b>Mainboard</b>               | 2x USB port                                | 073-Electronics - ports - small metal (USB, firewire, ethernet)                                       | Mass (g)        | 5.2         |
| <b>Mainboard</b>               | DVI video port                             | 072-Electronics - ports - video multi-pin                                                             | Mass (g)        | 6.6         |
| <b>Mainboard</b>               | DVI video port                             | 072-Electronics - ports - video multi-pin                                                             | Mass (g)        | 6.6         |
| <b>Mainboard</b>               | Ethernet port                              | 073-Electronics - ports - small metal (USB, firewire, ethernet)                                       | Mass (g)        | 9.3         |
| <b>Mainboard</b>               | Other misc. connectors                     | 081-Electronics - connectors - misc. on-board plugs and connectors                                    | Mass (g)        | 15          |
| <b>Mainboard</b>               |                                            | 027-Electronics - IC, large BGA (mounted, plastic package, 672 pin)                                   | Mass (g)        | 4.7         |
| <b>Mainboard</b>               | SMT flat package RAM-style 102-pin 15x15mm | 037-Electronics - IC, packaged RAM chip                                                               | Mass (g)        | 0.4         |
| <b>Mainboard</b>               | SMT 126-pin 20x14mm                        | 038-Electronics - IC, medium SMT, >= 64 pin                                                           | Mass (g)        | 1.9         |
| <b>Mainboard</b>               | SMT 64-pin 10x10mm                         | 038-Electronics - IC, medium SMT, >= 64 pin                                                           | Mass (g)        | 0.4         |
| <b>Mainboard</b>               | SMT 64-pin 10x10mm                         | 038-Electronics - IC, medium SMT, >= 64 pin                                                           | Mass (g)        | 0.4         |

| Subsystem                                 | Description                        | Process (best fit)                         | Unit        | Measurement |
|-------------------------------------------|------------------------------------|--------------------------------------------|-------------|-------------|
| Mainboard                                 | SMT 48-pin 7x7mm                   | 039-Electronics - IC, medium SMT, < 64 pin | Mass (g)    | 0.2         |
| Mainboard                                 | SMT 16-pin 10x8mm                  | 039-Electronics - IC, medium SMT, < 64 pin | Mass (g)    | 0.4         |
| Mainboard                                 | Silicon die, by area ratio         | 095-Silicon die - 2007 process (65 nm)     | Area (mm^2) | 126         |
| Mainboard                                 | Tiny IC's and little bits          | 040-Electronics - IC, tiny < 0.1g          | Mass (g)    | 6.0         |
| Mainboard                                 | Metal heatsink - grey non-magnetic | 006-Metal - aluminum heatsink              | Mass (g)    | 50          |
| Subtotal: Circuit boards (total)          |                                    |                                            | Mass (g)    | 235         |
| Subtotal: Circuit boards (excluding IC's) |                                    |                                            | Mass (g)    | 227         |
| Subtotal: IC's (packaged)                 |                                    |                                            | Mass (g)    | 8.4         |
| Subtotal: IC's (die)                      |                                    |                                            | Area (mm^2) | 126         |
| Total                                     |                                    |                                            | Mass (g)    | 1277        |

Table S6-VI: Full bill of materials, thin client

## D. LCD Monitor

This product is Samsung Syncmaster 2243 21.5" LCD monitor, circa 2009 manufacture, with dimensions 32cm x 51cm x 5cm (excluding stand), and total mass 5070, excluding external packaging, but including power and video cables.

| Category                    | Unit                    | Measurement | GHG (kg CO <sub>2</sub> -eq) | Primary energy (MJ) |
|-----------------------------|-------------------------|-------------|------------------------------|---------------------|
| Power supply                | Mass (g)                | 173         | 10.1                         | 189.9               |
| Casing                      | Mass (g)                | 2157        | 10.2                         | 203.2               |
| Circuit boards (excl. IC's) | Mass (g)                | 38          | 2.2                          | 41.0                |
| IC's (packages)             | Mass (g)                | 2           | 1.2                          | 23.7                |
| IC's (die)                  | Area (mm <sup>2</sup> ) | 22          | 1.0                          | 15.7                |
| Battery                     | Mass (g)                | 0           | 0.0                          | 0.0                 |
| Display                     | Mass (g)                | 2350        | 138.6                        | 2063.8              |
| Other                       | Mass (g)                | 350         | 1.9                          | 41.3                |
| Transport                   | Mass (g)                | 5070        | 1.3                          | 20.2                |
| Assembly                    | Products                | 1           | 1.2                          | 25.3                |
| <b>Total</b>                | Mass(g)                 | 5070        | 167.8                        | 2624.1              |

Table S6-VII: Summary of bill of materials, LCD monitor

| Subsystem | Description                                           | Process (best fit)                                   | Unit     | Measurement |
|-----------|-------------------------------------------------------|------------------------------------------------------|----------|-------------|
| Assembly  | Assembly                                              | 099-Assembly - large component                       | Products | 1           |
| Transport | Transport to regional assembly                        | 087-Transport - SE Asia to regional assembly (per g) | Mass (g) | 5070        |
| Display   | LCD module 50x29cm (48x27cm viewable, 21.5" diagonal) | 058-Display - LCD module                             | Mass (g) | 2350        |
| Casing    | Stand: ABS plastic pieces                             | 008-Plastic - ABS                                    | Mass (g) | 331         |
| Casing    | Stand: metal pieces (magnetic)                        | 001-Metal - steel (sheet)                            | Mass (g) | 332         |
| Casing    | Stand: metal screws                                   | 002-Metal - steel (screws)                           | Mass (g) | 9           |
| Casing    | Plastic front frame: ABS + PMMA                       | 008-Plastic - ABS                                    | Mass (g) | 130         |
| Casing    | Housing - ABS plastic                                 | 008-Plastic - ABS                                    | Mass (g) | 42          |



| Subsystem                                        | Description                                      | Process (best fit)                                                                                    | Unit            | Measurement |
|--------------------------------------------------|--------------------------------------------------|-------------------------------------------------------------------------------------------------------|-----------------|-------------|
| <b>Casing</b>                                    | Backplate plastic high-impact polystyrene (HIPS) | 009-Plastic - ABS + PC blend                                                                          | Mass (g)        | 600         |
| <b>Casing</b>                                    | Metal frame (magnetic)                           | 001-Metal - steel (sheet)                                                                             | Mass (g)        | 650         |
| <b>Casing</b>                                    | HIPS plastic piece                               | 009-Plastic - ABS + PC blend                                                                          | Mass (g)        | 50          |
| <b>Casing</b>                                    | metal screws                                     | 002-Metal - steel (screws)                                                                            | Mass (g)        | 7.0         |
| <b>Casing</b>                                    | small steel piece                                | 001-Metal - steel (sheet)                                                                             | Mass (g)        | 5.5         |
| <b>Subtotal: Casing</b>                          |                                                  |                                                                                                       | <b>Mass (g)</b> | <b>2157</b> |
| <b>Mainboard</b>                                 | 2-layer PCB, 6.5 x 8.5 cm                        | 019-Electronics - PCB (2 layer, bare)                                                                 | Mass (g)        | 18          |
| <b>Mainboard</b>                                 | VGA port                                         | 072-Electronics - ports - video multi-pin                                                             | Mass (g)        | 6.0         |
| <b>Mainboard</b>                                 | DVI port                                         | 072-Electronics - ports - video multi-pin                                                             | Mass (g)        | 5.5         |
| <b>Mainboard</b>                                 | misc. connectors                                 | 081-Electronics - connectors - misc. on-board plugs and connectors                                    | Mass (g)        | 2.2         |
| <b>Mainboard</b>                                 | 20x14mm Samsung QFP chip 136-pin                 | 034-Electronics - IC, large BGA SMT, no PCB (144 pin)                                                 | Mass (g)        | 1.7         |
| <b>Mainboard</b>                                 | Silicon die, by area ratio                       | 092-Silicon die - 1999 process (180 nm)                                                               | Area (mm^2)     | 22          |
| <b>Mainboard</b>                                 | Small IC's and bits                              | 040-Electronics - IC, tiny < 0.1g                                                                     | Mass (g)        | 2.0         |
| <b>Mainboard</b>                                 | ribbon cable                                     | 083-Electronics - cables - large ribbon cables                                                        | Mass (g)        | 4.7         |
| <b>Subtotal: Circuit boards (total)</b>          |                                                  |                                                                                                       | <b>Mass (g)</b> | <b>40</b>   |
| <b>Subtotal: Circuit boards (excluding IC's)</b> |                                                  |                                                                                                       | <b>Mass (g)</b> | <b>38</b>   |
| <b>Power supply</b>                              | 2-layer PCB 16x13cm                              | 019-Electronics - PCB (2 layer, bare)                                                                 | Mass (g)        | 18          |
| <b>Power supply</b>                              | caps large electrolytic                          | 043-Electronics - Capacitor, electrolytic cylindrical, radial (both leads on the same side) - by mass | Mass (g)        | 24          |
| <b>Power supply</b>                              | coils large cylindrical wound                    | 049-Electronics - Inductor, large cylindrical wound                                                   | Mass (g)        | 77          |
| <b>Power supply</b>                              | caps ceramic                                     | 045-Electronics - Capacitor, ceramic (button)                                                         | Mass (g)        | 6.3         |
| <b>Power supply</b>                              | caps polyester film                              | 046-Electronics - Capacitor, polyester film (box)                                                     | Mass (g)        | 6.8         |
| <b>Power supply</b>                              | diodes large                                     | 050-Electronics - Diode, large (power)                                                                | Mass (g)        | 5.1         |

| Subsystem                        | Description             | Process (best fit)                                                 | Unit               | Measurement |
|----------------------------------|-------------------------|--------------------------------------------------------------------|--------------------|-------------|
| Power supply                     | power MOSFETs           | 042-Electronics - Transistor, large/power                          | Mass (g)           | 4.3         |
| Power supply                     | AC power plug           | 075-Electronics - ports - AC power plug                            | Mass (g)           | 8.3         |
| Power supply                     | metal heatsink aluminum | 006-Metal - aluminum heatsink                                      | Mass (g)           | 18          |
| Power supply                     | connectors              | 081-Electronics - connectors - misc. on-board plugs and connectors | Mass (g)           | 5.6         |
| <b>Subtotal: Power supply</b>    |                         |                                                                    | <b>Mass (g)</b>    | <b>173</b>  |
| Extra parts                      | Power cable             | 082-Electronics - cables - power cords, thick cables and cords     | Mass (g)           | 150         |
| Extra parts                      | VGA cable               | 082-Electronics - cables - power cords, thick cables and cords     | Mass (g)           | 90          |
| Extra parts                      | DVI cable               | 082-Electronics - cables - power cords, thick cables and cords     | Mass (g)           | 110         |
| <b>Subtotal: Other</b>           |                         |                                                                    | <b>Mass (g)</b>    | <b>350</b>  |
| <b>Subtotal: IC's (packages)</b> |                         |                                                                    | <b>Mass (g)</b>    | <b>1.7</b>  |
| <b>Subtotal: IC's (die)</b>      |                         |                                                                    | <b>Area (mm^2)</b> | <b>22</b>   |
| <b>Total</b>                     |                         |                                                                    |                    | <b>5070</b> |

Table S6-VIII: Full bill of materials, LCD monitor

## E. Laptop

This product is an HP 530 laptop, circa 2009 manufacture, with dimensions 35cm x 25cm x 3cm, and total mass 2.77kg, excluding external packaging, but including a 433g external power supply.

| Category                    | Unit                    | Measurement | GHG (kg CO <sub>2</sub> -eq) | Primary energy (MJ) |
|-----------------------------|-------------------------|-------------|------------------------------|---------------------|
| Power supply                | Mass (g)                | 433         | 9.0                          | 172.9               |
| Casing                      | Mass (g)                | 904         | 6.8                          | 134.2               |
| Circuit boards (excl. IC's) | Mass (g)                | 281         | 16.2                         | 322.7               |
| IC's (packages)             | Mass (g)                | 21          | 15.5                         | 306.2               |
| IC's (die)                  | Area (mm <sup>2</sup> ) | 483         | 20.8                         | 307.2               |
| Battery                     | Mass (g)                | 244         | 1.3                          | 24.6                |
| Display                     | Mass (g)                | 553         | 31.9                         | 475.4               |
| Other                       | Mass (g)                | 334         | 4.9                          | 87.8                |
| Transport                   | Mass (g)                | 2770        | 0.7                          | 11.1                |
| Assembly                    | Products                | 1           | 0.9                          | 19.0                |
| Total                       | Mass(g)                 | 2770        | 107.8                        | 1861.1              |

Table S6-IX: Summary of bill of materials, laptop

| Subsystem | Description                                     | Process (best fit)                                   | Unit     | Measurement |
|-----------|-------------------------------------------------|------------------------------------------------------|----------|-------------|
| Assembly  | Assembly                                        | 098-Assembly - large component or medium product     | Products | 1           |
| Transport | Transport to regional assembly                  | 087-Transport - SE Asia to regional assembly (per g) | Mass (g) | 2770        |
| Battery   | 14.4V, 32WH Li-ion battery (encased in plastic) | 054-Battery - Li-Ion 32 Whr (Laptop)                 | Mass (g) | 244         |
| Casing    | RAM cover, plastic, PC+ABS                      | 009-Plastic - ABS + PC blend                         | Mass (g) | 28          |
| Casing    | Metal screws                                    | 002-Metal - steel (screws)                           | Mass (g) | 4.2         |
| Casing    | HD cover, plastic PC+ABS                        | 009-Plastic - ABS + PC blend                         | Mass (g) | 28          |
| Casing    | Backplate, PC/ABS plastic 35x26cm               | 009-Plastic - ABS + PC blend                         | Mass (g) | 231         |
| Casing    | Frontplate, PC/ABS plastic,                     | 009-Plastic - ABS + PC blend                         | Mass (g) | 38          |

|                         |                                                      |                                                                    |                 |            |
|-------------------------|------------------------------------------------------|--------------------------------------------------------------------|-----------------|------------|
|                         | 34x5cm                                               |                                                                    |                 |            |
| <b>Casing</b>           | Frontplate, PC/ABS plastic                           | 009-Plastic - ABS + PC blend                                       | Mass (g)        | 215        |
| <b>Casing</b>           | ABS housing for speakers                             | 009-Plastic - ABS + PC blend                                       | Mass (g)        | 3.2        |
| <b>Casing</b>           | Brackets main hinge - "Mg alloy"<br>- 2x6.3g         | 001-Metal - steel (sheet)                                          | Mass (g)        | 13         |
| <b>Casing</b>           | Front frame - PC-ABS plastic                         | 009-Plastic - ABS + PC blend                                       | Mass (g)        | 40         |
| <b>Casing</b>           | Metal screws                                         | 002-Metal - steel (screws)                                         | Mass (g)        | 4.2        |
| <b>Casing</b>           | Backplate PC-ABS plastic                             | 009-Plastic - ABS + PC blend                                       | Mass (g)        | 240        |
| <b>Casing</b>           | Display frame - steel clamps                         | 001-Metal - steel (sheet)                                          | Mass (g)        | 60         |
| <b>Subtotal: Casing</b> |                                                      |                                                                    | <b>Mass (g)</b> | <b>904</b> |
| <b>Daughtercards</b>    | Small daughtercard: 13x77mm 6 layer, negligible IC's | 021-Electronics - PCB (6 layer, bare)                              | Mass (g)        | 2.7        |
| <b>Daughtercards</b>    | Small daughtercard: 25x35mm, 4 layer                 | 020-Electronics - PCB (4 layer, bare)                              | Mass (g)        | 2.5        |
| <b>Daughtercards</b>    | On-board connectors                                  | 081-Electronics - connectors - misc. on-board plugs and connectors | Mass (g)        | 3.0        |
| <b>Mainboard</b>        | Main logic board 15x19+11x6cm, 6 layer               | 021-Electronics - PCB (6 layer, bare)                              | Mass (g)        | 102        |
| <b>Mainboard</b>        | Plastic spill guard                                  | 011-Plastic - LPDE (plastic wrap)                                  | Mass (g)        | 5.8        |
| <b>Mainboard</b>        | 3V CR2032 Li battery                                 | 056-Battery - CR2032 3V Li-Ion (CMOS)                              | Mass (g)        | 2.9        |
| <b>Mainboard</b>        | Heatsink - copper bar (heat conductor)               | 007-Metal - copper heatsink                                        | Mass (g)        | 17         |
| <b>Mainboard</b>        | Heatsink - fins (non-magnetic)                       | 006-Metal - aluminum heatsink                                      | Mass (g)        | 4.0        |
| <b>Mainboard</b>        | Heatsink - heat spreader (non-magnetic)              | 006-Metal - aluminum heatsink                                      | Mass (g)        | 16         |
| <b>Mainboard</b>        | PCMCIA card port                                     | 079-Electronics - connectors - PCI-type slot                       | Mass (g)        | 17         |
| <b>Mainboard</b>        | RAM slots, 2x5g each, 6.5cm                          | 077-Electronics - connectors - laptop-size RAM slot                | Mass (g)        | 10         |
| <b>Mainboard</b>        | Ethernet port                                        | 073-Electronics - ports - small metal (USB, firewire, ethernet)    | Mass (g)        | 2.7        |
| <b>Mainboard</b>        | Voice data port                                      | 073-Electronics - ports - small metal (USB, firewire,              | Mass (g)        | 1.8        |

|                  |                                                                       |                                                                                                       |             |     |
|------------------|-----------------------------------------------------------------------|-------------------------------------------------------------------------------------------------------|-------------|-----|
|                  |                                                                       | ethernet)                                                                                             |             |     |
| <b>Mainboard</b> | USB port, 2x2g each                                                   | 073-Electronics - ports - small metal (USB, firewire, ethernet)                                       | Mass (g)    | 4.0 |
| <b>Mainboard</b> | VGA port                                                              | 072-Electronics - ports - video multi-pin                                                             | Mass (g)    | 3.8 |
| <b>Mainboard</b> | Stereo mini port, 2x1g each                                           | 073-Electronics - ports - small metal (USB, firewire, ethernet)                                       | Mass (g)    | 1.9 |
| <b>Mainboard</b> | Power port                                                            | 073-Electronics - ports - small metal (USB, firewire, ethernet)                                       | Mass (g)    | 1.5 |
| <b>Mainboard</b> | Misc. connectors                                                      | 081-Electronics - connectors - misc. on-board plugs and connectors                                    | Mass (g)    | 8.1 |
| <b>Mainboard</b> | CPU - large metal heat spreader, non-magnetic                         | 006-Metal - aluminum heatsink                                                                         | Mass (g)    | 8.8 |
| <b>Mainboard</b> | CPU - plastic socket                                                  | 080-Electronics - connectors - CPU socket                                                             | Mass (g)    | 5.7 |
| <b>Mainboard</b> | CPU - Intel 1.83/2M/667 398-pin bare die; 35x35mm, 8x11mm die         | 033-Electronics - IC, large BGA (mounted bare die, 672 pin)                                           | Mass (g)    | 6.2 |
| <b>Mainboard</b> | CPU unmarked 1469-pin bare die 37x37mm PBC 11x11mm die                | 033-Electronics - IC, large BGA (mounted bare die, 672 pin)                                           | Mass (g)    | 4.7 |
| <b>Mainboard</b> | Silicon die, exposed                                                  | 095-Silicon die - 2007 process (65 nm)                                                                | Area (mm^2) | 209 |
| <b>Mainboard</b> | CPU Intel NH82820 652-pin mounted package 31x31cm PCB 25x25mm package | 027-Electronics - IC, large BGA (mounted, plastic package, 672 pin)                                   | Mass (g)    | 3.5 |
| <b>Mainboard</b> | 128-pin SMT 21x21mm                                                   | 038-Electronics - IC, medium SMT, >= 64 pin                                                           | Mass (g)    | 1.4 |
| <b>Mainboard</b> | 128-pin SMT 15x15mm                                                   | 038-Electronics - IC, medium SMT, >= 64 pin                                                           | Mass (g)    | 0.5 |
| <b>Mainboard</b> | 72-pin DIP 17x7mm                                                     | 038-Electronics - IC, medium SMT, >= 64 pin                                                           | Mass (g)    | 0.3 |
| <b>Mainboard</b> | 48-pin DIP 16x7mm                                                     | 039-Electronics - IC, medium SMT, < 64 pin                                                            | Mass (g)    | 0.7 |
| <b>Mainboard</b> | Silicon die, by area ratio                                            | 095-Silicon die - 2007 process (65 nm)                                                                | Area (mm^2) | 119 |
| <b>Mainboard</b> | Small IC's                                                            | 040-Electronics - IC, tiny < 0.1g                                                                     | Mass (g)    | 3.3 |
| <b>Mainboard</b> | Small inductors                                                       | 048-Electronics - Inductor, chip (small box)                                                          | Mass (g)    | 11  |
| <b>Mainboard</b> | Small caps                                                            | 043-Electronics - Capacitor, electrolytic cylindrical, radial (both leads on the same side) - by mass | Mass (g)    | 2.5 |
| <b>Mainboard</b> | Misc. connectors                                                      | 081-Electronics - connectors - misc. on-board plugs                                                   | Mass (g)    | 6.0 |

|                                                  |                                                      |                                                                |                 |            |
|--------------------------------------------------|------------------------------------------------------|----------------------------------------------------------------|-----------------|------------|
|                                                  |                                                      | and connectors                                                 |                 |            |
| <b>Mainboard</b>                                 | Misc. tiny bits                                      | 040-Electronics - IC, tiny < 0.1g                              | Mass (g)        | 7.2        |
| <b>Mainboard</b>                                 | Small CPU fan, 5x6cm                                 | 065-Electronics - components - small CPU fan                   | Mass (g)        | 0.0        |
| <b>Daughterboards</b>                            | Wireless antenna - wires                             | 084-Electronics - cables - small cables and wires              | Mass (g)        | 6.6        |
| <b>Daughterboards</b>                            | Wireless antenna - metal, non-magnetic               | 005-Metal - aluminum (solid)                                   | Mass (g)        | 4.3        |
| <b>Daughterboards</b>                            | Small PWB, 1x10cm                                    | 019-Electronics - PCB (2 layer, bare)                          | Mass (g)        | 8.0        |
| <b>RAM</b>                                       | RAM PCB, 2x, each 30x67mm 6-layer                    | 021-Electronics - PCB (6 layer, bare)                          | Mass (g)        | 5.7        |
| <b>RAM</b>                                       | 16X RAM IC's, each 84-pin 0.2g, 12x10mm (64MB)       | 037-Electronics - IC, packaged RAM chip                        | Mass (g)        | 3.2        |
| <b>RAM</b>                                       | Silicon die, by area ratio                           | 095-Silicon die - 2007 process (65 nm)                         | Area (mm^2)     | 150        |
| <b>Daughterboards</b>                            | Wireless board - PCB 5x3cm, 4 layer                  | 020-Electronics - PCB (4 layer, bare)                          | Mass (g)        | 3.6        |
| <b>Daughterboards</b>                            | Wireless board - metal shield, magnetic              | 001-Metal - steel (sheet)                                      | Mass (g)        | 1.2        |
| <b>Daughterboards</b>                            | Wireless board - large IC 225-pin packaged BGA SMT   | 035-Electronics - IC, large BGA SMT, no PCB (256 pin)          | Mass (g)        | 0.3        |
| <b>Daughterboards</b>                            | Silicon die, by mass ratio                           | 095-Silicon die - 2007 process (65 nm)                         | Area (mm^2)     | 5.5        |
| <b>Daughterboards</b>                            | Wireless board small IC's                            | 040-Electronics - IC, tiny < 0.1g                              | Mass (g)        | 0.4        |
| <b>Subtotal: Circuit boards (total)</b>          |                                                      |                                                                | <b>Mass (g)</b> | <b>302</b> |
| <b>Subtotal: Circuit boards (excluding IC's)</b> |                                                      |                                                                | <b>Mass (g)</b> | <b>281</b> |
|                                                  |                                                      |                                                                |                 |            |
| <b>Display</b>                                   | LCD module 36x21.5cm                                 | 058-Display - LCD module                                       | Mass (g)        | 540        |
| <b>Display</b>                                   | Display, reflective backplate, flexible plastic tape | 011-Plastic - LPDE (plastic wrap)                              | Mass (g)        | 13         |
| <b>Subtotal: Display</b>                         |                                                      |                                                                | <b>Mass (g)</b> | <b>553</b> |
| <b>Power supply</b>                              | Power cable                                          | 082-Electronics - cables - power cords, thick cables and cords | Mass (g)        | 160        |
| <b>Power supply</b>                              | Power cord                                           | 082-Electronics - cables - power cords, thick cables           | Mass (g)        | 64         |

|                               |                                   |                                                                                                       |          |            |
|-------------------------------|-----------------------------------|-------------------------------------------------------------------------------------------------------|----------|------------|
|                               |                                   | and cords                                                                                             |          |            |
| <b>Power supply</b>           | Plastic casing                    | 008-Plastic - ABS                                                                                     | Mass (g) | 58         |
| <b>Power supply</b>           | Bare PCB 2-layer 5x11cm           | 019-Electronics - PCB (2 layer, bare)                                                                 | Mass (g) | 17         |
| <b>Power supply</b>           | Cylindrical electrolytic caps     | 043-Electronics - Capacitor, electrolytic cylindrical, radial (both leads on the same side) - by mass | Mass (g) | 12         |
| <b>Power supply</b>           | Ceramic caps                      | 045-Electronics - Capacitor, ceramic (button)                                                         | Mass (g) | 3          |
| <b>Power supply</b>           | Coils - large cylindrical wound   | 049-Electronics - Inductor, large cylindrical wound                                                   | Mass (g) | 53         |
| <b>Power supply</b>           | Coils - toroidal                  | 047-Electronics - Inductor, toroidal                                                                  | Mass (g) | 6          |
| <b>Power supply</b>           | Capacitor - box (film)            | 046-Electronics - Capacitor, polyester film (box)                                                     | Mass (g) | 6          |
| <b>Power supply</b>           | Power plug                        | 075-Electronics - ports - AC power plug                                                               | Mass (g) | 11         |
| <b>Power supply</b>           | Metal frame, aluminum             | 003-Metal - aluminum (sheet)                                                                          | Mass (g) | 31         |
| <b>Power supply</b>           | Power transistors                 | 042-Electronics - Transistor, large/power                                                             | Mass (g) | 5          |
| <b>Power supply</b>           | LED                               | 052-Electronics - LED                                                                                 | Mass (g) | 0          |
| <b>Power supply</b>           | Power resistors                   | 051-Electronics - Resistor, large (power)                                                             | Mass (g) | 1          |
| <b>Power supply</b>           | Fuse                              | 050-Electronics - Diode, large (power)                                                                | Mass (g) | 1          |
| <b>Power supply</b>           | Rubbery coatings                  | 012-Plastic - silicone rubber                                                                         | Mass (g) | 2          |
| <b>Power supply</b>           | Small transistors                 | 041-Electronics - Transistor, small                                                                   | Mass (g) | 0          |
| <b>Power supply</b>           | Small diodes                      | 050-Electronics - Diode, large (power)                                                                | Mass (g) | 0          |
| <b>Power supply</b>           | Small IC's                        | 040-Electronics - IC, tiny < 0.1g                                                                     | Mass (g) | 0          |
| <b>Power supply</b>           | Small metal brackets, magnetic    | 001-Metal - steel (sheet)                                                                             | Mass (g) | 1          |
| <b>Power supply</b>           | Small plastic bits                | 008-Plastic - ABS                                                                                     | Mass (g) | 1          |
| <b>Subtotal: Power supply</b> |                                   |                                                                                                       |          | <b>433</b> |
| <b>Interior parts</b>         | DVD-RW drive, 180g, 13x12.1x1.3cm | 061-Electronics - components - DVD drive                                                              | Mass (g) | 180        |
| <b>Keyboard</b>               | Keys, PC/ABS plastic              | 009-Plastic - ABS + PC blend                                                                          | Mass (g) | 25         |
| <b>Keyboard</b>               | Plastic bumpers (white plastic)   | 009-Plastic - ABS + PC blend                                                                          | Mass (g) | 10         |
| <b>Keyboard</b>               | Metal brackets -steel             | 001-Metal - steel (sheet)                                                                             | Mass (g) | 1          |
| <b>Keyboard</b>               | Rubber/silicone bumpers           | 012-Plastic - silicone rubber                                                                         | Mass (g) | 3          |

|                                  |                                       |                                                     |                    |             |
|----------------------------------|---------------------------------------|-----------------------------------------------------|--------------------|-------------|
| <b>Keyboard</b>                  | Papery film layer                     | 018-Paper                                           | Mass (g)           | 4           |
| <b>Keyboard</b>                  | Flexible circuit board - 30.5x10.5cm  | 013-Plastic - polystyrene film (flex circuit board) | Mass (g)           | 8           |
| <b>Keyboard</b>                  | Metal backplate - non-magnetic        | 005-Metal - aluminum (solid)                        | Mass (g)           | 45          |
| <b>Interior parts</b>            | Stickers on wireless chip             | 018-Paper                                           | Mass (g)           | 0           |
| <b>Interior parts</b>            | HD carriage, metal, magnetic          | 001-Metal - steel (sheet)                           | Mass (g)           | 34          |
| <b>Keyboard</b>                  | Trackpad - Metal plate, non-magnetic  | 003-Metal - aluminum (sheet)                        | Mass (g)           | 9           |
| <b>Keyboard</b>                  | Trackpad - Sticker                    | 018-Paper                                           | Mass (g)           | 1           |
| <b>Keyboard</b>                  | Trackpad - Small PCB - 7.5g , 7 x 5cm | 019-Electronics - PCB (2 layer, bare)               | Mass (g)           | 8           |
| <b>Interior parts</b>            | Speakers                              | 071-Electronics - components - speaker              | Mass (g)           | 3           |
| <b>Interior parts</b>            | PCMCIA card tray - PC/ABS plastic     | 009-Plastic - ABS + PC blend                        | Mass (g)           | 6           |
| <b>Subtotal: Other</b>           |                                       |                                                     | <b>Mass (g)</b>    | <b>334</b>  |
|                                  |                                       |                                                     |                    |             |
| <b>Subtotal: IC's (packaged)</b> |                                       |                                                     | <b>Mass (g)</b>    | <b>21</b>   |
| <b>Subtotal: IC's (die)</b>      |                                       |                                                     | <b>Area (mm^2)</b> | <b>483</b>  |
|                                  |                                       |                                                     |                    |             |
| <b>Total</b>                     |                                       |                                                     | <b>Mass (g)</b>    | <b>2770</b> |

Table S6-X: Full bill of materials, laptop



## F. Netbook

This product is an HP Mini 110-1030CA netbook-style laptop, circa 2009 manufacture, with dimensions 26cm x 17cm x 3cm, and total mass 1.34kg, excluding external packaging, but including a 297g external power supply.

| Category                    | Unit                    | Measurement | GHG (kg CO <sub>2</sub> -eq) | Primary energy (MJ) |
|-----------------------------|-------------------------|-------------|------------------------------|---------------------|
| Power supply                | Mass (g)                | 297         | 8                            | 151                 |
| Casing                      | Mass (g)                | 265         | 2                            | 39                  |
| Circuit boards (excl. IC's) | Mass (g)                | 127         | 9                            | 161                 |
| IC's (packages)             | Mass (g)                | 17          | 12                           | 245                 |
| IC's (die)                  | Area (mm <sup>2</sup> ) | 463         | 20                           | 294                 |
| Battery                     | Mass (g)                | 178         | 0.9                          | 18                  |
| Display                     | Mass (g)                | 204         | 7                            | 101                 |
| Other                       | Mass (g)                | 250         | 3                            | 54                  |
| Transport                   | Mass (g)                | 1337        | 0.3                          | 5                   |
| Assembly                    | Products                | 1           | 1                            | 19                  |
| <b>Total</b>                | Mass(g)                 | 1337        | 62                           | 1088                |

Table S6-XI: Summary of bill of materials, netbook

| Subsystem | Description                          | Process (best fit)                                   | Unit     | Measurement |
|-----------|--------------------------------------|------------------------------------------------------|----------|-------------|
| Assembly  | Assembly                             | 098-Assembly - large component or medium product     | Products | 1           |
| Transport | Transport to regional assembly       | 087-Transport - SE Asia to regional assembly (per g) | Mass (g) | 1337        |
| Battery   | Battery - Li-Ion Cell 10.8V, 2420mAh | 054-Battery - Li-Ion 32 Whr (Laptop)                 | Mass (g) | 178         |
| Display   | Display - thin metal layer           | 003-Metal - aluminum (sheet)                         | Mass (g) | 5.3         |
| Display   | LCD module, 22.5x12.7cm              | 058-Display - LCD module                             | Mass (g) | 107         |

| Subsystem            | Description                                  | Process (best fit)                                                 | Unit            | Measurement |
|----------------------|----------------------------------------------|--------------------------------------------------------------------|-----------------|-------------|
| <b>Display</b>       | Glass plate, 23x13.8cm                       | 059-Display - Glass                                                | Mass (g)        | 92          |
|                      | Subtotal: Display                            |                                                                    | Mass (g)        | 204         |
| <b>Casing</b>        | Backplate - PC+ABS plastic, 25.5X15cm        | 009-Plastic - ABS + PC blend                                       | Mass (g)        | 120         |
| <b>Casing</b>        | Display plastic frame PC+ABS                 | 009-Plastic - ABS + PC blend                                       | Mass (g)        | 15          |
| <b>Casing</b>        | Display plastic frontplate PC+ABS            | 009-Plastic - ABS + PC blend                                       | Mass (g)        | 105         |
| <b>Casing</b>        | Metal hinge brackets, magnetic, 2x12.5g each | 001-Metal - steel (sheet)                                          | Mass (g)        | 25          |
|                      | <b>Subtotal: Casing</b>                      |                                                                    | <b>Mass (g)</b> | <b>265</b>  |
| <b>Daughtercards</b> | Small daughtercard - 5.5x2cm, 4 layer        | 019-Electronics - PCB (2 layer, bare)                              | Mass (g)        | 3.3         |
| <b>Daughtercards</b> | USB port 1x                                  | 073-Electronics - ports - small metal (USB, firewire, ethernet)    | Mass (g)        | 1.4         |
| <b>Daughtercards</b> | Stereo mini port                             | 073-Electronics - ports - small metal (USB, firewire, ethernet)    | Mass (g)        | 1.6         |
| <b>Daughtercards</b> | Ribbon connector                             | 081-Electronics - connectors - misc. on-board plugs and connectors | Mass (g)        | 0.5         |
| <b>Daughtercards</b> | Small IC devices                             | 040-Electronics - IC, tiny < 0.1g                                  | Mass (g)        | 0.2         |
| <b>Daughtercards</b> | Small daughtercard - 2.5x3.5cm+1x5cm         | 020-Electronics - PCB (4 layer, bare)                              | Mass (g)        | 5.6         |
| <b>Daughtercards</b> | Small power adapter plug                     | 073-Electronics - ports - small metal (USB, firewire, ethernet)    | Mass (g)        | 1.5         |
| <b>Daughtercards</b> | Small wire                                   | 084-Electronics - cables - small cables and wires                  | Mass (g)        | 0.9         |
| <b>Daughtercards</b> | Small ribbon connector                       | 084-Electronics - cables - small cables and wires                  | Mass (g)        | 0.9         |
| <b>Daughtercards</b> | Small SMT IC's                               | 040-Electronics - IC, tiny < 0.1g                                  | Mass (g)        | 1.5         |
| <b>Daughtercards</b> | Small inductor                               | 048-Electronics - Inductor, chip (small box)                       | Mass (g)        | 1.5         |
| <b>RAM</b>           | RAM stick PCB 6.7x3cm (laptop RAM), 8 layer  | 022-Electronics - PCB (8 layer, bare)                              | Mass (g)        | 6.3         |
| <b>RAM</b>           | 8X RAM chips, 10x14mm 108 pin                | 037-Electronics - IC, packaged RAM chip                            | Mass (g)        | 1.6         |

| Subsystem             | Description                                               | Process (best fit)                                                  | Unit        | Measurement |
|-----------------------|-----------------------------------------------------------|---------------------------------------------------------------------|-------------|-------------|
|                       | 0.2g each                                                 |                                                                     |             |             |
| <b>RAM</b>            | Silicon die, by area ratio                                | 095-Silicon die - 2007 process (65 nm)                              | Area (mm^2) | 87          |
| <b>Mainboard</b>      | Battery - CR 2016 Li 3V                                   | 056-Battery - CR2032 3V Li-Ion (CMOS)                               | Mass (g)    | 1.8         |
| <b>Mainboard</b>      | Intel CPU 652-pin packaged/PCB BGA 30x30mm                | 027-Electronics - IC, large BGA (mounted, plastic package, 672 pin) | Mass (g)    | 4.0         |
| <b>Mainboard</b>      | Silicon die, by area ratio                                | 095-Silicon die - 2007 process (65 nm)                              | Area (mm^2) | 70          |
| <b>Mainboard</b>      | Intel 1.60Ghz 227pin bare die/PCB; 24x24mm PCB 7x7mm die. | 032-Electronics - IC, large BGA (mounted bare die, 256 pin)         | Mass (g)    | 3.0         |
| <b>Mainboard</b>      | Bare die 1001-pin 26x26mm package 11x11mm die             | 033-Electronics - IC, large BGA (mounted bare die, 672 pin)         | Mass (g)    | 1.2         |
| <b>Mainboard</b>      | Silicon die, exposed                                      | 095-Silicon die - 2007 process (65 nm)                              | Area (mm^2) | 170         |
| <b>Mainboard</b>      | 108-pin SMT 13x13mm                                       | 038-Electronics - IC, medium SMT, >= 64 pin                         | Mass (g)    | 0.6         |
| <b>Mainboard</b>      | Silicon die, by area ratio                                | 095-Silicon die - 2007 process (65 nm)                              | Area (mm^2) | 13          |
| <b>Mainboard</b>      | Mid-size SMT IC's                                         | 039-Electronics - IC, medium SMT, < 64 pin                          | Mass (g)    | 4.8         |
| <b>Mainboard</b>      | Silicon die, by mass ratio                                | 095-Silicon die - 2007 process (65 nm)                              | Area (mm^2) | 88          |
| <b>Mainboard</b>      | Small inductors                                           | 048-Electronics - Inductor, chip (small box)                        | Mass (g)    | 3.8         |
| <b>Mainboard</b>      | Small on-board batteries, 2X 1.2g each                    | 057-Battery - small on-board                                        | Mass (g)    | 2.4         |
| <b>Mainboard</b>      | Ethernet port                                             | 073-Electronics - ports - small metal (USB, firewire, ethernet)     | Mass (g)    | 2.8         |
| <b>Mainboard</b>      | 2X USB port 1.8g each                                     | 073-Electronics - ports - small metal (USB, firewire, ethernet)     | Mass (g)    | 3.6         |
| <b>Mainboard</b>      | VGA port                                                  | 072-Electronics - ports - video multi-pin                           | Mass (g)    | 3.0         |
| <b>Mainboard</b>      | Misc. on-board connectors and plugs                       | 081-Electronics - connectors - misc. on-board plugs and connectors  | Mass (g)    | 12          |
| <b>Mainboard</b>      | Main logic board - 23.5*6.6 + 4.3x5cm, 8 layer            | 022-Electronics - PCB (8 layer, bare)                               | Mass (g)    | 59          |
| <b>Daughterboards</b> | Small PCB for WLAN - 3x2.3cm                              | 019-Electronics - PCB (2 layer, bare)                               | Mass (g)    | 2.3         |

| Subsystem                                        | Description                                 | Process (best fit)                                                                                    | Unit            | Measurement |
|--------------------------------------------------|---------------------------------------------|-------------------------------------------------------------------------------------------------------|-----------------|-------------|
| <b>Daughtercards</b>                             | Small BGA Broadcom 120-pin 10x10mm          | 034-Electronics - IC, large BGA SMT, no PCB (144 pin)                                                 | Mass (g)        | 0.2         |
| <b>Daughtercards</b>                             | Silicon die, by area ratio                  | 095-Silicon die - 2007 process (65 nm)                                                                | Area (mm^2)     | 7.8         |
| <b>Daughtercards</b>                             | Small RF shield magnetic                    | 001-Metal - steel (sheet)                                                                             | Mass (g)        | 1.0         |
| <b>Daughtercards</b>                             | Display controller PCB 21x3.5cm             | 019-Electronics - PCB (2 layer, bare)                                                                 | Mass (g)        | 11          |
| <b>Daughtercards</b>                             | Small SMT IC's                              | 039-Electronics - IC, medium SMT, < 64 pin                                                            | Mass (g)        | 1.4         |
| <b>Daughtercards</b>                             | Silicon die, by mass ratio                  | 095-Silicon die - 2007 process (65 nm)                                                                | Area (mm^2)     | 26          |
| <b>Subtotal: Circuit boards (total)</b>          |                                             |                                                                                                       | <b>Mass (g)</b> | <b>144</b>  |
| <b>Subtotal: Circuit boards (excluding IC's)</b> |                                             |                                                                                                       | <b>Mass (g)</b> | <b>127</b>  |
| <b>Power supply</b>                              | 42W external power supply (AC/DC converter) |                                                                                                       |                 |             |
| <b>Power supply</b>                              | Power cord (AC side)                        | 082-Electronics - cables - power cords, thick cables and cords                                        | Mass (g)        | 88          |
| <b>Power supply</b>                              | Power cord (DC side)                        | 082-Electronics - cables - power cords, thick cables and cords                                        | Mass (g)        | 51          |
| <b>Power supply</b>                              | 2-layer PCB 9.5x5.5cm                       | 019-Electronics - PCB (2 layer, bare)                                                                 | Mass (g)        | 20          |
| <b>Power supply</b>                              | Plastic casing                              | 008-Plastic - ABS                                                                                     | Mass (g)        | 37          |
| <b>Power supply</b>                              | Metal frame (aluminum)                      | 005-Metal - aluminum (solid)                                                                          | Mass (g)        | 13          |
| <b>Power supply</b>                              | Electrolytic caps                           | 043-Electronics - Capacitor, electrolytic cylindrical, radial (both leads on the same side) - by mass | Mass (g)        | 14          |
| <b>Power supply</b>                              | Ceramic caps                                | 045-Electronics - Capacitor, ceramic (button)                                                         | Mass (g)        | 3           |
| <b>Power supply</b>                              | Coil large cylindrical                      | 049-Electronics - Inductor, large cylindrical wound                                                   | Mass (g)        | 32          |
| <b>Power supply</b>                              | Coil toroidal                               | 047-Electronics - Inductor, toroidal                                                                  | Mass (g)        | 6           |
| <b>Power supply</b>                              | Power transistors                           | 042-Electronics - Transistor, large/power                                                             | Mass (g)        | 10          |
| <b>Power supply</b>                              | Resistors                                   | 051-Electronics - Resistor, large (power)                                                             | Mass (g)        | 1           |
| <b>Power supply</b>                              | Small diodes                                | 050-Electronics - Diode, large (power)                                                                | Mass (g)        | 0           |

| Subsystem                     | Description                             | Process (best fit)                                             | Unit            | Measurement |
|-------------------------------|-----------------------------------------|----------------------------------------------------------------|-----------------|-------------|
| Power supply                  | 20mm fuse                               | 050-Electronics - Diode, large (power)                         | Mass (g)        | 2           |
| Power supply                  | Metal screws                            | 002-Metal - steel (screws)                                     | Mass (g)        | 1           |
| Power supply                  | Small copper piece                      | 004-Metal - copper (sheet)                                     | Mass (g)        | 2           |
| Power supply                  | Small aluminum pieces                   | 005-Metal - aluminum (solid)                                   | Mass (g)        | 3           |
| Power supply                  | AC power plug                           | 075-Electronics - ports - AC power plug                        | Mass (g)        | 4           |
| Power supply                  | Clear rubbery plastic                   | 012-Plastic - silicone rubber                                  | Mass (g)        | 7           |
| Power supply                  | Stiff clear plastic pieces              | 010-Plastic - PC                                               | Mass (g)        | 3           |
| <b>Subtotal: Power supply</b> |                                         |                                                                | <b>Mass (g)</b> | <b>297</b>  |
| Keyboard                      | Plastic plating - PC-ABS                | 009-Plastic - ABS + PC blend                                   | Mass (g)        | 60          |
| Keyboard                      | Trackpad - Plastic plating PC-ABS       | 009-Plastic - ABS + PC blend                                   | Mass (g)        | 4           |
| Keyboard                      | Trackpad - Small PCB 6x3.4cm            | 019-Electronics - PCB (2 layer, bare)                          | Mass (g)        | 5           |
| Keyboard                      | Trackpad - Tiny SMT components          | 040-Electronics - IC, tiny < 0.1g                              | Mass (g)        | 0           |
| Keyboard                      | Plastic keys - PC-ABS                   | 009-Plastic - ABS + PC blend                                   | Mass (g)        | 20          |
| Keyboard                      | Plastic bumpers - unknown white plastic | 009-Plastic - ABS + PC blend                                   | Mass (g)        | 10          |
| Keyboard                      | Rubber bumpers                          | 012-Plastic - silicone rubber                                  | Mass (g)        | 2           |
| Keyboard                      | Flexible printed circuit , 25x10cm      | 013-Plastic - polystyrene film (flex circuit board)            | Mass (g)        | 8           |
| Interior parts                | Metal plating, non-magnetic             | 003-Metal - aluminum (sheet)                                   | Mass (g)        | 70          |
| Interior parts                | Hard drive cover - non-magnetic metal   | 003-Metal - aluminum (sheet)                                   | Mass (g)        | 14          |
| Interior parts                | Small flat ribbon cable 9cm             | 083-Electronics - cables - large ribbon cables                 | Mass (g)        | 0           |
| Interior parts                | Copper heat spreader (flat)             | 004-Metal - copper (sheet)                                     | Mass (g)        | 15          |
| Interior parts                | Small CPU fan 4x4cm                     | 065-Electronics - components - small CPU fan                   | Mass (g)        | 13          |
| Interior parts                | Speakers                                | 049-Electronics - Inductor, large cylindrical wound            | Mass (g)        | 11          |
| Interior parts                | Display cable                           | 082-Electronics - cables - power cords, thick cables and cords | Mass (g)        | 6           |

| Subsystem                 | Description                        | Process (best fit)                                             | Unit        | Measurement |
|---------------------------|------------------------------------|----------------------------------------------------------------|-------------|-------------|
| Interior parts            | Long thin wire for wireless (50cm) | 084-Electronics - cables - small cables and wires              | Mass (g)    | 3           |
| Interior parts            | Display cable                      | 082-Electronics - cables - power cords, thick cables and cords | Mass (g)    | 6           |
| Interior parts            | Long thin wire for wireless (50cm) | 084-Electronics - cables - small cables and wires              | Mass (g)    | 3           |
| Subtotal: Other           |                                    |                                                                | Mass (g)    | 250         |
| Subtotal: IC's (packaged) |                                    |                                                                | Mass (g)    | 17          |
| Subtotal: IC's (die)      |                                    |                                                                | Area (mm^2) | 463         |
| Total                     |                                    |                                                                | Mass (g)    | 1337        |

Table S6-XII: Full bill of materials, netbook

## G. Apple iPad

This product is an Apple iPad 8Gb WIFI 1st gen, circa 2009 manufacture, with dimensions 24cm x 19cm x 1cm, and total mass 777g, excluding external packaging, but including an 89g external power supply.

| Category                    | Unit                    | Measurement | GHG (kg CO <sub>2</sub> -eq) | Primary energy (MJ) |
|-----------------------------|-------------------------|-------------|------------------------------|---------------------|
| Power supply                | Mass (g)                | 89          | 2.3                          | 42.2                |
| Casing                      | Mass (g)                | 151         | 1.3                          | 21.8                |
| Circuit boards (excl. IC's) | Mass (g)                | 30          | 1.7                          | 32.0                |
| IC's (packages)             | Mass (g)                | 1.8         | 1.3                          | 25.1                |
| IC's (die)                  | Area (mm <sup>2</sup> ) | 170         | 7.3                          | 108.1               |
| Battery                     | Mass (g)                | 129         | 0.7                          | 13.0                |
| Display                     | Mass (g)                | 342         | 9.9                          | 148.4               |
| Other                       | Mass (g)                | 34          | 0.1                          | 3.3                 |
| Transport                   | Mass (g)                | 777         | 0.2                          | 3.1                 |
| Assembly                    | Products                | 1           | 0.6                          | 12.7                |
| <b>Total</b>                | Mass(g)                 | 777         | 25.5                         | 409.6               |

Table S6-XIII: Summary of bill of materials, iPad

| Subsystem                | Description                             | Process (best fit)                                   | Unit            | Measurement |
|--------------------------|-----------------------------------------|------------------------------------------------------|-----------------|-------------|
| <b>Assembly</b>          | Assembly                                | 097-Assembly - subcomponent or small product         | Pieces          | 1           |
| <b>Transport</b>         | Transport to regional assembly          | 087-Transport - SE Asia to regional assembly (per g) | Mass (g)        | 777         |
| <b>Battery</b>           | 2X Li-ion 24.8Whr 3.75V battery         | 053-Battery - Li-Ion 24.8 Whr (iPad)                 | Mass (g)        | 129         |
| <b>Display</b>           | LCD module 21x16.5 cm                   | 058-Display - LCD module                             | Mass (g)        | 154         |
| <b>Display</b>           | Glass and small plastic frame 18.5x24cm | 059-Display - Glass                                  | Mass (g)        | 188         |
| <b>Subtotal: Display</b> |                                         |                                                      | <b>Mass (g)</b> | <b>342</b>  |
| <b>Casing</b>            | Backplate, metal 19x24cm non-           | 003-Metal - aluminum (sheet)                         | Mass (g)        | 136         |

| Subsystem               | Description                                                     | Process (best fit)                                                 | Unit            | Measurement |
|-------------------------|-----------------------------------------------------------------|--------------------------------------------------------------------|-----------------|-------------|
|                         | magnetic                                                        |                                                                    |                 |             |
| <b>Casing</b>           | Metal screws                                                    | 002-Metal - steel (screws)                                         | Mass (g)        | 2.1         |
| <b>Casing</b>           | Metal and plastic tabs                                          | 001-Metal - steel (sheet)                                          | Mass (g)        | 1.0         |
| <b>Casing</b>           | Metal and plastic tabs                                          | 008-Plastic - ABS                                                  | Mass (g)        | 1.0         |
| <b>Casing</b>           | Bottom plate light plastic                                      | 008-Plastic - ABS                                                  | Mass (g)        | 11          |
| <b>Subtotal: Casing</b> |                                                                 |                                                                    | <b>Mass (g)</b> | <b>151</b>  |
| <b>Mainboard</b>        | Main logic board, 10 layer, approx. 5x11cm                      | 023-Electronics - PCB (10 layer, bare)                             | Mass (g)        | 12          |
| <b>Mainboard</b>        | 2X solid state memory, 8GB each, 52-pin 14x18mm 0.3g each       | 037-Electronics - IC, packaged RAM chip                            | Mass (g)        | 0.6         |
| <b>Mainboard</b>        | Silicon die, by area ratio                                      | 095-Silicon die - 2007 process (65 nm)                             | Area (mm^2)     | 39          |
| <b>Mainboard</b>        | A4 processor; 14x14mm package; chip 7x7mm; 551-pin; SMT package | 036-Electronics - IC, large BGA SMT, no PCB (672 pin)              | Mass (g)        | 0.6         |
| <b>Mainboard</b>        | Silicon die, exposed                                            | 095-Silicon die - 2007 process (65 nm)                             | Area (mm^2)     | 49          |
| <b>Mainboard</b>        | Silicon die, 2X stacked memory (via 3rd party teardown)         | 095-Silicon die - 2007 process (65 nm)                             | Area (mm^2)     | 71          |
| <b>Mainboard</b>        | Small coils (box-type)                                          | 048-Electronics - Inductor, chip (small box)                       | Mass (g)        | 1.9         |
| <b>Mainboard</b>        | Medium IC's: 2x100pin; 2x121pin; 1x 64pin; 0.5g total           | 038-Electronics - IC, medium SMT, >= 64 pin                        | Mass (g)        | 0.5         |
| <b>Mainboard</b>        | Silicon die, by mass ratio                                      | 095-Silicon die - 2007 process (65 nm)                             | Area (mm^2)     | 9.2         |
| <b>Mainboard</b>        | Small IC's                                                      | 040-Electronics - IC, tiny < 0.1g                                  | Mass (g)        | 1.6         |
| <b>Mainboard</b>        | Misc. on-board connectors                                       | 081-Electronics - connectors - misc. on-board plugs and connectors | Mass (g)        | 1.2         |
| <b>Mainboard</b>        | RF shielding - magnetic metal                                   | 001-Metal - steel (sheet)                                          | Mass (g)        | 9.2         |
| <b>Mainboard</b>        | Wireless assembly -small logic board 25x10mm                    | 019-Electronics - PCB (2 layer, bare)                              | Mass (g)        | 0.8         |
| <b>Mainboard</b>        | Chip - bare die mounted, very small                             | 035-Electronics - IC, large BGA SMT, no PCB (256 pin)              | Mass (g)        | 0.1         |
| <b>Mainboard</b>        | Silicon die, by mass ratio                                      | 095-Silicon die - 2007 process (65 nm)                             | Area (mm^2)     | 1.8         |



| Subsystem                                        | Description                           | Process (best fit)                                                                                    | Unit            | Measurement |
|--------------------------------------------------|---------------------------------------|-------------------------------------------------------------------------------------------------------|-----------------|-------------|
| Mainboard                                        | Metal shield                          | 001-Metal - steel (sheet)                                                                             | Mass (g)        | 0.2         |
| Mainboard                                        | Connector port for main plug cable    | 081-Electronics - connectors - misc. on-board plugs and connectors                                    | Mass (g)        | 2.4         |
| <b>Subtotal: Circuit boards (total)</b>          |                                       |                                                                                                       | <b>Mass (g)</b> | <b>32</b>   |
| <b>Subtotal: Circuit boards (excluding IC's)</b> |                                       |                                                                                                       | <b>Mass (g)</b> | <b>30</b>   |
| Power supply                                     | PC plastic casing                     | 010-Plastic - PC                                                                                      | Mass (g)        | 17          |
| Power supply                                     | AC plug with plastic coating          | 075-Electronics - ports - AC power plug                                                               | Mass (g)        | 18          |
| Power supply                                     | Plastic piece                         | 010-Plastic - PC                                                                                      | Mass (g)        | 3.4         |
| Power supply                                     | Metal piece (non-magnetic)            | 003-Metal - aluminum (sheet)                                                                          | Mass (g)        | 3.4         |
| Power supply                                     | Power connector                       | 081-Electronics - connectors - misc. on-board plugs and connectors                                    | Mass (g)        | 4.1         |
| Power supply                                     | Tiny power supply mainboard (5x2.5cm) | 019-Electronics - PCB (2 layer, bare)                                                                 | Mass (g)        | 1.5         |
| Power supply                                     | Tiny IC's and SMT components          | 040-Electronics - IC, tiny < 0.1g                                                                     | Mass (g)        | 2.0         |
| Power supply                                     | USB port                              | 073-Electronics - ports - small metal (USB, firewire, ethernet)                                       | Mass (g)        | 2.1         |
| Power supply                                     | Cylindrical electrolytic caps         | 043-Electronics - Capacitor, electrolytic cylindrical, radial (both leads on the same side) - by mass | Mass (g)        | 4.6         |
| Power supply                                     | Coils, large wound                    | 049-Electronics - Inductor, large cylindrical wound                                                   | Mass (g)        | 10          |
| Power supply                                     | Ceramic caps                          | 045-Electronics - Capacitor, ceramic (button)                                                         | Mass (g)        | 1.2         |
| Power supply                                     | Plastic bits                          | 008-Plastic - ABS                                                                                     | Mass (g)        | 1.0         |
| Power supply                                     | Other bits                            | 040-Electronics - IC, tiny < 0.1g                                                                     | Mass (g)        | 1.0         |
| Power supply                                     | USB cable                             | 082-Electronics - cables - power cords, thick cables and cords                                        | Mass (g)        | 20          |
| <b>Subtotal: Power supply</b>                    |                                       |                                                                                                       | <b>Mass (g)</b> | <b>89</b>   |
| Interior parts                                   | Plastic/rubber strip                  | 012-Plastic - silicone rubber                                                                         | Mass (g)        | 4.4         |

| Subsystem                        | Description                                        | Process (best fit)                                                 | Unit               | Measurement |
|----------------------------------|----------------------------------------------------|--------------------------------------------------------------------|--------------------|-------------|
| Interior parts                   | Connector                                          | 081-Electronics - connectors - misc. on-board plugs and connectors | Mass (g)           | 1.5         |
| Interior parts                   | Speakers 2x3g                                      | 071-Electronics - components - speaker                             | Mass (g)           | 6.0         |
| Interior parts                   | Antenna                                            | 084-Electronics - cables - small cables and wires                  | Mass (g)           | 1.1         |
| Interior parts                   | Shield for antenna - thin metal foil, non-magnetic | 003-Metal - aluminum (sheet)                                       | Mass (g)           | 1.2         |
| Interior parts                   | Plastic housing for battery                        | 008-Plastic - ABS                                                  | Mass (g)           | 20          |
| <b>Subtotal: Other</b>           |                                                    |                                                                    | <b>Mass (g)</b>    | <b>34</b>   |
| <b>Subtotal: IC's (packages)</b> |                                                    |                                                                    | <b>Mass (g)</b>    | <b>1.8</b>  |
| <b>Subtotal: IC's (die)</b>      |                                                    |                                                                    | <b>Area (mm^2)</b> | <b>170</b>  |
|                                  |                                                    |                                                                    |                    |             |
| <b>Total</b>                     |                                                    |                                                                    | <b>Mass (g)</b>    | <b>777</b>  |

Table S6-XIV: Full bill of materials, iPad

## H. Apple iPod Touch

This product is an Apple iPod touch 8gb. 3rd generation, circa 2009 manufacture, with dimensions 11cm x 6cm x 0.5cm, and total mass 198g, excluding external packaging, but including an 89g external power supply.

| Category                    | Unit                    | Measurement | GHG (kg CO <sub>2</sub> -eq) | Primary energy (MJ) |
|-----------------------------|-------------------------|-------------|------------------------------|---------------------|
| Power supply                | Mass (g)                | 89          | 2.3                          | 42.2                |
| Casing                      | Mass (g)                | 49          | 0.4                          | 7.2                 |
| Circuit boards (excl. IC's) | Mass (g)                | 6.0         | 0.4                          | 7.0                 |
| IC's (packages)             | Mass (g)                | 0.8         | 0.6                          | 11.1                |
| IC's (die)                  | Area (mm <sup>2</sup> ) | 52          | 2.2                          | 33.0                |
| Battery                     | Mass (g)                | 16          | 0.1                          | 1.6                 |
| Display                     | Mass (g)                | 35          | 0.8                          | 11.4                |
| Other                       | Mass (g)                | 2.8         | 0.0                          | 0.3                 |
| Transport                   | Mass (g)                | 198         | 0.0                          | 0.8                 |
| Assembly                    | Products                | 1           | 0.6                          | 12.7                |
| <b>Total</b>                | Mass(g)                 | 198         | 7.5                          | 127.1               |

Table S6-XV: Summary of bill of materials, iPod touch

| Subsystem        | Description                         | Process (best fit)                                   | Unit     | Measurement |
|------------------|-------------------------------------|------------------------------------------------------|----------|-------------|
| <b>Assembly</b>  | Assembly                            | 097-Assembly - subcomponent or small product         | Products | 1           |
| <b>Transport</b> | Transport to regional assembly      | 087-Transport - SE Asia to regional assembly (per g) | Mass (g) | 198         |
| <b>Battery</b>   | Li-ion polymer battery 3.7V 2.83Whr | 055-Battery - Li-Ion 2.83 Whr (iPod touch)           | Mass (g) | 16          |

| Subsystem                | Description                                             | Process (best fit)                                                 | Unit            | Measurement |
|--------------------------|---------------------------------------------------------|--------------------------------------------------------------------|-----------------|-------------|
| Casing                   | Backplate - non-magnetic metal                          | 003-Metal - aluminum (sheet)                                       | Mass (g)        | 33          |
| Casing                   | Interior metal plating, non-magnetic                    | 003-Metal - aluminum (sheet)                                       | Mass (g)        | 15          |
| Casing                   | Metal screws                                            | 002-Metal - steel (screws)                                         | Mass (g)        | 0.4         |
| <b>Subtotal: Casing</b>  |                                                         |                                                                    | <b>Mass (g)</b> | <b>49</b>   |
| Display                  | Front glass                                             | 059-Display - Glass                                                | Mass (g)        | 24          |
| Display                  | LCD module 55x83mm                                      | 058-Display - LCD module                                           | Mass (g)        | 11          |
| <b>Subtotal: Display</b> |                                                         |                                                                    | <b>Mass (g)</b> | <b>35</b>   |
| Mainboard                | Mainboard 42x27mm 2 layer                               | 019-Electronics - PCB (2 layer, bare)                              | Mass (g)        | 1.9         |
| Mainboard                | RF shielding - light magnetic metal                     | 001-Metal - steel (sheet)                                          | Mass (g)        | 1.3         |
| Mainboard                | Ribbon connector                                        | 081-Electronics - connectors - misc. on-board plugs and connectors | Mass (g)        | 0.7         |
| Mainboard                | Apple ARM CPU 12x12mm 333 pin plastic package           | 035-Electronics - IC, large BGA SMT, no PCB (256 pin)              | Mass (g)        | 0.3         |
| Mainboard                | Silicon die, by area ratio                              | 095-Silicon die - 2007 process (65 nm)                             | Area (mm^2)     | 11          |
| Mainboard                | Silicon die, 2X stacked memory (via 3rd party teardown) | 095-Silicon die - 2007 process (65 nm)                             | Area (mm^2)     | 16          |
| Mainboard                | Samsung RAM 52pin 14x19mm                               | 037-Electronics - IC, packaged RAM chip                            | Mass (g)        | 0.3         |
| Mainboard                | Silicon die, by area ratio                              | 095-Silicon die - 2007 process (65 nm)                             | Area (mm^2)     | 21          |
| Mainboard                | Small IC                                                | 040-Electronics - IC, tiny < 0.1g                                  | Mass (g)        | 0.3         |
| Mainboard                | Small IC's and tiny bits                                | 040-Electronics - IC, tiny < 0.1g                                  | Mass (g)        | 0.3         |
| Daughtercards            | Bottom assembly - small printed circuit 3cm^2           | 019-Electronics - PCB (2 layer, bare)                              | Mass (g)        | 0.5         |
| Daughtercards            | Bottom assembly - small IC memory type 50-pin           | 037-Electronics - IC, packaged RAM chip                            | Mass (g)        | 0.2         |
| Daughtercards            | Silicon die, by mass ratio                              | 095-Silicon die - 2007 process (65 nm)                             | Area (mm^2)     | 3.7         |
| Daughtercards            | Bottom assembly - RF shield - non-magnetic metal        | 003-Metal - aluminum (sheet)                                       | Mass (g)        | 0.1         |
| Daughtercards            | Bottom assembly - plastic piece                         | 008-Plastic - ABS                                                  | Mass (g)        | 0.5         |

| Subsystem                                        | Description                           | Process (best fit)                                                                                    | Unit            | Measurement |
|--------------------------------------------------|---------------------------------------|-------------------------------------------------------------------------------------------------------|-----------------|-------------|
| <b>Daughtercards</b>                             | Bottom assembly - small speaker       | 071-Electronics - components - speaker                                                                | Mass (g)        | 0.4         |
| <b>Subtotal: Circuit boards (total)</b>          |                                       |                                                                                                       | <b>Mass (g)</b> | <b>7</b>    |
| <b>Subtotal: Circuit boards (excluding IC's)</b> |                                       |                                                                                                       | <b>Mass (g)</b> | <b>6</b>    |
| <b>Power supply</b>                              | PC plastic casing                     | 010-Plastic - PC                                                                                      | Mass (g)        | 17          |
| <b>Power supply</b>                              | AC plug with plastic coating          | 075-Electronics - ports - AC power plug                                                               | Mass (g)        | 18          |
| <b>Power supply</b>                              | Plastic piece                         | 010-Plastic - PC                                                                                      | Mass (g)        | 3.4         |
| <b>Power supply</b>                              | Metal piece (non-magnetic)            | 003-Metal - aluminum (sheet)                                                                          | Mass (g)        | 3.4         |
| <b>Power supply</b>                              | Power connector                       | 081-Electronics - connectors - misc. on-board plugs and connectors                                    | Mass (g)        | 4.1         |
| <b>Power supply</b>                              | Tiny power supply mainboard (5x2.5cm) | 019-Electronics - PCB (2 layer, bare)                                                                 | Mass (g)        | 1.5         |
| <b>Power supply</b>                              | Tiny IC's and SMT components          | 040-Electronics - IC, tiny < 0.1g                                                                     | Mass (g)        | 2.0         |
| <b>Power supply</b>                              | USB port                              | 073-Electronics - ports - small metal (USB, firewire, ethernet)                                       | Mass (g)        | 2.1         |
| <b>Power supply</b>                              | Cylindrical electrolytic caps         | 043-Electronics - Capacitor, electrolytic cylindrical, radial (both leads on the same side) - by mass | Mass (g)        | 4.6         |
| <b>Power supply</b>                              | Coils, large wound                    | 049-Electronics - Inductor, large cylindrical wound                                                   | Mass (g)        | 10          |
| <b>Power supply</b>                              | Ceramic caps                          | 045-Electronics - Capacitor, ceramic (button)                                                         | Mass (g)        | 1.2         |
| <b>Power supply</b>                              | Plastic bits                          | 008-Plastic - ABS                                                                                     | Mass (g)        | 1.0         |
| <b>Power supply</b>                              | Other bits                            | 040-Electronics - IC, tiny < 0.1g                                                                     | Mass (g)        | 1.0         |
| <b>Power supply</b>                              | USB cable                             | 082-Electronics - cables - power cords, thick cables and cords                                        | Mass (g)        | 20          |
| <b>Subtotal: Power supply</b>                    |                                       |                                                                                                       | <b>Mass (g)</b> | <b>89</b>   |
| <b>Interior parts</b>                            | Flexible printed ribbon cable         | 013-Plastic - polystyrene film (flex circuit board)                                                   | Mass (g)        | 1.5         |
| <b>Interior parts</b>                            | Small black plastic internal framing  | 008-Plastic - ABS                                                                                     | Mass (g)        | 0.8         |
| <b>Interior parts</b>                            | Silicone rubber piece                 | 012-Plastic - silicone rubber                                                                         | Mass (g)        | 0.5         |
| <b>Subtotal: Other</b>                           |                                       |                                                                                                       | <b>Mass (g)</b> | <b>2.8</b>  |

| Subsystem | Description                      | Process (best fit) | Unit               | Measurement |
|-----------|----------------------------------|--------------------|--------------------|-------------|
|           |                                  |                    |                    |             |
|           | <b>Subtotal: IC's (packages)</b> |                    | <b>Mass (g)</b>    | <b>0.8</b>  |
|           | <b>Subtotal: IC's (die)</b>      |                    | <b>Area (mm^2)</b> | <b>52</b>   |
|           | <b>Total</b>                     |                    | <b>Mass (g)</b>    | <b>198</b>  |

Table S6-XVI: Full bill of materials, iPod touch

## I. Amazon Kindle

This product is an Amazon Kindle 3rd generation Wi-Fi model, circa 2010 manufacture, with dimensions 19cm x 12.5cm x 0.5cm, and total mass 312g, excluding external packaging, but including an 89g external power supply.

| Category                    | Unit                    | Measurement | GHG (kg CO <sub>2</sub> -eq) | Primary energy (MJ) |
|-----------------------------|-------------------------|-------------|------------------------------|---------------------|
| Power supply                | Mass (g)                | 89          | 2.3                          | 42.2                |
| Casing                      | Mass (g)                | 59          | 0.5                          | 7.9                 |
| Circuit boards (excl. IC's) | Mass (g)                | 33          | 2.4                          | 44.8                |
| IC's (packages)             | Mass (g)                | 1.6         | 1.2                          | 22.3                |
| IC's (die)                  | Area (mm <sup>2</sup> ) | 66          | 3.6                          | 53.0                |
| Battery                     | Mass (g)                | 51          | 0.3                          | 5.1                 |
| Display                     | Mass (g)                | 34          | 2.0                          | 29.8                |
| Other                       | Mass (g)                | 45          | 0.3                          | 6.0                 |
| Transport                   | Mass (g)                | 312         | 0.1                          | 1.2                 |
| Assembly                    | Products                | 1           | 0.6                          | 12.7                |
| <b>Total</b>                | Mass(g)                 | 312         | 13.3                         | 225.1               |

Table S6-XVII: Summary of bill of materials, Amazon Kindle

| Subsystem | Description                                       | Process (best fit)                                   | Unit     | Measurement |
|-----------|---------------------------------------------------|------------------------------------------------------|----------|-------------|
| Assembly  | Assembly                                          | 097-Assembly - subcomponent or small product         | Products | 1           |
| Transport | Transport to regional assembly                    | 087-Transport - SE Asia to regional assembly (per g) | Mass (g) | 312         |
| Battery   | Li-ion battery 7x10cm 3.7V 6.5Wh minimum capacity | 053-Battery - Li-Ion 24.8 Whr (iPad)                 | Mass (g) | 51          |
| Display   | E-ink display module, 10x14cm                     | 060-Display - E-ink module                           | Mass (g) | 34          |
| Casing    | Plastic backplate "PC CM-10 2" plastic            | 010-Plastic - PC                                     | Mass (g) | 36          |
| Casing    | Plastic frontplate "PC CM-10 2" plastic           | 010-Plastic - PC                                     | Mass (g) | 21          |

| Subsystem                                        | Description                                 | Process (best fit)                                                 | Unit            | Measurement |
|--------------------------------------------------|---------------------------------------------|--------------------------------------------------------------------|-----------------|-------------|
| <b>Casing</b>                                    | Metal screws, magnetic                      | 002-Metal - steel (screws)                                         | Mass (g)        | 1.5         |
| <b>Subtotal: Casing</b>                          |                                             |                                                                    | <b>Mass (g)</b> | <b>59</b>   |
| <b>Mainboard</b>                                 | Mainboard - 6 layer bare PCB 7x19.5 + 4x4cm | 021-Electronics - PCB (6 layer, bare)                              | Mass (g)        | 21          |
| <b>Mainboard</b>                                 | 16x16mm flat package 400-pin BGA            | 035-Electronics - IC, large BGA SMT, no PCB (256 pin)              | Mass (g)        | 0.7         |
| <b>Mainboard</b>                                 | 18x14mm flat package 188-pin BGA (Samsung)  | 034-Electronics - IC, large BGA SMT, no PCB (144 pin)              | Mass (g)        | 0.3         |
| <b>Mainboard</b>                                 | 12x12mm flat package 188-pin BGA            | 034-Electronics - IC, large BGA SMT, no PCB (144 pin)              | Mass (g)        | 0.3         |
| <b>Mainboard</b>                                 | 12x8mm Samsung RAM-type 90-pin              | 037-Electronics - IC, packaged RAM chip                            | Mass (g)        | 0.1         |
| <b>Mainboard</b>                                 | 10x10mm 144-pin BGA                         | 034-Electronics - IC, large BGA SMT, no PCB (144 pin)              | Mass (g)        | 0.2         |
| <b>Mainboard</b>                                 | Silicon die, by area ratio                  | 096-Silicon die - 2010 process (45 nm)                             | Area (mm^2)     | 66          |
| <b>Mainboard</b>                                 | Small connectors                            | 081-Electronics - connectors - misc. on-board plugs and connectors | Mass (g)        | 1.3         |
| <b>Mainboard</b>                                 | Tiny bits                                   | 040-Electronics - IC, tiny < 0.1g                                  | Mass (g)        | 2.0         |
| <b>Mainboard</b>                                 | RF shielding, non-magnetic metal            | 003-Metal - aluminum (sheet)                                       | Mass (g)        | 9.0         |
| <b>Subtotal: Circuit boards (total)</b>          |                                             |                                                                    | <b>Mass (g)</b> | <b>35</b>   |
| <b>Subtotal: Circuit boards (excluding IC's)</b> |                                             |                                                                    | <b>Mass (g)</b> | <b>33</b>   |
| <b>Power supply</b>                              | PC plastic casing                           | 010-Plastic - PC                                                   | Mass (g)        | 17          |
| <b>Power supply</b>                              | AC plug with plastic coating                | 075-Electronics - ports - AC power plug                            | Mass (g)        | 18          |
| <b>Power supply</b>                              | Plastic piece                               | 010-Plastic - PC                                                   | Mass (g)        | 3.4         |
| <b>Power supply</b>                              | Metal piece (non-magnetic)                  | 003-Metal - aluminum (sheet)                                       | Mass (g)        | 3.4         |
| <b>Power supply</b>                              | Power connector                             | 081-Electronics - connectors - misc. on-board plugs and connectors | Mass (g)        | 4.1         |
| <b>Power supply</b>                              | Power supply mainboard (5x2.5cm)            | 019-Electronics - PCB (2 layer, bare)                              | Mass (g)        | 1.5         |
| <b>Power supply</b>                              | Tiny IC's and SMT components                | 040-Electronics - IC, tiny < 0.1g                                  | Mass (g)        | 2.0         |
| <b>Power supply</b>                              | USB port                                    | 073-Electronics - ports - small metal (USB, firewire, ethernet)    | Mass (g)        | 2.1         |



| Subsystem                        | Description                             | Process (best fit)                                                                                    | Unit               | Measurement |
|----------------------------------|-----------------------------------------|-------------------------------------------------------------------------------------------------------|--------------------|-------------|
| <b>Power supply</b>              | Cylindrical electrolytic caps           | 043-Electronics - Capacitor, electrolytic cylindrical, radial (both leads on the same side) - by mass | Mass (g)           | 4.6         |
| <b>Power supply</b>              | Coils, large wound                      | 049-Electronics - Inductor, large cylindrical wound                                                   | Mass (g)           | 10          |
| <b>Power supply</b>              | Ceramic caps                            | 045-Electronics - Capacitor, ceramic (button)                                                         | Mass (g)           | 1.2         |
| <b>Power supply</b>              | Plastic bits                            | 008-Plastic - ABS                                                                                     | Mass (g)           | 1.0         |
| <b>Power supply</b>              | Other bits                              | 040-Electronics - IC, tiny < 0.1g                                                                     | Mass (g)           | 1.0         |
| <b>Power supply</b>              | USB cable                               | 082-Electronics - cables - power cords, thick cables and cords                                        | Mass (g)           | 20          |
| <b>Subtotal: Power supply</b>    |                                         |                                                                                                       | <b>Mass (g)</b>    | <b>89</b>   |
| <b>Interior parts</b>            | Metal internal backplate (non-magnetic) | 003-Metal - aluminum (sheet)                                                                          | Mass (g)           | 25          |
| <b>Interior parts</b>            | ABS plastic pieces                      | 008-Plastic - ABS                                                                                     | Mass (g)           | 16          |
| <b>Interior parts</b>            | Flexible rubber keyboard                | 012-Plastic - silicone rubber                                                                         | Mass (g)           | 3.3         |
| <b>Interior parts</b>            | Connector                               | 081-Electronics - connectors - misc. on-board plugs and connectors                                    | Mass (g)           | 1.0         |
| <b>Subtotal: Other</b>           |                                         |                                                                                                       | <b>Mass (g)</b>    | <b>45</b>   |
| <b>Subtotal: IC's (packages)</b> |                                         |                                                                                                       | <b>Mass (g)</b>    | <b>1.6</b>  |
| <b>Subtotal: IC's (die)</b>      |                                         |                                                                                                       | <b>Area (mm^2)</b> | <b>66</b>   |
| <b>Total</b>                     |                                         |                                                                                                       | <b>Mass(g)</b>     | <b>312</b>  |

Table S6-XVIII: Full bill of materials, Amazon Kindle

## J. Dell rack server

This product is Dell PowerEdge rack server, model EMU 3710P71, circa 2005 manufacture, with dimensions 44cm x 76.5cm x 4.5cm, and total mass 15471g, excluding external packaging.

| Category                    | Unit                    | Measurement  | GHG (kg CO <sub>2</sub> -eq) | Primary energy (MJ) |
|-----------------------------|-------------------------|--------------|------------------------------|---------------------|
| Power supply                | Mass (g)                | 2911         | 89.3                         | 1653.4              |
| Casing                      | Mass (g)                | 8767         | 18.5                         | 302.4               |
| Circuit boards (excl. IC's) | Mass (g)                | 2199         | 128.8                        | 2407.3              |
| IC's (packages)             | Mass (g)                | 88           | 50.8                         | 1008.2              |
| IC's (die)                  | Area (mm <sup>2</sup> ) | 1683         | 72.4                         | 961.0               |
| Battery                     | Mass (g)                | 0            | 0.0                          | 0.0                 |
| Display                     | Mass (g)                | 0            | 0.0                          | 0.0                 |
| Other                       | Mass (g)                | 1506         | 18.2                         | 341.9               |
| Transport                   | Mass (g)                | 15471        | 3.9                          | 61.7                |
| Assembly                    | Products                | 1            | 1.2                          | 25.3                |
| <b>Total</b>                | <b>Mass(g)</b>          | <b>15471</b> | <b>383.1</b>                 | <b>6761.1</b>       |

Table S6-XIX: Summary of bill of materials, rack server

| Subsystem               | Description                    | Process (best fit)                                   | Unit            | Measurement |
|-------------------------|--------------------------------|------------------------------------------------------|-----------------|-------------|
| <b>Assembly</b>         | Assembly                       | 099-Assembly - large product                         | Products        | 1           |
| <b>Transport</b>        | Transport to regional assembly | 087-Transport - SE Asia to regional assembly (per g) | Mass (g)        | 15471       |
| <b>Casing</b>           | Bottom plate - magnetic        | 001-Metal - steel (sheet)                            | Mass (g)        | 2190        |
| <b>Casing</b>           | Main internal frame - magnetic | 001-Metal - steel (sheet)                            | Mass (g)        | 6550        |
| <b>Casing</b>           | Screws                         | 002-Metal - steel (screws)                           | Mass (g)        | 27          |
| <b>Subtotal: Casing</b> |                                |                                                      | <b>Mass (g)</b> | <b>8767</b> |
| <b>Power supply 1</b>   | Metal casing - magnetic        | 001-Metal - steel (sheet)                            | Mass (g)        | 200         |
| <b>Power supply 1</b>   | Metal casing - magnetic        | 001-Metal - steel (sheet)                            | Mass (g)        | 360         |

| Subsystem             | Description               | Process (best fit)                                                                                    | Unit     | Measurement |
|-----------------------|---------------------------|-------------------------------------------------------------------------------------------------------|----------|-------------|
| <b>Power supply 1</b> | Papery housing            | 018-Paper                                                                                             | Mass (g) | 16          |
| <b>Power supply 1</b> | Fan - double CPU fan      | 065-Electronics - components - small CPU fan                                                          | Mass (g) | 90          |
| <b>Power supply 1</b> | Metal screws and bolts    | 002-Metal - steel (screws)                                                                            | Mass (g) | 21          |
| <b>Power supply 1</b> | Copper plates             | 004-Metal - copper (sheet)                                                                            | Mass (g) | 210         |
| <b>Power supply 1</b> | PCB, 8-layer, 26x7.6cm    | 022-Electronics - PCB (8 layer, bare)                                                                 | Mass (g) | 91          |
| <b>Power supply 1</b> | Coils, large wound        | 049-Electronics - Inductor, large cylindrical wound                                                   | Mass (g) | 246         |
| <b>Power supply 1</b> | Caps, electrolytic        | 043-Electronics - Capacitor, electrolytic cylindrical, radial (both leads on the same side) - by mass | Mass (g) | 115         |
| <b>Power supply 1</b> | Metal plate, non-magnetic | 003-Metal - aluminum (sheet)                                                                          | Mass (g) | 6.6         |
| <b>Power supply 1</b> | Power transistors         | 042-Electronics - Transistor, large/power                                                             | Mass (g) | 46          |
| <b>Power supply 1</b> | Connectors                | 081-Electronics - connectors - misc. on-board plugs and connectors                                    | Mass (g) | 29          |
| <b>Power supply 1</b> | Misc. bits                | 040-Electronics - IC, tiny < 0.1g                                                                     | Mass (g) | 25          |
| <b>Power supply 2</b> | Metal casing - magnetic   | 001-Metal - steel (sheet)                                                                             | Mass (g) | 200         |
| <b>Power supply 2</b> | Metal casing - magnetic   | 001-Metal - steel (sheet)                                                                             | Mass (g) | 360         |
| <b>Power supply 2</b> | Papery housing            | 018-Paper                                                                                             | Mass (g) | 16          |
| <b>Power supply 2</b> | Fan - double CPU fan      | 065-Electronics - components - small CPU fan                                                          | Mass (g) | 90          |
| <b>Power supply 2</b> | Metal screws and bolts    | 002-Metal - steel (screws)                                                                            | Mass (g) | 21          |
| <b>Power supply 2</b> | Copper plates             | 004-Metal - copper (sheet)                                                                            | Mass (g) | 210         |
| <b>Power supply 2</b> | PCB, 8-layer, 26x7.6cm    | 022-Electronics - PCB (8 layer, bare)                                                                 | Mass (g) | 91          |
| <b>Power supply 2</b> | Coils, large wound        | 049-Electronics - Inductor, large cylindrical wound                                                   | Mass (g) | 246         |
| <b>Power supply 2</b> | Caps, electrolytic        | 043-Electronics - Capacitor, electrolytic cylindrical, radial (both leads on the same side) - by mass | Mass (g) | 115         |
| <b>Power supply 2</b> | Metal plate, non-magnetic | 003-Metal - aluminum (sheet)                                                                          | Mass (g) | 6.6         |

| Subsystem                     | Description                                                                 | Process (best fit)                                                                                    | Unit            | Measurement |
|-------------------------------|-----------------------------------------------------------------------------|-------------------------------------------------------------------------------------------------------|-----------------|-------------|
| <b>Power supply 2</b>         | Power transistors                                                           | 042-Electronics - Transistor, large/power                                                             | Mass (g)        | 46          |
| <b>Power supply 2</b>         | Connectors                                                                  | 081-Electronics - connectors - misc. on-board plugs and connectors                                    | Mass (g)        | 29          |
| <b>Power supply 2</b>         | Misc. bits                                                                  | 040-Electronics - IC, tiny < 0.1g                                                                     | Mass (g)        | 25          |
| <b>Subtotal: Power supply</b> |                                                                             |                                                                                                       | <b>Mass (g)</b> | <b>2911</b> |
| <b>Mainboard</b>              | Main logic board - 14-layer, 15*41 + 48*25cm                                | 024-Electronics - PCB (12 layer, bare)                                                                | Mass (g)        | 760         |
| <b>Mainboard</b>              | Connectors                                                                  | 081-Electronics - connectors - misc. on-board plugs and connectors                                    | Mass (g)        | 250         |
| <b>Mainboard</b>              | Large caps                                                                  | 043-Electronics - Capacitor, electrolytic cylindrical, radial (both leads on the same side) - by mass | Mass (g)        | 86          |
| <b>Mainboard</b>              | Large coils                                                                 | 049-Electronics - Inductor, large cylindrical wound                                                   | Mass (g)        | 52          |
| <b>Mainboard</b>              | Battery CR2032 3V                                                           | 056-Battery - CR2032 3V Li-Ion (CMOS)                                                                 | Mass (g)        | 2.8         |
| <b>Mainboard</b>              | Small on-board batteries                                                    | 057-Battery - small on-board                                                                          | Mass (g)        | 2.3         |
| <b>Mainboard</b>              | Tiny IC's and little bits                                                   | 040-Electronics - IC, tiny < 0.1g                                                                     | Mass (g)        | 18          |
| <b>Mainboard</b>              | Large IC 1077-pin mounted bare die, PCB 42x42mm, die 11x9mm                 | 033-Electronics - IC, large BGA (mounted bare die, 672 pin)                                           | Mass (g)        | 7.9         |
| <b>Mainboard</b>              | Silicon die                                                                 | 094-Silicon die - 2004 process (90 nm)                                                                | Area (mm^2)     | 99          |
| <b>Mainboard</b>              | Large IC 569-pin mounted bare die, PCB 31x31mm, die 7x8mm                   | 033-Electronics - IC, large BGA (mounted bare die, 672 pin)                                           | Mass (g)        | 3.3         |
| <b>Mainboard</b>              | Large IC 460-pin mounted package, PCB 31x31mm, package 25mm                 | 027-Electronics - IC, large BGA (mounted, plastic package, 672 pin)                                   | Mass (g)        | 3.3         |
| <b>Mainboard</b>              | Silicon die, via area ratio                                                 | 094-Silicon die - 2004 process (90 nm)                                                                | Area (mm^2)     | 49          |
| <b>Mainboard</b>              | Large IC multi-chip package, 169-pin, 2 packaged IC's 29x17mm, 12x12mm, PCB | 026-Electronics - IC, large BGA (mounted, plastic package, 256 pin)                                   | Mass (g)        | 2.8         |

| Subsystem        | Description                                                     | Process (best fit)                                                  | Unit        | Measurement |
|------------------|-----------------------------------------------------------------|---------------------------------------------------------------------|-------------|-------------|
|                  | 31x31mm                                                         |                                                                     |             |             |
| <b>Mainboard</b> | Silicon die, via area ratio                                     | 094-Silicon die - 2004 process (90 nm)                              | Area (mm^2) | 50          |
| <b>Mainboard</b> | 196-pin mounted package, 15x15mm, 14x14 package                 | 025-Electronics - IC, large BGA (mounted, plastic package, 144 pin) | Mass (g)    | 0.4         |
| <b>Mainboard</b> | Silicon die, via area ratio                                     | 094-Silicon die - 2004 process (90 nm)                              | Area (mm^2) | 15          |
| <b>Mainboard</b> | 196-pin mounted package, 15x15mm, 14x14 package                 | 025-Electronics - IC, large BGA (mounted, plastic package, 144 pin) | Mass (g)    | 0.4         |
| <b>Mainboard</b> | Silicon die, via area ratio                                     | 094-Silicon die - 2004 process (90 nm)                              | Area (mm^2) | 15          |
| <b>Mainboard</b> | 136-pin SMT                                                     | 038-Electronics - IC, medium SMT, >= 64 pin                         | Mass (g)    | 0.4         |
| <b>Mainboard</b> | 136-pin SMT                                                     | 038-Electronics - IC, medium SMT, >= 64 pin                         | Mass (g)    |             |
| <b>Mainboard</b> | 128-pin SMT                                                     | 038-Electronics - IC, medium SMT, >= 64 pin                         | Mass (g)    | 0.4         |
| <b>Mainboard</b> | 100-pin SMT                                                     | 038-Electronics - IC, medium SMT, >= 64 pin                         | Mass (g)    | 0.4         |
| <b>Mainboard</b> | 40-pin SMT                                                      | 039-Electronics - IC, medium SMT, < 64 pin                          | Mass (g)    | 0.4         |
| <b>Mainboard</b> | 44-pin SMT                                                      | 039-Electronics - IC, medium SMT, < 64 pin                          | Mass (g)    | 0.4         |
| <b>Mainboard</b> | 48-pin SMT                                                      | 039-Electronics - IC, medium SMT, < 64 pin                          | Mass (g)    | 0.4         |
| <b>Mainboard</b> | Silicon die, via mass ratio                                     | 094-Silicon die - 2004 process (90 nm)                              | Area (mm^2) | 94          |
| <b>Mainboard</b> | Small heatsinks, non-magnetic                                   | 006-Metal - aluminum heatsink                                       | Mass (g)    | 20          |
| <b>Mainboard</b> | Small PCBs                                                      | 019-Electronics - PCB (2 layer, bare)                               | Mass (g)    | 40          |
| <b>Mainboard</b> | Heat sink - copper body with aluminum fins - aluminum component | 006-Metal - aluminum heatsink                                       | Mass (g)    | 180         |
| <b>Mainboard</b> | Heat sink - copper body with aluminum fins - copper             | 007-Metal - copper heatsink                                         | Mass (g)    | 45          |

| Subsystem            | Description                                                                                                   | Process (best fit)                                            | Unit        | Measurement |
|----------------------|---------------------------------------------------------------------------------------------------------------|---------------------------------------------------------------|-------------|-------------|
|                      | component                                                                                                     |                                                               |             |             |
| <b>Mainboard</b>     | Main CPU, Intel Xeon - mounted with heat spreader. 604-pin, heat spreader 7.4g, PCB 43x43mm, bare die 11x11mm | 030-Electronics - IC, large BGA (with heat spreader, 672 pin) | Mass (g)    | 22          |
| <b>Mainboard</b>     | Silicon die, via bare die                                                                                     | 094-Silicon die - 2004 process (90 nm)                        | Area (mm^2) | 121         |
| <b>RAM</b>           | RAM #1 PCB: 6 layer, 3 x 13cm                                                                                 | 021-Electronics - PCB (6 layer, bare)                         | Mass (g)    | 13          |
| <b>RAM</b>           | RAM IC's: 60-pin 8x12mm 18X @ 0.16g each                                                                      | 037-Electronics - IC, packaged RAM chip                       | Mass (g)    | 2.9         |
| <b>RAM</b>           | RAM: Other IC's                                                                                               | 040-Electronics - IC, tiny < 0.1g                             | Mass (g)    | 0.4         |
| <b>RAM</b>           | RAM # 2 PCB: 6 layer, 3 x 13cm                                                                                | 021-Electronics - PCB (6 layer, bare)                         | Mass (g)    | 13          |
| <b>RAM</b>           | RAM IC's: 60-pin 8x12mm 18X @ 0.16g each                                                                      | 037-Electronics - IC, packaged RAM chip                       | Mass (g)    | 2.9         |
| <b>RAM</b>           | RAM: Other IC's                                                                                               | 040-Electronics - IC, tiny < 0.1g                             | Mass (g)    | 0.4         |
| <b>RAM</b>           | RAM # 3 PCB: 6 layer, 3 x 13cm                                                                                | 021-Electronics - PCB (6 layer, bare)                         | Mass (g)    | 13          |
| <b>RAM</b>           | RAM IC's: 60-pin 8x12mm 18X @ 0.16g each                                                                      | 037-Electronics - IC, packaged RAM chip                       | Mass (g)    | 2.9         |
| <b>RAM</b>           | RAM: Other IC's                                                                                               | 040-Electronics - IC, tiny < 0.1g                             | Mass (g)    | 0.4         |
| <b>RAM</b>           | RAM # 4 PCB: 6 layer, 3 x 13cm                                                                                | 021-Electronics - PCB (6 layer, bare)                         | Mass (g)    | 13          |
| <b>RAM</b>           | RAM IC's: 60-pin 8x12mm 18X @ 0.16g each                                                                      | 037-Electronics - IC, packaged RAM chip                       | Mass (g)    | 2.9         |
| <b>RAM</b>           | RAM: Other IC's                                                                                               | 040-Electronics - IC, tiny < 0.1g                             | Mass (g)    | 0.4         |
| <b>RAM</b>           | RAM # 5 PCB: 6 layer, 3 x 13cm                                                                                | 021-Electronics - PCB (6 layer, bare)                         | Mass (g)    | 13          |
| <b>RAM</b>           | RAM IC's: 60-pin 8x12mm 18X @ 0.16g each                                                                      | 037-Electronics - IC, packaged RAM chip                       | Mass (g)    | 2.9         |
| <b>RAM</b>           | Silicon die, via area ratio                                                                                   | 094-Silicon die - 2004 process (90 nm)                        | Area (mm^2) | 674         |
| <b>RAM</b>           | RAM: Other IC's                                                                                               | 040-Electronics - IC, tiny < 0.1g                             | Mass (g)    | 0.4         |
| <b>Daughtercards</b> | Daughtercard PCB - 8 layer -                                                                                  | 022-Electronics - PCB (8 layer, bare)                         | Mass (g)    | 26          |

| Subsystem            | Description                                                     | Process (best fit)                                                                                    | Unit        | Measurement |
|----------------------|-----------------------------------------------------------------|-------------------------------------------------------------------------------------------------------|-------------|-------------|
|                      | 5x14cm                                                          |                                                                                                       |             |             |
| <b>Daughtercards</b> | Large ribbon cable                                              | 083-Electronics - cables - large ribbon cables                                                        | Mass (g)    | 29          |
| <b>Daughtercards</b> | Connectors                                                      | 081-Electronics - connectors - misc. on-board plugs and connectors                                    | Mass (g)    | 17          |
| <b>Daughtercards</b> | Small IC's                                                      | 039-Electronics - IC, medium SMT, < 64 pin                                                            | Mass (g)    | 17          |
| <b>Daughtercards</b> | Silicon die, via mass ratio                                     | 094-Silicon die - 2004 process (90 nm)                                                                | Area (mm^2) | 313         |
| <b>Daughtercards</b> | Tiny IC's                                                       | 040-Electronics - IC, tiny < 0.1g                                                                     | Mass (g)    | 1.0         |
| <b>Daughtercards</b> | Small PCB                                                       | 019-Electronics - PCB (2 layer, bare)                                                                 | Mass (g)    | 4.4         |
| <b>Daughtercards</b> | Daughtercard PCB - 8layer, 15*19 + 5*15cm                       | 022-Electronics - PCB (8 layer, bare)                                                                 | Mass (g)    | 189         |
| <b>Daughtercards</b> | Connectors                                                      | 081-Electronics - connectors - misc. on-board plugs and connectors                                    | Mass (g)    | 145         |
| <b>Daughtercards</b> | Tiny PCB's                                                      | 019-Electronics - PCB (2 layer, bare)                                                                 | Mass (g)    | 15          |
| <b>Daughtercards</b> | Caps, electrolytic                                              | 043-Electronics - Capacitor, electrolytic cylindrical, radial (both leads on the same side) - by mass | Mass (g)    | 15          |
| <b>Daughtercards</b> | Small IC's and bits                                             | 040-Electronics - IC, tiny < 0.1g                                                                     | Mass (g)    | 8.0         |
| <b>Daughtercards</b> | 48-pin SMT                                                      | 039-Electronics - IC, medium SMT, < 64 pin                                                            | Mass (g)    | 0.5         |
| <b>Daughtercards</b> | 32-pin SMT                                                      | 039-Electronics - IC, medium SMT, < 64 pin                                                            | Mass (g)    | 0.9         |
| <b>Daughtercards</b> | Silicon die, via mass ratio                                     | 094-Silicon die - 2004 process (90 nm)                                                                | Area (mm^2) | 26          |
| <b>Daughtercards</b> | Large IC, 832-pin, mounted bare die, 37x37mm PCB, 10x10mm die   | 033-Electronics - IC, large BGA (mounted bare die, 672 pin)                                           | Mass (g)    | 5.8         |
| <b>Daughtercards</b> | Silicon die, via direct measurement                             | 094-Silicon die - 2004 process (90 nm)                                                                | Area (mm^2) | 100         |
| <b>Daughtercards</b> | Large IC, 141-pin, mounted package, 35x35mm PCB 28x28mm package | 025-Electronics - IC, large BGA (mounted, plastic package, 144 pin)                                   | Mass (g)    | 4.2         |

| Subsystem                                        | Description                    | Process (best fit)                                                 | Unit            | Measurement |
|--------------------------------------------------|--------------------------------|--------------------------------------------------------------------|-----------------|-------------|
| Daughtercards                                    | Silicon die, via area ratio    | 094-Silicon die - 2004 process (90 nm)                             | Area (mm^2)     | 61          |
| Daughtercards                                    | PCB, 6 layer, 96+36+78+50cm^2  | 021-Electronics - PCB (6 layer, bare)                              | Mass (g)        | 98          |
| Daughtercards                                    | Connectors                     | 081-Electronics - connectors - misc. on-board plugs and connectors | Mass (g)        | 55          |
| Daughtercards                                    | Plastic piece, PC+ABS          | 009-Plastic - ABS + PC blend                                       | Mass (g)        | 25          |
| Daughtercards                                    | Sticker labels                 | 018-Paper                                                          | Mass (g)        | 5.0         |
| Daughtercards                                    | Large cable - connectors       | 081-Electronics - connectors - misc. on-board plugs and connectors | Mass (g)        | 28          |
| Daughtercards                                    | large cable                    | 083-Electronics - cables - large ribbon cables                     | Mass (g)        | 10          |
| Daughtercards                                    | Large LEDs 2X @ 1.7g each      | 052-Electronics - LED                                              | Mass (g)        | 3.4         |
| Daughtercards                                    | Small IC's                     | 040-Electronics - IC, tiny < 0.1g                                  | Mass (g)        | 1.7         |
| Daughtercards                                    | 144-pin 20x20mm SMT            | 038-Electronics - IC, medium SMT, >= 64 pin                        | Mass (g)        | 1.4         |
| Daughtercards                                    | 100-pin 15x15mm SMT            | 038-Electronics - IC, medium SMT, >= 64 pin                        | Mass (g)        | 0.7         |
| Daughtercards                                    | 48-pin 12x19mm SMT             | 039-Electronics - IC, medium SMT, < 64 pin                         | Mass (g)        | 0.5         |
| Daughtercards                                    | Silicon die, via area ratio    | 094-Silicon die - 2004 process (90 nm)                             | Area (mm^2)     | 67          |
| <b>Subtotal: Circuit boards (total)</b>          |                                |                                                                    | <b>Mass (g)</b> | <b>2287</b> |
| <b>Subtotal: Circuit boards (excluding IC's)</b> |                                |                                                                    | <b>Mass (g)</b> | <b>2199</b> |
| Interior parts                                   | Floppy disk drive 3.5"         | 064-Electronics - components - 3.5" floppy drive                   | Mass (g)        | 185         |
| Interior parts                                   | DVD Rom Drive                  | 061-Electronics - components - DVD drive                           | Mass (g)        | 227         |
| Interior parts                                   | Case fan - includes 2 CPU fans | 065-Electronics - components - small CPU fan                       | Mass (g)        | 86          |
| Interior parts                                   | Case fan - includes 2 CPU fans | 065-Electronics - components - small CPU fan                       | Mass (g)        | 86          |
| Interior parts                                   | Case fan - includes 2 CPU fans | 065-Electronics - components - small CPU                           | Mass (g)        | 86          |



| Subsystem             | Description                              | Process (best fit)                           | Unit               | Measurement  |
|-----------------------|------------------------------------------|----------------------------------------------|--------------------|--------------|
|                       |                                          | fan                                          |                    |              |
| <b>Interior parts</b> | Case fan - includes 2 CPU fans           | 065-Electronics - components - small CPU fan | Mass (g)           | 86           |
| <b>Interior parts</b> | Fan carriage - PC + ABS FR(40) plastic   | 009-Plastic - ABS + PC blend                 | Mass (g)           | 33           |
| <b>Interior parts</b> | Misc. pieces - PC ABS                    | 009-Plastic - ABS + PC blend                 | Mass (g)           | 154          |
| <b>Interior parts</b> | HD bay - PC ABS                          | 009-Plastic - ABS + PC blend                 | Mass (g)           | 38           |
| <b>Interior parts</b> | HD bay - magnetic metal                  | 001-Metal - steel (sheet)                    | Mass (g)           | 92           |
| <b>Interior parts</b> | Misc. piece - magnetic metal             | 001-Metal - steel (sheet)                    | Mass (g)           | 193          |
| <b>Interior parts</b> | Misc. piece - non-magnetic metal         | 005-Metal - aluminum (solid)                 | Mass (g)           | 136          |
| <b>Interior parts</b> | Heatsinks- magnetic metal, black coating | 006-Metal - aluminum heatsink                | Mass (g)           | 74           |
| <b>Interior parts</b> | Backplate - plastic, flexible            | 009-Plastic - ABS + PC blend                 | Mass (g)           | 1.0          |
| <b>Interior parts</b> | Dell Li-Ion battery                      | 055-Battery - Li-Ion 2.83 Whr (iPod touch)   | Mass (g)           | 29           |
|                       | <b>Subtotal: Other</b>                   |                                              | <b>Mass (g)</b>    | <b>1506</b>  |
|                       | <b>Subtotal: IC's (packages)</b>         |                                              | <b>Mass (g)</b>    | <b>88</b>    |
|                       | <b>Subtotal: IC's (die)</b>              |                                              | <b>Area (mm^2)</b> | <b>1683</b>  |
|                       | <b>Total</b>                             |                                              | <b>Mass (g)</b>    | <b>15471</b> |

Table S6-XX: Full bill of materials, rack server

## K. 3Com network switch

This product the 3Com 3C16464C Superstack 3 Baseline 10/100 24-port switch, circa 2003 manufacture, with dimensions 44cm x 16.5cm x 4cm, and total mass 2119g, excluding external packaging.

| Category                    | Unit                    | Measurement | GHG (kg CO <sub>2</sub> -eq) | Primary energy (MJ) |
|-----------------------------|-------------------------|-------------|------------------------------|---------------------|
| Power supply                | Mass (g)                | 193         | 10.8                         | 202.7               |
| Casing                      | Mass (g)                | 1404        | 3.8                          | 57.6                |
| Circuit boards (excl. IC's) | Mass (g)                | 460         | 25.3                         | 479.9               |
| IC's (packages)             | Mass (g)                | 47          | 34.3                         | 650.1               |
| IC's (die)                  | Area (mm <sup>2</sup> ) | 366         | 15.8                         | 233.1               |
| Battery                     | Mass (g)                | 0           | 0                            | 0                   |
| Display                     | Mass (g)                | 0           | 0                            | 0                   |
| Other                       | Mass (g)                | 16          | 0.2                          | 3.6                 |
| Transport                   | Mass (g)                | 2119        | 0.5                          | 8.5                 |
| Assembly                    | Products                | 1           | 1.2                          | 25.3                |
| <b>Total</b>                | <b>Mass(g)</b>          | <b>2119</b> | <b>91.8</b>                  | <b>1660.8</b>       |

Table S6-XXI: Summary of bill of materials, network switch

| Subsystem               | Description                                        | Process (best fit)                                   | Unit            | Measurement |
|-------------------------|----------------------------------------------------|------------------------------------------------------|-----------------|-------------|
| Assembly                | Assembly                                           | 099-Assembly - large product                         | Products        | 1           |
| Transport               | Transport to regional assembly                     | 087-Transport - SE Asia to regional assembly (per g) | Mass (g)        | 2119        |
| Casing                  | Bottom plating - magnetic metal                    | 001-Metal - steel (sheet)                            | Mass (g)        | 900         |
| Casing                  | Top plating - magnetic metal                       | 001-Metal - steel (sheet)                            | Mass (g)        | 104         |
| Casing                  | Polycarbonate plastic                              | 010-Plastic - PC                                     | Mass (g)        | 392         |
| Casing                  | Metal screws, magnetic                             | 002-Metal - steel (screws)                           | Mass (g)        | 7.8         |
| <b>Subtotal: Casing</b> |                                                    |                                                      | <b>Mass (g)</b> | <b>1404</b> |
| Power supply            | 88W power supply. Bare PCB, 2 layer, 14x6.5cm, 35g | 019-Electronics - PCB (2 layer, bare)                | Mass (g)        | 35          |

| Subsystem                     | Description                                             | Process (best fit)                                                                                    | Unit            | Measurement |
|-------------------------------|---------------------------------------------------------|-------------------------------------------------------------------------------------------------------|-----------------|-------------|
| <b>Power supply</b>           | Power plug                                              | 075-Electronics - ports - AC power plug                                                               | Mass (g)        | 22          |
| <b>Power supply</b>           | Power cable, internal: 6 wires and connector            | 084-Electronics - cables - small cables and wires                                                     | Mass (g)        | 6.3         |
| <b>Power supply</b>           | Large coil                                              | 049-Electronics - Inductor, large cylindrical wound                                                   | Mass (g)        | 48          |
| <b>Power supply</b>           | Large coil                                              | 049-Electronics - Inductor, large cylindrical wound                                                   | Mass (g)        | 17          |
| <b>Power supply</b>           | Large cap 23x30mm                                       | 043-Electronics - Capacitor, electrolytic cylindrical, radial (both leads on the same side) - by mass | Mass (g)        | 16          |
| <b>Power supply</b>           | Medium caps                                             | 043-Electronics - Capacitor, electrolytic cylindrical, radial (both leads on the same side) - by mass | Mass (g)        | 12          |
| <b>Power supply</b>           | Medium coils                                            | 049-Electronics - Inductor, large cylindrical wound                                                   | Mass (g)        | 7.4         |
| <b>Power supply</b>           | Small ceramic caps                                      | 045-Electronics - Capacitor, ceramic (button)                                                         | Mass (g)        | 2.6         |
| <b>Power supply</b>           | Small box coils                                         | 048-Electronics - Inductor, chip (small box)                                                          | Mass (g)        | 7.2         |
| <b>Power supply</b>           | Power transistors                                       | 042-Electronics - Transistor, large/power                                                             | Mass (g)        | 8.7         |
| <b>Power supply</b>           | Power resistors                                         | 051-Electronics - Resistor, large (power)                                                             | Mass (g)        | 1.5         |
| <b>Power supply</b>           | Small metal bits, magnetic                              | 002-Metal - steel (screws)                                                                            | Mass (g)        | 2.6         |
| <b>Power supply</b>           | Small metal bits, non-magnetic                          | 003-Metal - aluminum (sheet)                                                                          | Mass (g)        | 6.6         |
| <b>Subtotal: Power supply</b> |                                                         |                                                                                                       | <b>Mass (g)</b> | <b>193</b>  |
| <b>Mainboard</b>              | Main logic board, 6 layer, 15.5x31cm                    | 021-Electronics - PCB (6 layer, bare)                                                                 | Mass (g)        | 186         |
| <b>Mainboard</b>              | 2X 12-port ethernet connector bank, 74g each            | 073-Electronics - ports - small metal (USB, firewire, ethernet)                                       | Mass (g)        | 148         |
| <b>Mainboard</b>              | Heatsink - black-coated non-magnetic metal 3 @ 21g each | 006-Metal - aluminum heatsink                                                                         | Mass (g)        | 63          |
| <b>Mainboard</b>              | LED banks                                               | 052-Electronics - LED                                                                                 | Mass (g)        | 19          |
| <b>Mainboard</b>              | Large caps                                              | 043-Electronics - Capacitor, electrolytic cylindrical, radial (both leads on the same side) - by mass | Mass (g)        | 16          |
| <b>Mainboard</b>              | Coils - small wound (several)                           | 049-Electronics - Inductor, large cylindrical wound                                                   | Mass (g)        | 3.0         |
| <b>Mainboard</b>              | Coils - toroidal (1x)                                   | 047-Electronics - Inductor, toroidal                                                                  | Mass (g)        | 3.0         |
| <b>Mainboard</b>              | Power resistors                                         | 051-Electronics - Resistor, large (power)                                                             | Mass (g)        | 0.8         |
| <b>Mainboard</b>              | Misc. connectors                                        | 081-Electronics - connectors - misc. on-board plugs                                                   | Mass (g)        | 14          |

| Subsystem             | Description                                            | Process (best fit)                           | Unit               | Measurement |
|-----------------------|--------------------------------------------------------|----------------------------------------------|--------------------|-------------|
|                       |                                                        | and connectors                               |                    |             |
| <b>Mainboard</b>      | Broadcom large SMT 28x28mm,<br>3 @ 5.9 g each, 204-pin | 038-Electronics - IC, medium SMT, >= 64 pin  | Mass (g)           | 18          |
| <b>Mainboard</b>      | 6X 40-pin DIP, 4.6g each,<br>28x12mm                   | 039-Electronics - IC, medium SMT, < 64 pin   | Mass (g)           | 28          |
| <b>Mainboard</b>      | Silicon die, by area ratio                             | 095-Silicon die - 2007 process (65 nm)       | Area (mm^2)        | 341         |
| <b>Mainboard</b>      | 2X 100-pin SMT 0.7g each                               | 038-Electronics - IC, medium SMT, >= 64 pin  | Mass (g)           | 1.4         |
| <b>Mainboard</b>      | Silicon die, by mass ratio                             | 095-Silicon die - 2007 process (65 nm)       | Area (mm^2)        | 26          |
| <b>Mainboard</b>      | 2X power transistors 1.5g each                         | 042-Electronics - Transistor, large/power    | Mass (g)           | 3.0         |
| <b>Mainboard</b>      | Tiny IC's and remaining bits                           | 040-Electronics - IC, tiny < 0.1g            | Mass (g)           | 4.4         |
|                       | <b>Subtotal: Circuit boards (total)</b>                |                                              | <b>Mass (g)</b>    | <b>507</b>  |
|                       | <b>Subtotal: Circuit boards<br/>(excluding IC's)</b>   |                                              | <b>Mass (g)</b>    | <b>460</b>  |
| <b>Interior parts</b> | Case fan 4x4 cm                                        | 065-Electronics - components - small CPU fan | Mass (g)           | 14          |
| <b>Interior parts</b> | Rubber cover for power plug                            | 012-Plastic - silicone rubber                | Mass (g)           | 2.1         |
|                       | <b>Subtotal: Other</b>                                 |                                              | <b>Mass (g)</b>    | <b>16</b>   |
|                       | <b>Subtotal: IC's (packages)</b>                       |                                              | <b>Mass (g)</b>    | <b>47</b>   |
|                       | <b>Subtotal: IC's (die)</b>                            |                                              | <b>Area (mm^2)</b> | <b>366</b>  |
|                       | <b>Total</b>                                           |                                              | <b>Mass (g)</b>    | <b>2119</b> |

Table S6-XXII: Full bill of materials, network switch

## L. Desktop: ecoinvent adjusted dataset

This product is a desktop PC, circa 2002 manufacture, of unknown dimensions, and total mass 11144g, excluding external packaging and cables. This dataset is an adaptation of the original dataset in ecoinvent, with modifications to adjust integrated circuit content, and to ensure consistency with other products analyzed in this study. Because the original dataset is under copyright by ecoinvent, only the summary dataset is provided.

| Category                    | Unit                    | Measurement | GHG (kg CO <sub>2</sub> -eq) | Primary energy (MJ) |
|-----------------------------|-------------------------|-------------|------------------------------|---------------------|
| Power supply                | Mass (g)                | 1463        | 38.2                         | 722.9               |
| Casing                      | Mass (g)                | 6207        | 13.1                         | 214.7               |
| Circuit boards (excl. IC's) | Mass (g)                | 1558        | 76.9                         | 1620.9              |
| IC's (packages)             | Mass (g)                | 119         | 80.4                         | 1778.1              |
| IC's (die)                  | Area (mm <sup>2</sup> ) | 2195        | 79.0                         | 1222.8              |
| Battery                     | Mass (g)                | 0           | 0.0                          | 0.0                 |
| Display                     | Mass (g)                | 0           | 0.0                          | 0.0                 |
| Other                       | Mass (g)                | 1796        | 29.9                         | 536.0               |
| Transport                   | Mass (g)                | 11144       | 2.8                          | 44.5                |
| Assembly                    | Products                | 1           | 1.2                          | 25.3                |
| Total                       | Mass(g)                 | 11144       | 321.6                        | 6165.2              |

Table S6-XXIII: Summary of bill of materials, desktop (adjusted ecoinvent dataset)

### M. Laptop: ecoinvent adjusted dataset

This product is a laptop PC with 12" display and dock, circa 2003 manufacture, of unknown dimensions, and total mass 3350g, excluding external packaging and cables. This dataset is an adaptation of the original dataset in ecoinvent, with modifications to adjust integrated circuit content, and to ensure consistency with other products analyzed in this study. Because the original dataset is under copyright by ecoinvent, only the summary dataset is provided.

| Category                    | Unit                    | Measurement | GHG (kg CO <sub>2</sub> -eq) | Primary energy (MJ) |
|-----------------------------|-------------------------|-------------|------------------------------|---------------------|
| Power supply                | Mass (g)                | 537         | 2.9                          | 53.5                |
| Casing                      | Mass (g)                | 1413        | 64.4                         | 330.2               |
| Circuit boards (excl. IC's) | Mass (g)                | 345         | 32.0                         | 605.6               |
| IC's (packages)             | Mass (g)                | 86          | 58.9                         | 1259.0              |
| IC's (die)                  | Area (mm <sup>2</sup> ) | 1577        | 67.8                         | 1002.8              |
| Battery                     | Mass (g)                | 273         | 1.4                          | 27.5                |
| Display                     | Mass (g)                | 328         | 19.3                         | 288.0               |
| Other                       | Mass (g)                | 367         | 7.4                          | 133.0               |
| Transport                   | Mass (g)                | 3349        | 0.8                          | 13.4                |
| Assembly                    | Products                | 1           | 1.2                          | 25.3                |
| Total                       | Mass(g)                 | 3350        | 256.2                        | 3738.2              |

Table S6-XXIV: Summary of bill of materials, laptop (adjusted ecoinvent dataset)

## N. LCD monitor: ecoinvent adjusted dataset

This product is a 17" LCD monitor, circa 2004 manufacture, of unknown dimensions, and total mass 5095g, excluding external packaging and cables. This dataset is an adaptation of the original dataset in ecoinvent, with modifications to adjust integrated circuit content, and to ensure consistency with other products analyzed in this study. The analysis does include a power supply, but the power supply for this product was consolidated with the mainboard, so that it is not possible to isolate power supply components. Because the original dataset is under copyright by ecoinvent, only the summary dataset is provided.

| Category                    | Unit                    | Measurement | GHG (kg CO <sub>2</sub> -eq) | Primary energy (MJ) |
|-----------------------------|-------------------------|-------------|------------------------------|---------------------|
| Power supply                | Mass (g)                | 114         | 11                           | 201                 |
| Casing                      | Mass (g)                | 862         | 6.8                          | 120.8               |
| Circuit boards (excl. IC's) | Mass (g)                | 94          | 9.6                          | 180.4               |
| IC's (packages)             | Mass (g)                | 19          | 14.2                         | 268.5               |
| IC's (die)                  | Area (mm <sup>2</sup> ) | 355         | 17.0                         | 255.5               |
| Battery                     | Mass (g)                | 0           | 0.0                          | 0.0                 |
| Display                     | Mass (g)                | 4006        | 236.3                        | 3518.1              |
| Other                       | Mass (g)                | 0           | 0.0                          | 0.0                 |
| Transport                   | Mass (g)                | 5096        | 1.3                          | 20.3                |
| Assembly                    | Products                | 1           | 1.2                          | 25.3                |
| <b>Total</b>                | Mass(g)                 | 5096        | 297.3                        | 4589.5              |

Table S6-XXV: Summary of bill of materials, LCD monitor (adjusted ecoinvent dataset)

## S7. Mapping to ecoinvent processes

All bills-of-materials in this analysis were tabulated in terms of a set of processes which was custom-created for the purposes of this project, rather than mapping directly to an established dataset such as ecoinvent. The purpose of this decision was to decouple the primary data contained in the bills-of-materials from the ecoinvent database, in order to allow the analysis to be repeated with a different or updated process database in the future. Any such updates or comparisons can be undertaken simply by altering the mapping from our process set to the new process database. These mappings are provided in this section.

In the subsequent tables, our custom process names are listed on the left, with entries in bold. The ecoinvent entries which map to that process are listed immediately above. In many cases there is a one-to-one mapping, but in some cases multiple ecoinvent processes are encapsulated in one of our processes; for example, a quantity of sheet steel in our process list maps to a raw material input (1154: steel, low-alloyed, at plant) and a processing step (1174: sheet rolling, steel). In other cases, our process list is more specific than ecoinvent's, and we use the same ecoinvent process to model several of our processes; for example, we have processes for four sizes of case fans, but all map to the same one ecoinvent process, such that our four processes are functionality identical in the current mapping. These redundant processes were not consolidated in order to allow for flexibility in future analyses if more specific process data becomes available. In such cases, the redundant process is marked "as above" to indicate that its component ecoinvent processes are identical to those of the process immediately preceding it in the listing.

The vast majority of processes are scaled by mass. Some ecoinvent processes use area as a functional unit, notably those describing circuit boards and LCD screens. In each case we converted these to mass units based on ecoinvent documentation. We express silicon die in area, but use data from Boyd (5) rather than ecoinvent; further details are provided in the appropriate section.

### A. Metals

Metals typically include a raw material extraction stage and processing stage in the ecoinvent database, which we have emulated here. We did not model any metals beside the limited set here because we lacked the ability to identify exotic metals or alloys. Such materials are likely to have a higher impact than the metals listed here, so this may lead to underestimations in total impact.



| Process name                         | Functional unit  | Ecoinvent process id | Ecoinvent process name              | Amount   | Unit      |
|--------------------------------------|------------------|----------------------|-------------------------------------|----------|-----------|
|                                      |                  | 1154                 | steel, low-alloyed, at plant        | 1        | Kg        |
|                                      |                  | 1174                 | sheet rolling, steel                | 1        | Kg        |
| <b>001-Metal - steel (sheet)</b>     | <b>Mass (kg)</b> | <b>(Total)</b>       |                                     | <b>1</b> | <b>Kg</b> |
|                                      |                  | 1072                 | chromium steel 18/8, at plant       | 1        | kg        |
|                                      |                  | 1165                 | hot rolling, steel                  | 1        | kg        |
| <b>002-Metal - steel (screws)</b>    | <b>Mass (kg)</b> | <b>(Total)</b>       |                                     | <b>1</b> | <b>kg</b> |
|                                      |                  | 1056                 | aluminium, production mix, at plant | 1        | kg        |
|                                      |                  | 1171                 | sheet rolling, aluminium            | 1        | kg        |
| <b>003-Metal - aluminum (sheet)</b>  | <b>Mass (kg)</b> | <b>(Total)</b>       |                                     | <b>1</b> | <b>kg</b> |
|                                      |                  | 1074                 | copper, at regional storage         | 1        | kg        |
|                                      |                  | 1173                 | sheet rolling, copper               | 1        | kg        |
| <b>004-Metal - copper (sheet)</b>    | <b>Mass (kg)</b> | <b>(Total)</b>       |                                     | <b>1</b> | <b>kg</b> |
|                                      |                  | 1056                 | aluminium, production mix, at plant | 1        | kg        |
|                                      |                  | 1169                 | section bar extrusion, aluminium    | 1        | kg        |
| <b>005-Metal - aluminum (solid)</b>  | <b>Mass (kg)</b> | <b>(Total)</b>       |                                     | <b>1</b> | <b>kg</b> |
| <b>006-Metal - aluminum heatsink</b> | <b>Mass (kg)</b> | <b>(as above)</b>    |                                     | <b>1</b> | <b>kg</b> |

|                                             |                  |      |                                                     |          |           |
|---------------------------------------------|------------------|------|-----------------------------------------------------|----------|-----------|
|                                             |                  | 1074 | copper, at regional storage                         | 1        | kg        |
|                                             |                  | 8339 | copper product manufacturing, average metal working | 1        | kg        |
| <b>007-Metal - copper heatsink</b>          | <b>Mass (kg)</b> |      | <b>(total)</b>                                      |          | <b>kg</b> |
|                                             |                  | 1107 | magnesium-alloy, AZ91, at plant                     | 1        | kg        |
|                                             |                  | 1108 | magnesium-alloy, AZ91, die-casting, at plant        | 1        | kg        |
| <b>088-Metal - Magnesium alloy (casing)</b> | <b>Mass (kg)</b> |      | <b>(total)</b>                                      | <b>1</b> | <b>kg</b> |

Table S7-I: Process ecoinvent mapping, metals

## B. Plastics and paper

Most plastics have a straightforward mapping. Several ABS-polycarbonate blends were encountered in disassembly; these were assumed to require 30% polycarbonate and 70% ABS, plus an additional processing step.

| Process name             | Functional unit  | Ecoinvent process id | Ecoinvent process name                                   | Amount   | Unit      |
|--------------------------|------------------|----------------------|----------------------------------------------------------|----------|-----------|
|                          |                  | 1817                 | acrylonitrile-butadiene-styrene copolymer, ABS, at plant | 1        | kg        |
| <b>008-Plastic - ABS</b> | <b>Mass (kg)</b> |                      | <b>(Total)</b>                                           | <b>1</b> | <b>kg</b> |
|                          |                  | 1826                 | polycarbonate, at plant                                  | 0.3      | kg        |
|                          |                  | 1817                 | acrylonitrile-butadiene-styrene copolymer, ABS, at plant | 0.7      | kg        |

|                                                            |                  |       |                                                     |          |           |
|------------------------------------------------------------|------------------|-------|-----------------------------------------------------|----------|-----------|
|                                                            |                  | 1853  | injection moulding                                  | 1        | kg        |
| <b>009-Plastic - ABS + PC blend</b>                        | <b>Mass (kg)</b> |       | <b>(Total)</b>                                      | <b>1</b> | <b>kg</b> |
|                                                            |                  |       |                                                     |          |           |
|                                                            |                  | 1826  | polycarbonate, at plant                             | 1        | kg        |
| <b>010-Plastic - PC</b>                                    | <b>Mass (kg)</b> |       | <b>(Total)</b>                                      | <b>1</b> | <b>kg</b> |
|                                                            |                  |       |                                                     |          |           |
|                                                            |                  | 1854  | packaging film, LDPE, at plant                      | 1        | kg        |
| <b>011-Plastic - LDPE (plastic wrap)</b>                   | <b>Mass (kg)</b> |       | <b>(Total)</b>                                      | <b>1</b> | <b>kg</b> |
|                                                            |                  |       |                                                     |          |           |
|                                                            |                  | 324   | silicone product, at plant                          | 1        | kg        |
| <b>012-Plastic - silicone rubber</b>                       | <b>Mass (kg)</b> |       | <b>(Total)</b>                                      | <b>1</b> | <b>kg</b> |
|                                                            |                  |       |                                                     |          |           |
|                                                            |                  | 1836  | polystyrene, general purpose, GPPS, at plant        | 1        | kg        |
| <b>013-Plastic - polystyrene film (flex circuit board)</b> | <b>Mass (kg)</b> |       | <b>(Total)</b>                                      | <b>1</b> | <b>kg</b> |
|                                                            |                  |       |                                                     |          |           |
|                                                            |                  | 11792 | 11792 polystyrene foam slab, 45% recycled, at plant | 1        | kg        |
| <b>014-Plastic - Styrofoam (packaging)</b>                 | <b>Mass (kg)</b> |       | <b>(Total)</b>                                      | <b>1</b> | <b>kg</b> |
|                                                            |                  |       |                                                     |          |           |
|                                                            |                  | 1839  | polyurethane, rigid foam, at plant                  | 1        | kg        |
| <b>015-Plastic - polyurethane foam (packaging)</b>         |                  |       |                                                     | <b>1</b> | <b>kg</b> |
|                                                            |                  |       |                                                     |          |           |
|                                                            |                  | 1802  | epoxy resin, liquid, at plant                       | 1        | kg        |
| <b>016-Plastic - epoxy</b>                                 | <b>Mass (kg)</b> |       | <b>(Total)</b>                                      | <b>1</b> | <b>kg</b> |
|                                                            |                  |       |                                                     |          |           |
|                                                            |                  | 1840  | polyvinylchloride, at regional storage              | 1        | kg        |
| <b>089-Plastic - PVC (polyvinylchloride)</b>               | <b>Mass (kg)</b> |       | <b>(total)</b>                                      | <b>1</b> | <b>kg</b> |
|                                                            |                  |       |                                                     |          |           |

|                      |                  |      |                                                          |          |           |
|----------------------|------------------|------|----------------------------------------------------------|----------|-----------|
|                      |                  | 1691 | corrugated board, recycling fibre, double wall, at plant | 1        | kg        |
| <b>017-Cardboard</b> | <b>Mass (kg)</b> |      | <b>(Total)</b>                                           | <b>1</b> | <b>kg</b> |
|                      |                  |      |                                                          |          |           |
|                      |                  | 1714 | paper, recycling, with deinking, at plant                | 1        | kg        |
| <b>018-Paper</b>     | <b>Mass (kg)</b> |      | <b>(Total)</b>                                           | <b>1</b> | <b>kg</b> |

Table S7-II: Process ecoinvent mapping, plastics and paper

### C. Circuit boards and integrated circuits

All circuit boards are modeled using a mass functional unit which is based on the 6-layer lead-free process from ecoinvent; one kg of circuit board is assumed to be equivalent to 0.31 m<sup>2</sup> of the ecoinvent process, using the relationship provided in the ecoinvent documentation. Adjustments should ideally be made for boards with different numbers of layers as these would have differing mixtures of materials (e.g. epoxy and metal in interior layers) but we did not have enough information to construct such models. All circuit boards were stripped of parts and weighed in a depopulated state which allowed us to use a mass functional unit. In circumstances where circuit board depopulation is not possible, it would be feasible to construct approximate models of populated circuit boards including components (these do exist in ecoinvent), but we did not require this additional level of detail.

ICs are modeled differently depending on the type of package. Smaller ICs typically consist of a silicon die encased in an epoxy encapsulation which is mounted directly on the board. Larger ICs are mounted on a small board with a ball grid array of pins, and may include a bare exposed die, a die within an epoxy encapsulation, or a die within a metal heat spreader. These four types of package (encapsulation only, board + encapsulation, board + bare die, board + heat spreader) are each modeled using the ecoinvent dataset for packaged ICs (7016: integrated circuit, IC, logic type, at plant) with modifications to account for the presence or absence of an encapsulation (SiO<sub>2</sub> epoxy), a board (mostly copper and glass fiber), and a heat spreader (assumed to be aluminum, and accounting for about 80% of the mass of the total package), with the materials proportionally mass-scaled. We assume electricity in producing ICs is consistent, such that a collection of any type of packaged ICs requires the same electricity input, i.e. 669kWh per kg of product; as this turns out to be a major component of the impact of a package, this assumption should be explored in more detailed future studies. The silicon die are modeled separately from the packages in order to allow for the use of Boyd's (2009) data which varies depending on the year of manufacture.

| Process name                                                               | Functional unit  | Ecoinvent process id | Ecoinvent process name                                                                                                                          | Amount   | Unit      |
|----------------------------------------------------------------------------|------------------|----------------------|-------------------------------------------------------------------------------------------------------------------------------------------------|----------|-----------|
|                                                                            |                  | 10995                | printed wiring board, surface mount, lead-free surface, at plant                                                                                | 0.31     | m^2       |
| <b>019-Electronics - PCB (2 layer, bare)</b>                               | <b>Mass (kg)</b> |                      | <b>(Total)</b>                                                                                                                                  | <b>1</b> | <b>Kg</b> |
| <b>020-Electronics - PCB (4 layer, bare)</b>                               | <b>Mass (kg)</b> |                      | <b>(as above)</b>                                                                                                                               | <b>1</b> | <b>Kg</b> |
| <b>021-Electronics - PCB (6 layer, bare)</b>                               | <b>Mass (kg)</b> |                      | <b>(as above)</b>                                                                                                                               | <b>1</b> | <b>kg</b> |
| <b>022-Electronics - PCB (8 layer, bare)</b>                               | <b>Mass (kg)</b> |                      | <b>(as above)</b>                                                                                                                               | <b>1</b> | <b>kg</b> |
| <b>023-Electronics - PCB (10 layer, bare)</b>                              | <b>Mass (kg)</b> |                      | <b>(as above)</b>                                                                                                                               | <b>1</b> | <b>kg</b> |
| <b>024-Electronics - PCB (12 layer, bare)</b>                              | <b>Mass (kg)</b> |                      | <b>(as above)</b>                                                                                                                               | <b>1</b> | <b>kg</b> |
|                                                                            |                  |                      |                                                                                                                                                 |          |           |
|                                                                            |                  |                      | Modified version of ecoinvent integrated circuit process with silicon die removed, not reproduced here due to copyright                         |          |           |
| <b>025-Electronics - IC, large BGA (mounted, plastic package, 144 pin)</b> | <b>Mass (kg)</b> |                      | <b>(Total)</b>                                                                                                                                  | <b>1</b> | <b>kg</b> |
| <b>026-Electronics - IC, large BGA (mounted, plastic package, 256 pin)</b> |                  |                      | <b>(as above)</b>                                                                                                                               | <b>1</b> | <b>kg</b> |
| <b>027-Electronics - IC, large BGA (mounted, plastic package, 672 pin)</b> | <b>Mass (kg)</b> |                      | <b>(as above)</b>                                                                                                                               | <b>1</b> | <b>kg</b> |
|                                                                            |                  |                      |                                                                                                                                                 |          |           |
|                                                                            |                  |                      | Modified version of ecoinvent integrated circuit process with silicon die removed and heat spreader added, not reproduced here due to copyright |          |           |
| <b>028-Electronics - IC, large BGA (with heat spreader, 144 pin)</b>       | <b>Mass (kg)</b> |                      | <b>(Total)</b>                                                                                                                                  | <b>1</b> | <b>kg</b> |
| <b>029-Electronics - IC, large BGA (with heat</b>                          | <b>Mass (kg)</b> |                      | <b>(as above)</b>                                                                                                                               | <b>1</b> | <b>kg</b> |

|                                                                                                                                            |                         |                  |                   |
|--------------------------------------------------------------------------------------------------------------------------------------------|-------------------------|------------------|-------------------|
| spreader, 256 pin)                                                                                                                         |                         |                  |                   |
| 030-Electronics - IC, large BGA (with heat spreader, 672 pin)                                                                              | Mass (kg)               | (as above)       | 1 kg              |
| Modified version of ecoinvent integrated circuit process with silicon die and encapsulation removed, not reproduced here due to copyright  |                         |                  |                   |
| 031-Electronics - IC, large BGA (mounted bare die, 144 pin)                                                                                | Mass (kg)               | (Total)          | 1 kg              |
| 032-Electronics - IC, large BGA (mounted bare die, 256 pin)                                                                                | Mass (kg)               | (as above)       | 1 kg              |
| 033-Electronics - IC, large BGA (mounted bare die, 672 pin)                                                                                | Mass (kg)               | (as above)       | 1 kg              |
| Modified version of ecoinvent integrated circuit process with silicon die and mounting board removed, not reproduced here due to copyright |                         |                  |                   |
| 034-Electronics - IC, large BGA SMT, no PCB (144 pin)                                                                                      | Mass (kg)               | (Total)          | 1 kg              |
| 035-Electronics - IC, large BGA SMT, no PCB (256 pin)                                                                                      | Mass (kg)               | (as above)       | 1 kg              |
| 036-Electronics - IC, large BGA SMT, no PCB (672 pin)                                                                                      | Mass (kg)               | (as above)       | 1 kg              |
| 037-Electronics - IC, packaged RAM chip                                                                                                    | Mass (kg)               | (as above)       | 1 kg              |
| 039-Electronics - IC, medium SMT, < 64 pin                                                                                                 | Mass (kg)               | (as above)       | 1 kg              |
| 038-Electronics - IC, medium SMT, >= 64 pin                                                                                                | Mass (kg)               | (as above)       | 1 kg              |
| 090-Silicon die - 1995 process (350nm)                                                                                                     |                         |                  |                   |
|                                                                                                                                            | Area (mm <sup>2</sup> ) | From Boyd (2009) | 1 mm <sup>2</sup> |

|                                         |                            |                  |                   |
|-----------------------------------------|----------------------------|------------------|-------------------|
| 091-Silicon die - 1998 process (250 nm) | Area<br>(mm <sup>2</sup> ) | From Boyd (2009) | 1 mm <sup>2</sup> |
| 092-Silicon die - 1999 process (180 nm) | Area<br>(mm <sup>2</sup> ) | From Boyd (2009) | 1 mm <sup>2</sup> |
| 093-Silicon die - 2001 process (130 nm) | Area<br>(mm <sup>2</sup> ) | From Boyd (2009) | 1 mm <sup>2</sup> |
| 094-Silicon die - 2004 process (90 nm)  | Area<br>(mm <sup>2</sup> ) | From Boyd (2009) | 1 mm <sup>2</sup> |
| 095-Silicon die - 2007 process (65 nm)  | Area<br>(mm <sup>2</sup> ) | From Boyd (2009) | 1 mm <sup>2</sup> |
| 096-Silicon die - 2010 process (45 nm)  | Area<br>(mm <sup>2</sup> ) | From Boyd (2009) | 1 mm <sup>2</sup> |

Table S7-III: Processecoinvent mapping, circuit boards and integrated circuits

## D. Small electronic components

This includes small board-mounted components including transistors, capacitors, resistors, diodes, and inductors. The ecoinvent dataset has a fairly broad collection of entries here and we are able to make fairly good mappings. The impacts of these parts are usually quite small, as their masses are often 10g or less, so the overall error due to a poor match with the ecoinvent process is likely very small.

| Process name                                                                                                 | Functional unit  | Ecoinvent process id | Ecoinvent process name                                         | Amount   | Unit      |
|--------------------------------------------------------------------------------------------------------------|------------------|----------------------|----------------------------------------------------------------|----------|-----------|
|                                                                                                              |                  | 7065                 | electronic component, unspecified, at plant                    | 1        | kg        |
| <b>040-Electronics - IC, tiny &lt; 0.1g</b>                                                                  | <b>Mass (kg)</b> |                      | <b>(Total)</b>                                                 | <b>1</b> | <b>kg</b> |
|                                                                                                              |                  |                      |                                                                |          |           |
|                                                                                                              |                  | 7079                 | transistor, wired, small size, through-hole mounting, at plant | 1        | kg        |
| <b>041-Electronics - Transistor, small</b>                                                                   | <b>Mass (kg)</b> |                      | <b>(Total)</b>                                                 | <b>1</b> | <b>kg</b> |
|                                                                                                              |                  |                      |                                                                |          |           |
|                                                                                                              |                  | 7113                 | transistor, wired, big size, through-hole mounting, at plant   | 1        | kg        |
| <b>042-Electronics - Transistor, large/power</b>                                                             | <b>Mass (kg)</b> |                      | <b>(Total)</b>                                                 | <b>1</b> | <b>kg</b> |
|                                                                                                              |                  |                      |                                                                |          |           |
|                                                                                                              |                  | 7011                 | capacitor, electrolyte type, < 2cm height, at plant            | 1        | kg        |
| <b>043-Electronics - Capacitor, electrolytic cylindrical, radial (both leads on the same side) - by mass</b> | <b>Mass (kg)</b> |                      | <b>(total)</b>                                                 | <b>1</b> | <b>kg</b> |
|                                                                                                              |                  |                      |                                                                |          |           |
|                                                                                                              |                  | 7013                 | capacitor, Tantalum-, through-hole mounting, at plant          | 1        | kg        |



|                                                             |                  |                                                                 |             |
|-------------------------------------------------------------|------------------|-----------------------------------------------------------------|-------------|
| <b>044-Electronics - Capacitor, tantalum (small/yellow)</b> | <b>Mass (kg)</b> | <b>(total)</b>                                                  | <b>1 kg</b> |
|                                                             |                  |                                                                 |             |
|                                                             |                  | 7014 capacitor, unspecified, at plant                           | 1 kg        |
| <b>045-Electronics - Capacitor, ceramic (button)</b>        | <b>Mass (kg)</b> | <b>(total)</b>                                                  | <b>1 kg</b> |
|                                                             |                  |                                                                 |             |
|                                                             |                  | 7009 capacitor, film, through-hole mounting, at plant           | 1 kg        |
| <b>046-Electronics - Capacitor, polyester film (box)</b>    | <b>Mass (kg)</b> | <b>(total)</b>                                                  | <b>1 kg</b> |
|                                                             |                  |                                                                 |             |
|                                                             |                  | 7067 inductor, ring core choke type, at plant                   | 1 kg        |
| <b>047-Electronics - Inductor, toroidal</b>                 | <b>Mass (kg)</b> | <b>(total)</b>                                                  | <b>1 kg</b> |
|                                                             |                  |                                                                 |             |
|                                                             |                  | 10155 inductor, miniature RF chip type, MRFI, at plant          | 1 kg        |
| <b>048-Electronics - Inductor, chip (small box)</b>         | <b>Mass (kg)</b> | <b>(total)</b>                                                  | <b>1 kg</b> |
|                                                             |                  |                                                                 |             |
|                                                             |                  | 10154 inductor, unspecified, at plant                           | 1 kg        |
| <b>049-Electronics - Inductor, large cylindrical wound</b>  | <b>Mass (kg)</b> | <b>(total)</b>                                                  | <b>1 kg</b> |
|                                                             |                  |                                                                 |             |
|                                                             |                  | 7076 diode, glass-, through-hole mounting, at plant             | 1 kg        |
| <b>050-Electronics - Diode, large (power)</b>               | <b>Mass (kg)</b> | <b>(total)</b>                                                  | <b>1 kg</b> |
|                                                             |                  |                                                                 |             |
|                                                             |                  | 7069 resistor, metal film type, through-hole mounting, at plant | 1 kg        |
| <b>051-Electronics - Resistor, large (power)</b>            | <b>Mass (kg)</b> | <b>(total)</b>                                                  | <b>1 kg</b> |
|                                                             |                  |                                                                 |             |
|                                                             |                  | 7077 light emitting diode, LED, at plant                        | 1 kg        |
| <b>052-Electronics - LED</b>                                | <b>Mass (kg)</b> | <b>(total)</b>                                                  | <b>1 kg</b> |

Table S7-IV: Process ecoinvent mapping, small electronic components

## E. Other electronic and electrical components

This includes larger items like batteries, drives, and displays, and miscellaneous items like connectors and ports. The e-ink display module is modeled using the same process as other LCD display modules, owing to its roughly similar composition, though there are likely to be significant differences in the manufacturing process that are not accounted for.

| Process name                                      | Functional unit  | Ecoinvent process id | Ecoinvent process name                                                       | Amount   | Unit      |
|---------------------------------------------------|------------------|----------------------|------------------------------------------------------------------------------|----------|-----------|
|                                                   |                  | 11786                | single cell, lithium-ion battery, lithium manganese oxide/graphite, at plant | 1        | kg        |
| <b>053-Battery - Li-Ion 24.8 Whr (iPad)</b>       | <b>Mass (kg)</b> |                      | <b>(total)</b>                                                               | <b>1</b> | <b>kg</b> |
| <b>054-Battery - Li-Ion 32 Whr (Laptop)</b>       | <b>Mass (kg)</b> |                      | <b>(as above)</b>                                                            | <b>1</b> | <b>kg</b> |
| <b>055-Battery - Li-Ion 2.83 Whr (iPod touch)</b> | <b>Mass (kg)</b> |                      | <b>(as above)</b>                                                            | <b>1</b> | <b>kg</b> |
| <b>056-Battery - CR2032 3V Li-Ion (CMOS)</b>      | <b>Mass (kg)</b> |                      | <b>(as above)</b>                                                            | <b>1</b> | <b>kg</b> |
| <b>057-Battery - small on-board</b>               | <b>Mass (kg)</b> |                      | <b>(as above)</b>                                                            | <b>1</b> | <b>kg</b> |
|                                                   |                  |                      |                                                                              |          |           |
|                                                   |                  | 7000                 | LCD module, at plant                                                         | 1        | kg        |
| <b>058-Display - LCD module</b>                   | <b>Mass (kg)</b> |                      | <b>(total)</b>                                                               | <b>1</b> | <b>kg</b> |
| <b>060-Display - E-ink module</b>                 | <b>Mass (kg)</b> |                      | <b>(as above)</b>                                                            | <b>1</b> | <b>kg</b> |
|                                                   |                  |                      |                                                                              |          |           |
|                                                   |                  | 10167                | LCD glass, at plant                                                          | 1        | kg        |

|                                                                        |                  |                                                  |             |
|------------------------------------------------------------------------|------------------|--------------------------------------------------|-------------|
| <b>059-Display - Glass</b>                                             | <b>Mass (kg)</b> | <b>(total)</b>                                   | <b>1 kg</b> |
|                                                                        |                  |                                                  |             |
|                                                                        | 10160            | CD-ROM/DVD-ROM drive, desktop computer, at plant | 1 kg        |
| <b>061-Electronics - components - DVD drive</b>                        | <b>Mass (kg)</b> | <b>(total)</b>                                   | <b>1 kg</b> |
|                                                                        |                  |                                                  |             |
|                                                                        | 10158            | HDD, desktop computer, at plant                  | 1 kg        |
| <b>062-Electronics - components - full-size hard disk</b>              | <b>Mass (kg)</b> | <b>(total)</b>                                   | <b>1 kg</b> |
|                                                                        |                  |                                                  |             |
|                                                                        | 10159            | HDD, laptop computer, at plant                   | 1 kg        |
| <b>063-Electronics - components - laptop-size hard disk</b>            | <b>Mass (kg)</b> | <b>(total)</b>                                   | <b>1 kg</b> |
| <b>064-Electronics - components - 3.5" floppy drive</b>                | <b>Mass (kg)</b> | <b>(as above)</b>                                | <b>1 kg</b> |
|                                                                        |                  |                                                  |             |
|                                                                        | 10806            | fan, at plant                                    | 1 kg        |
| <b>065-Electronics - components - small CPU fan</b>                    | <b>Mass (kg)</b> | <b>(total)</b>                                   | <b>1 kg</b> |
| <b>066-Electronics - components - small case fan</b>                   | <b>Mass (kg)</b> | <b>(as above)</b>                                | <b>1 kg</b> |
| <b>067-Electronics - components - medium case fan</b>                  | <b>Mass (kg)</b> | <b>(as above)</b>                                | <b>1 kg</b> |
| <b>068-Electronics - components - large case fan</b>                   | <b>Mass (kg)</b> | <b>(as above)</b>                                | <b>1 kg</b> |
|                                                                        |                  |                                                  |             |
|                                                                        | 7117             | power adapter, for laptop, at plant              | 1 kg        |
| <b>069-Electronics - components - wall wart</b>                        | <b>Mass (kg)</b> | <b>(total)</b>                                   | <b>1 kg</b> |
|                                                                        |                  |                                                  |             |
|                                                                        | 10162            | connector, computer, peripheral type, at plant   | 1 kg        |
| <b>072-Electronics - ports - video multi-pin</b>                       | <b>Mass (kg)</b> | <b>(Total)</b>                                   | <b>1 kg</b> |
| <b>073-Electronics - ports - small metal (USB, firewire, ethernet)</b> | <b>Mass (kg)</b> | <b>(as above)</b>                                | <b>1 kg</b> |
| <b>074-Electronics - ports - audio</b>                                 | <b>Mass (kg)</b> | <b>(as above)</b>                                | <b>1 kg</b> |
| <b>075-Electronics - ports - AC power plug</b>                         | <b>Mass (kg)</b> | <b>(as above)</b>                                | <b>1 kg</b> |

|                                                                           |                  |                                                             |             |
|---------------------------------------------------------------------------|------------------|-------------------------------------------------------------|-------------|
| <b>076-Electronics - connectors - full-size RAM slot</b>                  | <b>Mass (kg)</b> | <b>(as above)</b>                                           | <b>1 kg</b> |
| <b>077-Electronics - connectors - laptop-size RAM slot</b>                | <b>Mass (kg)</b> | <b>(as above)</b>                                           | <b>1 kg</b> |
| <b>078-Electronics - connectors - video card slot</b>                     | <b>Mass (kg)</b> | <b>(as above)</b>                                           | <b>1 kg</b> |
| <b>080-Electronics - connectors - CPU socket</b>                          | <b>Mass (kg)</b> | <b>(as above)</b>                                           | <b>1 kg</b> |
| <b>081-Electronics - connectors - misc. on-board plugs and connectors</b> | <b>Mass (kg)</b> | <b>(as above)</b>                                           | <b>1 kg</b> |
|                                                                           |                  |                                                             |             |
|                                                                           |                  | 7081 connector, PCI bus, at plant                           | 1 kg        |
| <b>079-Electronics - connectors - PCI-type slot</b>                       | <b>Mass (kg)</b> | <b>(Total)</b>                                              | <b>1 kg</b> |
|                                                                           |                  |                                                             |             |
|                                                                           |                  | 7017 cable, connector for computer, without plugs, at plant | 1 kg        |
| <b>082-Electronics - cables - power cords, thick cables and cords</b>     |                  | <b>(total)</b>                                              | <b>1 kg</b> |
| <b>084-Electronics - cables - small cables and wires</b>                  |                  | <b>(as above)</b>                                           | <b>1 kg</b> |
|                                                                           |                  |                                                             |             |
|                                                                           |                  | 7116 cable, ribbon cable, 20-pin, with plugs, at plant      | 1 kg        |
| <b>083-Electronics - cables - large ribbon cables</b>                     | <b>Mass (kg)</b> | <b>(total)</b>                                              | <b>1 kg</b> |

Table S7-V: Process ecoinvent mapping, other electronic and electrical components

## F. Non-material processes

Non-material processes include transport and assembly. All were modeled using standard ecoinvent assumptions. Transport is modeled using a mass functional unit with a fixed amount of travel per unit mass, for convenience.

| Process name                                                   | Functional unit  | Ecoinvent process id | Ecoinvent process name                                | Amount      | Unit           |
|----------------------------------------------------------------|------------------|----------------------|-------------------------------------------------------|-------------|----------------|
|                                                                |                  | 1983                 | transport, freight, rail                              | 142         | km-kg          |
|                                                                |                  | 1943                 | transport, lorry >16t, fleet average                  | 132         | km-kg          |
|                                                                |                  | 1968                 | transport, transoceanic freight ship                  | 806         | km-kg          |
| <b>086-Transport - subcomponent logistics (per mass)</b>       | <b>Mass (kg)</b> | <b>(total)</b>       |                                                       | <b>1</b>    | <b>kg</b>      |
|                                                                |                  | 1983                 | transport, freight, rail                              | 200         | km-kg          |
|                                                                |                  | 1943                 | transport, lorry >16t, fleet average                  | 100         | km-kg          |
|                                                                |                  | 1968                 | transport, transoceanic freight ship                  | 21300       | km-kg          |
| <b>087-Transport - SE Asia to regional assembly (per mass)</b> | <b>Mass (kg)</b> | <b>(total)</b>       |                                                       | <b>1</b>    | <b>kg</b>      |
|                                                                |                  | 664                  | electricity, medium voltage, production UCTE, at grid | 1.11        | kWh            |
| <b>097-Assembly - subcomponent or small product</b>            | <b>product</b>   | <b>(Total)</b>       |                                                       | <b>1.00</b> | <b>product</b> |
|                                                                |                  | 664                  | electricity, medium voltage, production UCTE, at grid | 1.67        | kWh            |
| <b>098-Assembly - large component or medium product</b>        | <b>product</b>   | <b>(Total)</b>       |                                                       | <b>1.00</b> | <b>product</b> |

|                                     |                |     |                                                       |             |                |
|-------------------------------------|----------------|-----|-------------------------------------------------------|-------------|----------------|
|                                     |                | 664 | electricity, medium voltage, production UCTE, at grid | 2.22        | kWh            |
| <b>099-Assembly - large product</b> | <b>product</b> |     | <b>(Total)</b>                                        | <b>1.00</b> | <b>product</b> |

Table S7-VI: Process ecoinvent mapping, non-material processes

## S8. References

- (1) Apple *Product Environmental Reports*; 2011.
- (2) Hischier, R.; Classen, M.; Lehmann, M.; Scharnhorst, W. *Life cycle inventories of Electric and Electronic Equipment: Production, Use and Disposal*.; ecoinvent report No. 18; EMPA / Technology and Society Lab, Swiss Centre for Life Cycle Inventories: Dubendorf, Switzerland, 2007.
- (3) Teehan, P.; Kandlikar, M. Sources of Variation in Life Cycle Assessments of Desktop Computers. *Journal of Industrial Ecology* **2012**, *16*, S182–S194.
- (4) Weber, C. L. Uncertainty and Variability in Product Carbon Footprinting. *Journal of Industrial Ecology* **2012**, *16*, 203–211.
- (5) Boyd, S. B.; Horvath, A.; Dornfeld, D. Life-Cycle Energy Demand and Global Warming Potential of Computational Logic. *Environmental Science & Technology* **2009**, *43*, 7303–7309.
- (6) Socolof, M. L.; Overly, J. G.; Geibig, J. R. Environmental life-cycle impacts of CRT and LCD desktop computer displays. *Journal of Cleaner Production* **2005**, *13*, 1281–1294.
- (7) Frischknecht, R.; Jungbluth, N.; Althaus, H.-J.; Doka, G.; Dones, R.; Heck, T.; Hellweg, S.; Hischier, R.; Nemecek, T.; Rebitzer, G.; Spielmann, M. The ecoinvent Database: Overview and Methodological Framework. *The International Journal of Life Cycle Assessment* **2005**, *10*, 3–9.
- (8) LaPedus, M. Industry agrees on first 450-mm wafer standard. *EETimes* **2008**.
- (9) Apte, P.; Bottoms, W. R.; Chen, W.; Scalise, G. Good things in small packages. *Spectrum, IEEE* **2011**, *48*, 44–49.
- (10) iFixit Apple A4 Teardown. <http://www.ifixit.com/Teardown/Apple-A4-Teardown/2204/1> (accessed June 18, 2012).
- (11) Feldman, I. iPad Memories. <http://hightechbizdev.com/2011/03/24/ira-feldman-high-technology-business-development-ipad-memories/> (accessed June 18, 2012).
- (12) Marsal, K. Teardown of Apple's 4th-gen iPod touch finds 256MB of RAM. [http://www.appleinsider.com/articles/10/09/08/teardown\\_of\\_apples\\_4th\\_gen\\_ipod\\_touch\\_finds\\_256mb\\_of\\_ram.html](http://www.appleinsider.com/articles/10/09/08/teardown_of_apples_4th_gen_ipod_touch_finds_256mb_of_ram.html) (accessed June 18, 2012).
- (13) EveryiPod.com iPod Q&A - Updated October 11, 2011. <http://www.everymac.com/systems/apple/ipod/ipod-faq/differences-between-4th-gen-ipod-touch-3rd-gen-ipod-touch.html> (accessed June 18, 2012).
- (14) Chipworks Inc. Teardown of the 3rd generation Amazon Kindle DX. <http://www.chipworks.com/en/technical-competitive-analysis/resources/recent-teardowns/2010/11/teardown-of-the-3rd-generation-amazon-kindle-dx/> (accessed June 18, 2012).
